# Supplementary material for: Structure Revision of Formyl Phloroglucinol Meroterpenoids: A Unified Approach Using NMR Fingerprinting and DFT NMR and ECD Analyses
Source: MDPI journal article supplement (doi:10.3390/molecules29030594), 2024-01-25
Supplement: s1 [file s1]

# Structure Revision of Formyl Phloroglucinol Meroterpenoids: A Unified Approach Using NMR Fingerprinting and DFT NMR and ECD Analyses

Darren C. Holland <sup>1,2,\*</sup> and Anthony R. Carroll <sup>1,2,\*</sup>

<sup>1</sup>School of Environment and Science, Griffith University, Queensland 4111, Australia

<sup>2</sup>Griffith Institute for Drug Discovery, Griffith University, Nathan, Queensland 4111, Australia

\*Correspondence: darren.holland@griffith.edu.au (D.C.H.); a.carroll@griffith.edu.au (A.R.C.)

## 1. Table of Contents

|                  |                                                                                                                                                                                                                              |
|------------------|------------------------------------------------------------------------------------------------------------------------------------------------------------------------------------------------------------------------------|
| <b>Table S1</b>  | Eucalyprobusal C ( <b>1a</b> ) comparative <sup>13</sup> C NMR data with DFT-calculated <sup>13</sup> C NMR data for incorrect structure <b>1a</b> .                                                                         |
| <b>Table S2</b>  | Eucalyprobusal C ( <b>1a</b> ) comparative <sup>13</sup> C NMR data with DFT-calculated <sup>13</sup> C NMR data for revised structure <b>1b</b> .                                                                           |
| <b>Table S3</b>  | Eucalyprobusal C ( <b>1a</b> ) comparative <sup>1</sup> H NMR data with DFT-calculated <sup>1</sup> H NMR data for incorrect structure <b>1a</b> .                                                                           |
| <b>Table S4</b>  | Eucalyprobusal C ( <b>1a</b> ) comparative <sup>1</sup> H NMR data with DFT-calculated <sup>1</sup> H NMR data for revised structure <b>1b</b> .                                                                             |
| <b>Table S5</b>  | Eucalypcamal K ( <b>2a</b> ) comparative <sup>13</sup> C NMR data with DFT-calculated <sup>13</sup> C NMR data for incorrect structure <b>2a</b> .                                                                           |
| <b>Table S6</b>  | Eucalypcamal K ( <b>2a</b> ) comparative <sup>13</sup> C NMR data with DFT-calculated <sup>13</sup> C NMR data for revised structure <b>2b</b> .                                                                             |
| <b>Table S7</b>  | Eucalypcamal K ( <b>2a</b> ) comparative <sup>1</sup> H NMR data with DFT-calculated <sup>1</sup> H NMR data for incorrect structure <b>2a</b> .                                                                             |
| <b>Table S8</b>  | Eucalypcamal K ( <b>2a</b> ) comparative <sup>1</sup> H NMR data with DFT-calculated <sup>1</sup> H NMR data for incorrect structure <b>2b</b> .                                                                             |
| <b>Table S9</b>  | Comparison of eucalyprobusal C ( <b>1a</b> ) experimental NMR data with diagnostic <sup>1</sup> H and <sup>13</sup> C NMR data fingerprint data for pyrano-diformyl phloroglucinols and oxepine-formyl phloroglucinols.      |
| <b>Table S10</b> | Comparison of eucalypcamal K ( <b>2a</b> ) experimental NMR data with diagnostic <sup>1</sup> H and <sup>13</sup> C NMR data fingerprint data for pyrano-3-acyl-1-formyl phloroglucinols and oxepine-formyl phloroglucinols. |
| <b>Table S11</b> | Eucalyprobusal C incorrect ( <b>1a</b> = Isomer 1 - 0.00%) versus revised ( <b>1b</b> = Isomer 2 - 100.00%) DP4+ output.                                                                                                     |
| <b>Table S12</b> | Eucalypcamal K incorrect ( <b>2a</b> = Isomer 1 - 0.00%) versus revised ( <b>2b</b> = Isomer 2 - 100.00%) DP4+ output.                                                                                                       |
| <b>Figure S1</b> | Classification of subclasses for formyl phloroglucinol meroterpenes (image with adapted from Baxter et al.)                                                                                                                  |
| <b>Table S13</b> | Eucalyprobusal C ( <b>1a</b> ) conformational set, energies, and distributions for GIAO-DFT NMR and TDDFT-ECD calculations.                                                                                                  |
| <b>Table S14</b> | Eucalyprobusal C ( <b>1b</b> ) conformational set, energies, and distributions for GIAO-DFT NMR and TDDFT-ECD calculations.                                                                                                  |
| <b>Table S15</b> | Eucalypcamal K ( <b>2a</b> ) conformational set, energies, and distributions for GIAO-DFT NMR and TDDFT-ECD calculations.                                                                                                    |
| <b>Table S16</b> | Eucalypcamal K ( <b>2b</b> ) conformational set, energies, and distributions for GIAO-DFT NMR and TDDFT-ECD calculations.                                                                                                    |
| <b>Table S17</b> | Eucalyprobusal C ( <b>1a</b> ) DFT geometry optimized conformers calculated at the B3LYP/6-31+G(d,p) level of theory.                                                                                                        |
| <b>Table S18</b> | Eucalyprobusal C ( <b>1b</b> ) DFT geometry optimized conformers calculated at the B3LYP/6-31+G(d,p) level of theory.                                                                                                        |
| <b>Table S19</b> | Eucalypcamal K ( <b>2a</b> ) DFT geometry optimized conformers calculated at the B3LYP/6-31+G(d,p) level of theory.                                                                                                          |
| <b>Table S20</b> | Eucalypcamal K ( <b>2b</b> ) DFT geometry optimized conformers calculated at the B3LYP/6-31+G(d,p) level of theory.                                                                                                          |

## 2. References

**Table S1.** Eucalyprobusal C (**1a**)<sup>1</sup> comparative <sup>13</sup>C NMR data with DFT-calculated <sup>13</sup>C NMR data for incorrect structure **1a**.

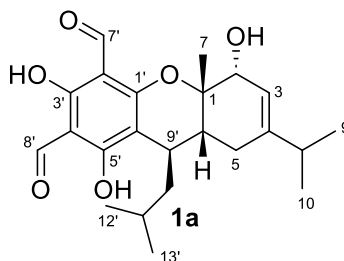

| Pos. | Exp. $\delta_c$ <b>1a</b> <sup>1</sup> | DFT calc. $\delta_c$ <b>1a</b> | Abs. error |
|------|----------------------------------------|--------------------------------|------------|
| 1    | 72.7                                   | 80.9                           | 8.2        |
| 2    | 80.2                                   | 73.7                           | 6.5        |
| 3    | 111.6                                  | 120.9                          | 9.3        |
| 4    | 155.2                                  | 150.0                          | 5.2        |
| 5    | 32.4                                   | 30.6                           | 1.8        |
| 6    | 40.2                                   | 36.3                           | 3.9        |
| 7    | 26.4                                   | 21.3                           | 5.1        |
| 8    | 34.5                                   | 38.5                           | 4.0        |
| 9    | 21.1                                   | 19.9                           | 1.2        |
| 10   | 20.9                                   | 19.8                           | 1.1        |
| 1'   | 165.0                                  | 163.0                          | 2.0        |
| 2'   | 109.1                                  | 104.6                          | 4.5        |
| 3'   | 167.3                                  | 169.1                          | 1.8        |
| 4'   | 105.6                                  | 104.1                          | 1.5        |
| 5'   | 169.1                                  | 171.0                          | 1.9        |
| 6'   | 117.4                                  | 104.5                          | 12.9       |
| 7'   | 193.7                                  | 190.9                          | 2.8        |
| 8'   | 192.3                                  | 191.5                          | 0.8        |
| 9'   | 35.9                                   | 35.8                           | 0.1        |
| 10'  | 46.7                                   | 39.3                           | 7.4        |
| 11'  | 25.6                                   | 27.7                           | 2.1        |
| 12'  | 22.3                                   | 18.9                           | 3.4        |
| 13'  | 22.8                                   | 22.5                           | 0.3        |
|      |                                        | <sup>13</sup> C MAE =          | 3.8        |
|      |                                        | <sup>13</sup> C RMSD =         | 4.96       |

**Table S2.** Eucalyprobusal C (**1a**)<sup>1</sup> comparative <sup>13</sup>C NMR data with DFT-calculated <sup>13</sup>C NMR data for revised structure **1b**.

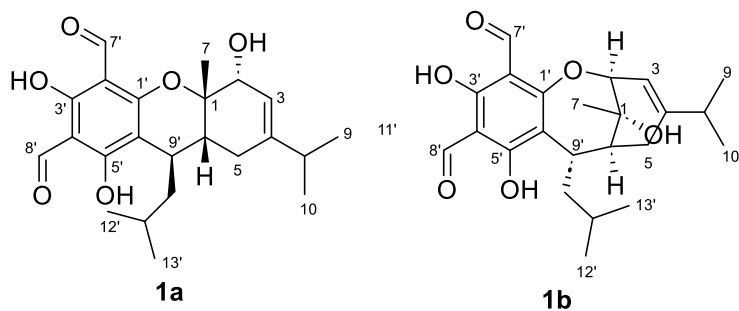

| Pos. | Exp. $\delta_c$ <b>1a</b> <sup>1</sup> | DFT calc. $\delta_c$ <b>1b</b> | Abs. error |
|------|----------------------------------------|--------------------------------|------------|
| 1    | 72.7                                   | 74.2                           | 1.5        |
| 2    | 80.2                                   | 81.7                           | 1.5        |
| 3    | 111.6                                  | 113.1                          | 1.5        |
| 4    | 155.2                                  | 160.2                          | 5.0        |
| 5    | 32.4                                   | 33.4                           | 1.0        |
| 6    | 40.2                                   | 41.6                           | 1.4        |
| 7    | 26.4                                   | 24.8                           | 1.6        |
| 8    | 34.5                                   | 38.7                           | 4.2        |
| 9    | 21.1                                   | 20.2                           | 0.9        |
| 10   | 20.9                                   | 19.4                           | 1.5        |
| 1'   | 165.0                                  | 166.4                          | 1.4        |
| 2'   | 109.1                                  | 109.0                          | 0.1        |
| 3'   | 167.3                                  | 168.7                          | 1.4        |
| 4'   | 105.6                                  | 105.7                          | 0.1        |
| 5'   | 169.1                                  | 170.3                          | 1.2        |
| 6'   | 117.4                                  | 117.1                          | 0.3        |
| 7'   | 193.7                                  | 193.5                          | 0.2        |
| 8'   | 192.3                                  | 192.0                          | 0.3        |
| 9'   | 35.9                                   | 37.7                           | 1.8        |
| 10'  | 46.7                                   | 45.4                           | 1.3        |
| 11'  | 25.6                                   | 28.4                           | 2.8        |
| 12'  | 22.3                                   | 20.2                           | 2.1        |
| 13'  | 22.8                                   | 20.9                           | 1.9        |
|      |                                        | <sup>13</sup> C MAE =          | 1.5        |
|      |                                        | <sup>13</sup> C RMSD =         | 1.92       |

**Table S3.** Eucalyprobusal C (**1a**)<sup>1</sup> comparative <sup>1</sup>H NMR data with DFT-calculated <sup>1</sup>H NMR data for incorrect structure **1a**.

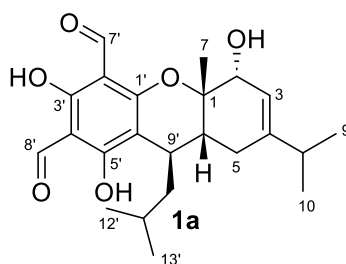

| Pos. | Exp. $\delta_H$ <b>1a</b> <sup>1</sup> | DFT calc. $\delta_H$ <b>1a</b> | Abs. error  |
|------|----------------------------------------|--------------------------------|-------------|
| 2    | 4.49                                   | 4.13                           | 0.03        |
| 3    | 5.10                                   | 5.51                           | 0.16        |
| 5    | 2.62                                   | 2.08                           | 0.17        |
|      | 1.86                                   | 1.74                           | 0.09        |
| 6    | 2.23                                   | 2.33                           | 0.04        |
| 7    | 1.65                                   | 1.75                           | 0.05        |
| 8    | 2.06                                   | 2.31                           | 0.13        |
| 9    | 0.74                                   | 1.07                           | 0.17        |
| 10   | 0.72                                   | 0.99                           | 0.15        |
| 7'   | 10.10                                  | 9.80                           | 0.30        |
| 8'   | 10.21                                  | 10.00                          | 0.21        |
| 9'   | 3.52                                   | 2.76                           | 0.01        |
| 10'  | 1.42                                   | 1.86                           | 0.04        |
|      | 1.27                                   | 1.80                           | 0.07        |
| 11'  | 1.47                                   | 1.89                           | 0.23        |
| 12'  | 0.93                                   | 1.08                           | 0.03        |
| 13'  | 0.85                                   | 1.01                           | 0.09        |
|      |                                        | <sup>1</sup> H MAE =           | <b>0.32</b> |
|      |                                        | <sup>1</sup> H RMSD =          | <b>0.37</b> |

**Table S4.** Eucalyprobusal C (**1a**)<sup>1</sup> comparative <sup>1</sup>H NMR data with DFT-calculated <sup>13</sup>C NMR data for revised structure **1b**.

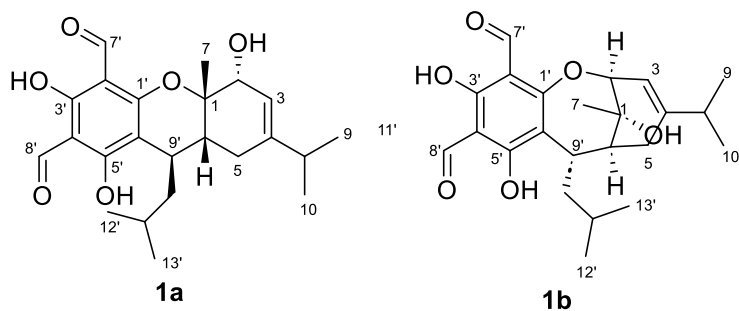

| Pos. | Exp. $\delta_{\text{H}}$ <b>1a</b> <sup>1</sup> | DFT calc. $\delta_{\text{H}}$ <b>1b</b> | Abs. error  |
|------|-------------------------------------------------|-----------------------------------------|-------------|
| 2    | 4.49                                            | 4.52                                    | 0.03        |
| 3    | 5.10                                            | 5.26                                    | 0.16        |
| 5    | 2.62                                            | 2.79                                    | 0.17        |
|      | 1.86                                            | 1.95                                    | 0.09        |
| 6    | 2.23                                            | 2.27                                    | 0.04        |
| 7    | 1.65                                            | 1.60                                    | 0.05        |
| 8    | 2.06                                            | 2.19                                    | 0.13        |
| 9    | 0.74                                            | 0.91                                    | 0.17        |
| 10   | 0.72                                            | 0.87                                    | 0.15        |
| 7'   | 10.10                                           | 9.90                                    | 0.20        |
| 8'   | 10.21                                           | 10.00                                   | 0.11        |
| 9'   | 3.52                                            | 3.53                                    | 0.01        |
| 10'  | 1.42                                            | 1.46                                    | 0.04        |
|      | 1.27                                            | 1.20                                    | 0.07        |
| 11'  | 1.47                                            | 1.70                                    | 0.23        |
| 12'  | 0.93                                            | 0.97                                    | 0.03        |
| 13'  | 0.85                                            | 0.94                                    | 0.09        |
|      |                                                 | <sup>1</sup> H MAE =                    | <b>0.11</b> |
|      |                                                 | <sup>1</sup> H RMSD =                   | <b>0.13</b> |

**Table S5.** Eucalypcamal K (**2a**)<sup>2</sup> comparative <sup>13</sup>C NMR data with DFT-calculated <sup>13</sup>C NMR data for incorrect structure **2a**.

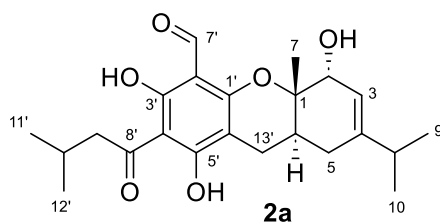

| Pos. | Exp. $\delta_c$ 2a <sup>1</sup> | DFT calc. $\delta_c$ 2a | Abs. error |
|------|---------------------------------|-------------------------|------------|
| 1    | 72.4                            | 83.7                    | 11.3       |
| 2    | 79.9                            | 70.6                    | 9.3        |
| 3    | 112.2                           | 120.3                   | 8.1        |
| 4    | 154.7                           | 153.9                   | 0.8        |
| 5    | 28.8                            | 32.5                    | 3.7        |
| 6    | 36.7                            | 29.4                    | 7.3        |
| 7    | 24.0                            | 15.0                    | 9.0        |
| 8    | 34.5                            | 38.8                    | 4.3        |
| 9    | 21.0                            | 20.2                    | 0.8        |
| 10   | 20.1                            | 19.7                    | 0.4        |
| 1'   | 164.6                           | 161.2                   | 3.4        |
| 2'   | 108.4                           | 104.2                   | 4.2        |
| 3'   | 167.3                           | 169.3                   | 2.0        |
| 4'   | 105.6                           | 103.6                   | 2.0        |
| 5'   | 171.5                           | 171.1                   | 0.4        |
| 6'   | 112.3                           | 101.4                   | 10.9       |
| 7'   | 193.4                           | 190.0                   | 3.4        |
| 8'   | 207.0                           | 206.1                   | 0.9        |
| 9'   | 52.9                            | 53.3                    | 0.4        |
| 10'  | 25.3                            | 26.9                    | 1.6        |
| 11'  | 22.6                            | 26.9                    | 4.3        |
| 12'  | 22.7                            | 21.1                    | 1.6        |
| 13'  | 24.1                            | 22.3                    | 1.8        |
|      |                                 | <sup>13</sup> C MAE =   | 4.0        |
|      |                                 | <sup>13</sup> C RMSD =  | 5.29       |

**Table S6.** Eucalypcamal K (**2a**)<sup>2</sup> comparative <sup>13</sup>C NMR data with DFT-calculated <sup>13</sup>C NMR data for revised **2b**.

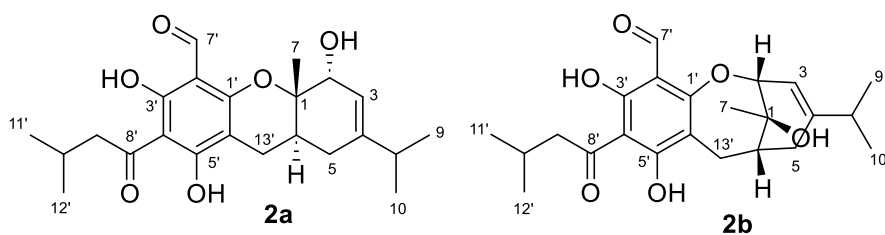

| Pos. | Exp. $\delta_c$ <b>2a</b> <sup>2</sup> | DFT calc. $\delta_c$ <b>2b</b> | Abs. error |
|------|----------------------------------------|--------------------------------|------------|
| 1    | 72.4                                   | 73.7                           | 1.3        |
| 2    | 79.9                                   | 81.1                           | 1.2        |
| 3    | 112.2                                  | 113.8                          | 1.6        |
| 4    | 154.7                                  | 159.9                          | 5.2        |
| 5    | 28.8                                   | 29.8                           | 1.0        |
| 6    | 36.7                                   | 39.3                           | 2.6        |
| 7    | 24.0                                   | 22.5                           | 1.5        |
| 8    | 34.5                                   | 38.6                           | 4.1        |
| 9    | 21.0                                   | 20.1                           | 0.9        |
| 10   | 20.1                                   | 19.7                           | 0.4        |
| 1'   | 164.6                                  | 165.3                          | 0.7        |
| 2'   | 108.4                                  | 108.2                          | 0.2        |
| 3'   | 167.3                                  | 169.0                          | 1.7        |
| 4'   | 105.6                                  | 105.4                          | 0.2        |
| 5'   | 171.5                                  | 172.0                          | 0.5        |
| 6'   | 112.3                                  | 112.0                          | 0.3        |
| 7'   | 193.4                                  | 192.7                          | 0.7        |
| 8'   | 207.0                                  | 206.6                          | 0.4        |
| 9'   | 52.9                                   | 53.3                           | 0.4        |
| 10'  | 25.3                                   | 27.1                           | 1.8        |
| 11'  | 22.6                                   | 20.8                           | 1.8        |
| 12'  | 22.7                                   | 21.0                           | 1.7        |
| 13'  | 24.1                                   | 25.3                           | 1.2        |
|      |                                        | <sup>13</sup> C MAE =          | 1.4        |
|      |                                        | <sup>13</sup> C RMSD =         | 1.82       |

**Table S7.** Eucalypcamal K (**2a**)<sup>2</sup> comparative <sup>1</sup>H NMR data with DFT-calculated <sup>1</sup>H NMR data for incorrect structure **2a**.

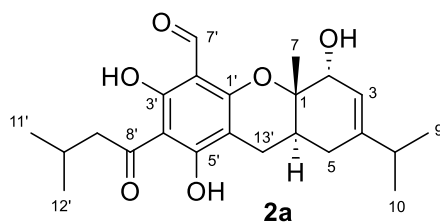

| Pos. | Exp. $\delta_H$ 2a <sup>2</sup> | DFT calc. $\delta_H$ 2a | Abs. error  |
|------|---------------------------------|-------------------------|-------------|
| 2    | 4.51                            | 4.20                    | 0.31        |
| 3    | 5.16                            | 5.74                    | 0.58        |
| 5    | 1.96                            | 1.93                    | 0.03        |
|      | 2.42                            | 2.49                    | 0.07        |
| 6    | 2.21                            | 2.47                    | 0.26        |
| 7    | 1.58                            | 1.20                    | 0.38        |
| 8    | 2.05                            | 2.42                    | 0.37        |
| 9    | 0.71                            | 1.12                    | 0.41        |
| 10   | 0.70                            | 1.10                    | 0.40        |
| 7'   | 10.05                           | 9.84                    | 0.21        |
| 9'   | 2.92                            | 3.03                    | 0.11        |
|      | 3.05                            | 3.06                    | 0.01        |
| 10'  | 2.21                            | 2.37                    | 0.16        |
| 11'  | 0.96                            | 1.06                    | 0.10        |
| 12'  | 0.94                            | 1.05                    | 0.11        |
| 13'  | 2.28                            | 2.19                    | 0.09        |
|      | 3.34                            | 2.81                    | 0.53        |
|      |                                 | <sup>1</sup> H MAE =    | <b>0.24</b> |
|      |                                 | <sup>1</sup> H RMSD =   | <b>0.30</b> |



**Table S8.** Eucalypcamal K (**2a**)<sup>2</sup> comparative <sup>1</sup>H NMR data with DFT-calculated <sup>1</sup>H NMR data for revised **2b**.

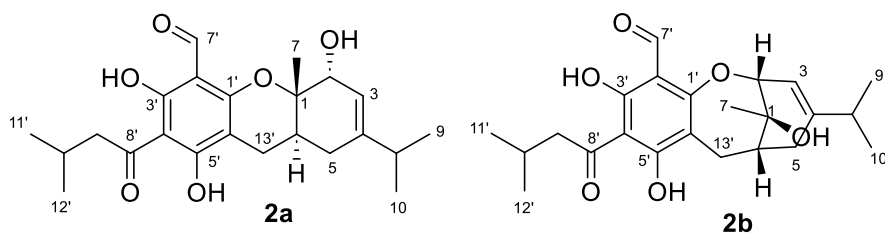

| Pos. | Exp. $\delta_H$ 2a <sup>2</sup> | DFT calc. $\delta_H$ 2b | Abs. error |
|------|---------------------------------|-------------------------|------------|
| 2    | 4.51                            | 4.56                    | 0.05       |
| 3    | 5.16                            | 5.36                    | 0.20       |
| 5    | 1.96                            | 2.04                    | 0.08       |
|      | 2.42                            | 2.58                    | 0.16       |
| 6    | 2.21                            | 2.20                    | 0.01       |
| 7    | 1.58                            | 1.54                    | 0.04       |
| 8    | 2.05                            | 2.19                    | 0.14       |
| 9    | 0.71                            | 0.91                    | 0.20       |
| 10   | 0.70                            | 0.85                    | 0.15       |
| 7'   | 10.05                           | 9.88                    | 0.17       |
| 9'   | 2.92                            | 3.02                    | 0.10       |
|      | 3.05                            | 3.06                    | 0.01       |
| 10'  | 2.21                            | 2.35                    | 0.14       |
| 11'  | 0.96                            | 1.04                    | 0.08       |
| 12'  | 0.94                            | 1.03                    | 0.09       |
| 13'  | 2.28                            | 2.31                    | 0.03       |
|      | 3.34                            | 3.38                    | 0.04       |
|      |                                 | <sup>1</sup> H MAE =    | 0.10       |
|      |                                 | <sup>1</sup> H RMSD =   | 0.12       |

**Table S9.** Comparison of eucalyprobusal C (**1a**) experimental data with pyrano-diformyl phloroglucinols and oxepine-formyl phloroglucinols (NMR data adapted from Tables S04 and S09 from our publication Baxter et al. – <https://doi.org/10.1021/acs.jnatprod.3c00139>).<sup>3</sup>

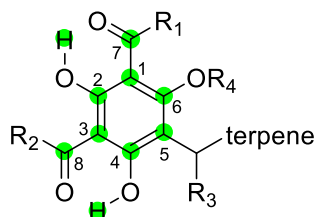

R<sub>1</sub> = H or carbon chain

R<sub>2</sub> = H or carbon chain

R<sub>3</sub> = alkyl group

R<sub>4</sub> = H or terpene

| pyrano-diformyl<br>phloroglucinols  | C-1     | C-2   | C-3   | C-4   | C-5      | C-6   | C-7     | H-7   | C-8   | H-8   |
|-------------------------------------|---------|-------|-------|-------|----------|-------|---------|-------|-------|-------|
| Eucalyprobusal C ( <b>1a</b> )      | 109.1   | 167.3 | 105.6 | 169.1 | 117.4    | 165.0 | 193.7   | 10.10 | 192.3 | 10.21 |
| Lower Limit                         | 103.6   | 166.9 | 103.4 | 167.5 | 104.9    | 160.8 | 190.2   | 9.96  | 191.3 | 10.00 |
| Upper Limit                         | 106.9   | 168.5 | 106.0 | 171.4 | 114.1    | 166.6 | 192.7   | 10.27 | 192.9 | 10.27 |
| Upper and lower limit abs.<br>error | 2.2-5.5 |       |       |       | 3.3-12.5 |       | 3.5-1.0 |       |       |       |

| oxepine-formyl<br>phloroglucinols   | C-1     | C-2   | C-3   | C-4     | C-5   | C-6   | C-7   | H-7   | C-8   | H-8   |
|-------------------------------------|---------|-------|-------|---------|-------|-------|-------|-------|-------|-------|
| Eucalyprobusal C ( <b>1a</b> )      | 109.1   | 167.3 | 105.6 | 169.1   | 117.4 | 165.0 | 193.7 | 10.10 | 192.3 | 10.21 |
| Lower Limit                         | 107.6   | 167.2 | 104.6 | 169.5   | 115.9 | 165.0 | 193.3 | 10.09 | 192.1 | 10.20 |
| Upper Limit                         | 108.8   | 167.8 | 106.1 | 170.5   | 117.8 | 168.4 | 193.7 | 10.24 | 192.8 | 10.27 |
| Upper and lower limit abs.<br>error | 0.3-2.2 |       |       | 0.4-1.4 |       |       |       |       |       |       |

**Table S10.** Comparison of eucalypcamal K (**2a**) experimental data with pyrano-3-acyl-1-formyl phloroglucinols and oxepine-formyl phloroglucinols (NMR data adapted from Tables S02 and S09 from our publication Baxter et al. - <https://doi.org/10.1021/acs.jnatprod.3c00139>).<sup>3</sup>

| pyrano-3-acyl-1-formyl phloroglucinols | C-1     | C-2   | C-3     | C-4   | C-5       | C-6     | C-7     | H-7   |
|----------------------------------------|---------|-------|---------|-------|-----------|---------|---------|-------|
| Eucalypcamal K ( <b>2a</b> )           | 108.4   | 167.4 | 105.6   | 171.5 | 112.3     | 164.6   | 193.4   | 10.05 |
| Lower Limit                            | 103.7   | 168.0 | 103.1   | 170.9 | 98.5      | 160.4   | 191.4   | 9.91  |
| Upper Limit                            | 104.4   | 168.4 | 103.9   | 172.1 | 102.0     | 164.3   | 192.0   | 10.05 |
| Upper and lower limit abs. error       | 4.0-4.7 |       | 1.7-2.5 |       | 10.3-13.8 | 0.3-4.3 | 1.4-2.0 |       |

| oxepine-formyl phloroglucinols   | C-1   | C-2   | C-3   | C-4     | C-5     | C-6     | C-7   | H-7       |
|----------------------------------|-------|-------|-------|---------|---------|---------|-------|-----------|
| Eucalypcamal K ( <b>2a</b> )     | 108.4 | 167.4 | 105.6 | 171.5   | 112.3   | 164.6   | 193.4 | 10.05     |
| Lower Limit                      | 107.6 | 167.2 | 104.6 | 169.5   | 115.9   | 166.9   | 193.3 | 10.09     |
| Upper Limit                      | 108.8 | 167.8 | 106.1 | 170.5   | 117.8   | 168.4   | 193.6 | 10.24     |
| Upper and lower limit abs. error |       |       |       | 1.0-2.0 | 3.6-5.5 | 2.3-3.8 |       | 0.04-0.19 |

**Table S11.** Eucalyprobusal C incorrect (**1a** = Isomer 1- 0.00%) versus revised (**1b** = Isomer 2 – 100.00%) DP4+ output.<sup>4</sup>

| Functional<br>mPW1PW91 | Solvent?<br>PCM              |                                | Basis Set<br>6-311+G(d,p) |          | Type of Data<br>Shielding Tensors |          |
|------------------------|------------------------------|--------------------------------|---------------------------|----------|-----------------------------------|----------|
|                        | Isomer 1                     | Isomer 2                       | Isomer 3                  | Isomer 4 | Isomer 5                          | Isomer 6 |
| sDP4+ (H data)         | <div><div></div></div> 0.00% | <div><div></div></div> 100.00% | -                         | -        | -                                 | -        |
| sDP4+ (C data)         | <div><div></div></div> 0.00% | <div><div></div></div> 100.00% | -                         | -        | -                                 | -        |
| sDP4+ (all data)       | <div><div></div></div> 0.00% | <div><div></div></div> 100.00% | -                         | -        | -                                 | -        |
| uDP4+ (H data)         | <div><div></div></div> 0.01% | <div><div></div></div> 99.99%  | -                         | -        | -                                 | -        |
| uDP4+ (C data)         | <div><div></div></div> 0.00% | <div><div></div></div> 100.00% | -                         | -        | -                                 | -        |
| uDP4+ (all data)       | <div><div></div></div> 0.00% | <div><div></div></div> 100.00% | -                         | -        | -                                 | -        |
| DP4+ (H data)          | <div><div></div></div> 0.00% | <div><div></div></div> 100.00% | -                         | -        | -                                 | -        |
| DP4+ (C data)          | <div><div></div></div> 0.00% | <div><div></div></div> 100.00% | -                         | -        | -                                 | -        |
| DP4+ (all data)        | <div><div></div></div> 0.00% | <div><div></div></div> 100.00% | -                         | -        | -                                 | -        |

**Table S12.** Eucalypcamal K incorrect (**2a** = Isomer 1 - 0.00%) versus revised (**2b** = Isomer 2 - 100.00%) DP4+ output.<sup>4</sup>

| Functional       | Solvent?                     |                                | Basis Set    |          | Type of Data      |          |
|------------------|------------------------------|--------------------------------|--------------|----------|-------------------|----------|
| mPW1PW91         | PCM                          |                                | 6-311+G(d,p) |          | Shielding Tensors |          |
|                  | Isomer 1                     | Isomer 2                       | Isomer 3     | Isomer 4 | Isomer 5          | Isomer 6 |
| sDP4+ (H data)   | <div><div></div></div> 0.00% | <div><div></div></div> 100.00% | -            | -        | -                 | -        |
| sDP4+ (C data)   | <div><div></div></div> 0.00% | <div><div></div></div> 100.00% | -            | -        | -                 | -        |
| sDP4+ (all data) | <div><div></div></div> 0.00% | <div><div></div></div> 100.00% | -            | -        | -                 | -        |
| uDP4+ (H data)   | <div><div></div></div> 0.15% | <div><div></div></div> 99.85%  | -            | -        | -                 | -        |
| uDP4+ (C data)   | <div><div></div></div> 0.00% | <div><div></div></div> 100.00% | -            | -        | -                 | -        |
| uDP4+ (all data) | <div><div></div></div> 0.00% | <div><div></div></div> 100.00% | -            | -        | -                 | -        |
| DP4+ (H data)    | <div><div></div></div> 0.00% | <div><div></div></div> 100.00% | -            | -        | -                 | -        |
| DP4+ (C data)    | <div><div></div></div> 0.00% | <div><div></div></div> 100.00% | -            | -        | -                 | -        |
| DP4+ (all data)  | <div><div></div></div> 0.00% | <div><div></div></div> 100.00% | -            | -        | -                 | -        |

**Figure S1.** Classification of subclasses for formyl phloroglucinol meroterpenes (image adapted from our publication Baxter et al. - <https://doi.org/10.1021/acs.jnatprod.3c00139>).<sup>3</sup>

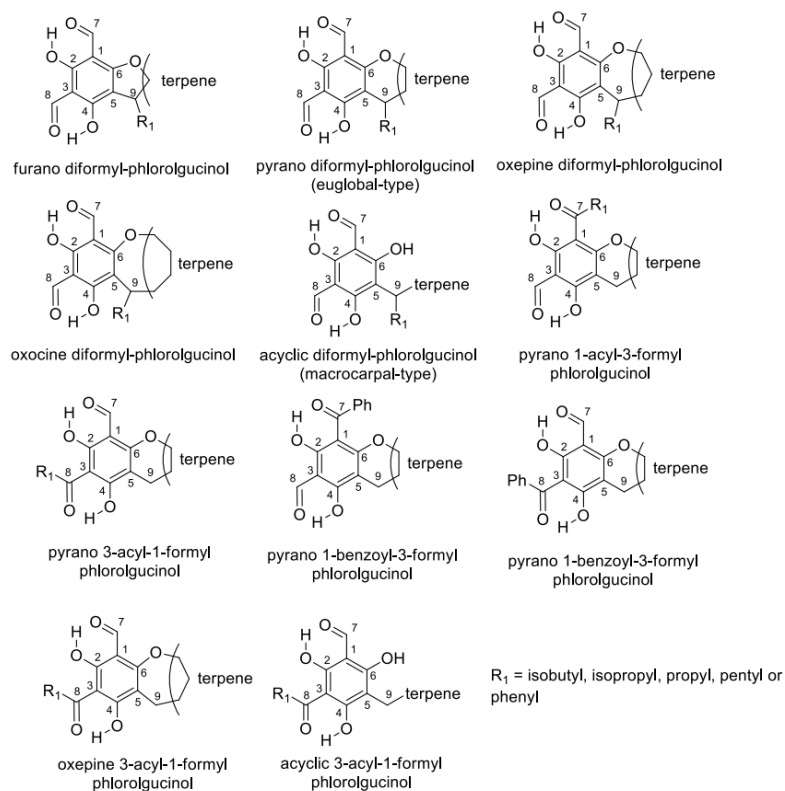

**Table S13.** Eucalyprobusal C (**1a**) conformational set, energies, and distributions for GIAO-DFT NMR and TDDFT-ECD calculations.

| Conformer Number (1a) | Energy (a.u.) | Energy (kcal/mol) | Relative Energy (kcal/mol) | Boltzmann Factor | Equilibrium Mole Fraction |
|-----------------------|---------------|-------------------|----------------------------|------------------|---------------------------|
| 9                     | -1345.526978  | -844330.8145      | 0                          | 1.000            | 0.350                     |
| 24                    | -1345.526167  | -844330.3056      | 0.508910116                | 0.423            | 0.148                     |
| 12                    | -1345.526117  | -844330.2743      | 0.540285586                | 0.401            | 0.140                     |
| 4                     | -1345.525285  | -844329.7522      | 1.062373399                | 0.166            | 0.058                     |
| 11                    | -1345.525213  | -844329.707       | 1.107554075                | 0.154            | 0.054                     |
| 2                     | -1345.524797  | -844329.4459      | 1.368597982                | 0.099            | 0.035                     |
| 3                     | -1345.524691  | -844329.3794      | 1.435113977                | 0.088            | 0.031                     |
| 6                     | -1345.524157  | -844329.0443      | 1.770203992                | 0.050            | 0.018                     |
| 5                     | -1345.523841  | -844328.846       | 1.96849696                 | 0.036            | 0.013                     |

*\*conformational sets shown filtered for duplicate conformers, imaginary frequencies, and energies >3.0 kcal/mol*

**Table S14.** Eucalyprobusal C (**1b**) conformational set, energies, and distributions for GIAO-DFT NMR and TDDFT-ECD calculations.

| Conformer Number (1b) | Energy (a.u.) | Energy (kcal/mol) | Relative Energy (kcal/mol) | Boltzmann Factor | Equilibrium Mole Fraction |
|-----------------------|---------------|-------------------|----------------------------|------------------|---------------------------|
| 4                     | -1345.509007  | -844319.5376      | 0                          | 1.000            | 0.137                     |
| 1                     | -1345.508787  | -844319.3995      | 0.138052066                | 0.792            | 0.108                     |
| 19                    | -1345.508582  | -844319.2709      | 0.266691491                | 0.637            | 0.087                     |
| 3                     | -1345.508365  | -844319.1347      | 0.402861029                | 0.506            | 0.069                     |
| 8                     | -1345.508348  | -844319.124       | 0.413528689                | 0.497            | 0.068                     |
| 20                    | -1345.508316  | -844319.104       | 0.433608989                | 0.481            | 0.066                     |
| 9                     | -1345.508304  | -844319.0964      | 0.441139102                | 0.475            | 0.065                     |
| 6                     | -1345.508262  | -844319.0701      | 0.467494496                | 0.454            | 0.062                     |
| 10                    | -1345.508115  | -844318.9778      | 0.559738377                | 0.388            | 0.053                     |
| 27                    | -1345.507869  | -844318.8235      | 0.714105687                | 0.299            | 0.041                     |
| 16                    | -1345.507812  | -844318.7877      | 0.749873722                | 0.282            | 0.038                     |
| 17                    | -1345.507677  | -844318.703       | 0.83458749                 | 0.244            | 0.033                     |
| 28                    | -1345.507671  | -844318.6992      | 0.838352546                | 0.243            | 0.033                     |
| 24                    | -1345.507643  | -844318.6816      | 0.855922809                | 0.235            | 0.032                     |
| 13                    | -1345.507594  | -844318.6509      | 0.88667077                 | 0.224            | 0.031                     |
| 14                    | -1345.507285  | -844318.457       | 1.080571171                | 0.161            | 0.022                     |
| 5                     | -1345.505506  | -844317.3407      | 2.196910378                | 0.024            | 0.003                     |
| 21                    | -1345.505089  | -844317.079       | 2.458581794                | 0.016            | 0.002                     |
| 11                    | -1345.505033  | -844317.0438      | 2.49372232                 | 0.015            | 0.002                     |
| 23                    | -1345.504925  | -844316.9761      | 2.561493334                | 0.013            | 0.002                     |
| 7                     | -1345.504814  | -844316.9064      | 2.631146877                | 0.012            | 0.002                     |
| 29                    | -1345.50446   | -844316.6843      | 2.853285201                | 0.008            | 0.001                     |
| 31                    | -1345.504301  | -844316.5845      | 2.953059194                | 0.007            | 0.001                     |

*\*conformational sets shown filtered for duplicate conformers, imaginary frequencies, and energies >3.0 kcal/mol*

**Table S15.** Eucalypcamal K (**2a**) conformational set, energies, and distributions for GIAO-DFT NMR and TDDFT-ECD calculations.

| Conformer Number 2a | Energy (a.u.) | Energy (kcal/mol) | Relative Energy (kcal/mol) | Boltzmann Factor | Equilibrium Mole Fraction |
|---------------------|---------------|-------------------|----------------------------|------------------|---------------------------|
| 12                  | -1345.542744  | -844340.7079      | 0                          | 1.000            | 0.070                     |
| 26                  | -1345.542741  | -844340.706       | 0.001882528                | 0.997            | 0.070                     |
| 23                  | -1345.542656  | -844340.6526      | 0.055220826                | 0.911            | 0.064                     |
| 7                   | -1345.54199   | -844340.2347      | 0.473142081                | 0.450            | 0.031                     |
| 33                  | -1345.541887  | -844340.1701      | 0.537775548                | 0.403            | 0.028                     |
| 8                   | -1345.541856  | -844340.1506      | 0.557228339                | 0.390            | 0.027                     |
| 29                  | -1345.541801  | -844340.1161      | 0.591741356                | 0.368            | 0.026                     |
| 20                  | -1345.541709  | -844340.0584      | 0.64947222                 | 0.334            | 0.023                     |
| 22                  | -1345.541699  | -844340.0521      | 0.655747314                | 0.330            | 0.023                     |
| 24                  | -1345.541079  | -844339.663       | 1.044803136                | 0.171            | 0.012                     |
| 54                  | -1345.541075  | -844339.6605      | 1.047313174                | 0.170            | 0.012                     |
| 46                  | -1345.540905  | -844339.5539      | 1.15398977                 | 0.142            | 0.010                     |
| 43                  | -1345.540901  | -844339.5514      | 1.156499808                | 0.142            | 0.010                     |
| 64                  | -1345.540159  | -844339.0857      | 1.622111776                | 0.065            | 0.005                     |
| 71                  | -1345.540108  | -844339.0537      | 1.654114755                | 0.061            | 0.004                     |
| 79                  | -1345.539553  | -844338.7055      | 2.002382467                | 0.034            | 0.002                     |
| 80                  | -1345.539423  | -844338.6239      | 2.083958688                | 0.030            | 0.002                     |
| 10                  | -1345.539405  | -844338.6126      | 2.095253857                | 0.029            | 0.002                     |
| 72                  | -1345.539309  | -844338.5524      | 2.155494758                | 0.026            | 0.002                     |
| 38                  | -1345.539277  | -844338.5323      | 2.175575059                | 0.025            | 0.002                     |
| 60                  | -1345.539133  | -844338.4419      | 2.265936411                | 0.022            | 0.002                     |
| 86                  | -1345.53912   | -844338.4338      | 2.274094033                | 0.021            | 0.001                     |
| 28                  | -1345.538794  | -844338.2292      | 2.478662094                | 0.015            | 0.001                     |
| 62                  | -1345.538607  | -844338.1118      | 2.596006351                | 0.012            | 0.001                     |
| 87                  | -1345.538599  | -844338.1068      | 2.601026426                | 0.012            | 0.001                     |
| 73                  | -1345.538376  | -844337.9669      | 2.74096102                 | 0.010            | 0.001                     |
| 18                  | -1345.53837   | -844337.9631      | 2.744726076                | 0.010            | 0.001                     |
| 83                  | -1345.538365  | -844337.96        | 2.747863623                | 0.010            | 0.001                     |

*\*conformational sets shown filtered for duplicate conformers, imaginary frequencies, and energies >3.0 kcal/mol*

**Table S16.** Eucalypcamal K (**2b**) conformational set, energies, and distributions for GIAO-DFT NMR and TDDFT-ECD calculations.

| Conformer Number (2b) | Energy (a.u.) | Energy (kcal/mol) | Relative Energy (kcal/mol) | Boltzmann Factor | Equilibrium Mole Fraction |
|-----------------------|---------------|-------------------|----------------------------|------------------|---------------------------|
| 16                    | -1345.527498  | -844331.1408      | 0                          | 1                | 0.058418228               |
| 12                    | -1345.527361  | -844331.0549      | 0.085968787                | 0.864797634      | 0.050519945               |
| 43                    | -1345.52685   | -844330.7342      | 0.406626085                | 0.503048844      | 0.029387222               |
| 35                    | -1345.526751  | -844330.6721      | 0.468749515                | 0.452921376      | 0.026458864               |
| 53                    | -1345.526744  | -844330.6677      | 0.473142081                | 0.449572223      | 0.026263213               |
| 11                    | -1345.526708  | -844330.6451      | 0.495732419                | 0.432735234      | 0.025279626               |
| 13                    | -1345.526678  | -844330.6263      | 0.514557701                | 0.419187103      | 0.024488168               |
| 23                    | -1345.526671  | -844330.6219      | 0.518950266                | 0.416087401      | 0.024307089               |
| 15                    | -1345.526547  | -844330.5441      | 0.596761431                | 0.364825574      | 0.021312464               |
| 17                    | -1345.526539  | -844330.5391      | 0.601781506                | 0.361744094      | 0.021132449               |
| 52                    | -1345.52646   | -844330.4895      | 0.651354748                | 0.332677688      | 0.019434441               |
| 31                    | -1345.526396  | -844330.4493      | 0.691515349                | 0.310851575      | 0.018159398               |
| 61                    | -1345.526115  | -844330.273       | 0.867845488                | 0.230759033      | 0.013480534               |
| 58                    | -1345.525902  | -844330.1393      | 1.001504988                | 0.184109782      | 0.010755367               |
| 5                     | -1345.525834  | -844330.0967      | 1.044175627                | 0.171302756      | 0.010007203               |
| 30                    | -1345.525828  | -844330.0929      | 1.047940683                | 0.170216431      | 0.009943742               |
| 45                    | -1345.525828  | -844330.0929      | 1.047940683                | 0.170216431      | 0.009943742               |
| 69                    | -1345.52582   | -844330.0879      | 1.052960758                | 0.168778707      | 0.009859753               |
| 56                    | -1345.525799  | -844330.0747      | 1.066138455                | 0.165062194      | 0.009642641               |
| 21                    | -1345.52577   | -844330.0565      | 1.084336228                | 0.16006403       | 0.009350657               |
| 38                    | -1345.525727  | -844330.0295      | 1.111319131                | 0.152930175      | 0.00893391                |
| 47                    | -1345.525705  | -844330.0157      | 1.125124338                | 0.149404152      | 0.008727926               |
| 42                    | -1345.525678  | -844329.9988      | 1.142067092                | 0.145187677      | 0.008481607               |
| 57                    | -1345.525577  | -844329.9354      | 1.20544554                 | 0.130443206      | 0.007620261               |
| 40                    | -1345.525057  | -844329.6091      | 1.531750423                | 0.075157586      | 0.004390573               |
| 63                    | -1345.525057  | -844329.6091      | 1.531750423                | 0.075157586      | 0.004390573               |
| 59                    | -1345.524969  | -844329.5539      | 1.58697125                 | 0.068462183      | 0.003999439               |
| 36                    | -1345.524962  | -844329.5495      | 1.591363816                | 0.067955936      | 0.003969865               |
| 50                    | -1345.524903  | -844329.5125      | 1.62838687                 | 0.063835048      | 0.00372913                |
| 51                    | -1345.524705  | -844329.3882      | 1.752633729                | 0.051746921      | 0.003022963               |
| 6                     | -1345.523972  | -844328.9282      | 2.212598113                | 0.023787786      | 0.00138964                |
| 60                    | -1345.523546  | -844328.6609      | 2.479917113                | 0.015142247      | 0.000884583               |
| 32                    | -1345.523419  | -844328.5812      | 2.559610806                | 0.013234563      | 0.00077314                |
| 9                     | -1345.52336   | -844328.5442      | 2.59663386                 | 0.012432011      | 0.000726256               |
| 46                    | -1345.523229  | -844328.462       | 2.67883759                 | 0.010819788      | 0.000632073               |

*\*conformational sets filtered for duplicate conformers, imaginary frequencies, and energies >3.0 kcal/mol*

**Table S17.** Eucalyprobusal C (**1a**) DFT-geometry optimized conformers calculated at the B3LYP/6-31+G(d,p) level of theory.

**Conformer 2:**

|   |           |           |           |
|---|-----------|-----------|-----------|
| C | -2.950458 | -1.827436 | 0.038254  |
| C | -3.308839 | -0.618545 | 0.677654  |
| C | -2.368646 | 0.455484  | 0.674008  |
| C | -1.109088 | 0.372440  | 0.040681  |
| C | -0.778959 | -0.852768 | -0.547665 |
| C | -1.682247 | -1.963833 | -0.580602 |
| C | -0.124231 | 1.532432  | 0.124310  |
| C | 1.296890  | 1.004016  | -0.203819 |
| O | 0.431799  | -1.093272 | -1.097379 |
| H | 1.949286  | 1.844096  | -0.466655 |
| C | -1.349674 | -3.203203 | -1.239714 |
| C | -4.581149 | -0.467642 | 1.343879  |
| O | -4.920142 | 0.570964  | 1.941563  |
| O | -3.821097 | -2.835107 | 0.027738  |
| O | -2.672790 | 1.584785  | 1.315229  |
| O | -2.115784 | -4.185433 | -1.276861 |
| C | -0.594324 | 2.788161  | -0.661446 |
| C | 0.280145  | 4.053603  | -0.519151 |
| C | -0.292983 | 5.175180  | -1.401850 |
| C | 0.409331  | 4.531243  | 0.936640  |
| C | 1.876640  | 0.323041  | 1.057883  |
| C | 3.123731  | -0.503904 | 0.845114  |
| C | 3.470918  | -0.890512 | -0.389791 |
| C | 2.708754  | -0.554394 | -1.643165 |
| C | 3.916926  | -0.855466 | 2.097541  |
| C | 3.094757  | -1.758329 | 3.045299  |
| C | 5.290671  | -1.483868 | 1.827901  |
| C | 1.297130  | 0.047466  | -1.412087 |
| C | 0.801650  | 0.639782  | -2.737543 |
| O | 2.655399  | -1.676266 | -2.528191 |
| H | -0.106898 | 1.834453  | 1.178903  |
| H | -0.372480 | -3.268677 | -1.736935 |
| H | -5.269253 | -1.323801 | 1.311927  |
| H | -3.382462 | -3.593567 | -0.465598 |
| H | -3.591403 | 1.466148  | 1.706530  |
| H | -0.696863 | 2.555161  | -1.724500 |
| H | -1.600318 | 3.033479  | -0.304384 |
| H | 1.291080  | 3.833722  | -0.892881 |
| H | 0.333390  | 6.072973  | -1.356114 |
| H | -0.360034 | 4.865784  | -2.451133 |
| H | -1.301228 | 5.454983  | -1.072019 |
| H | 0.988680  | 5.459728  | 0.989765  |
| H | 0.911728  | 3.797245  | 1.575284  |
| H | -0.578633 | 4.727953  | 1.370846  |
| H | 2.084227  | 1.106377  | 1.799495  |
| H | 1.102247  | -0.307448 | 1.515593  |
| H | 4.370518  | -1.473313 | -0.566383 |
| H | 3.272415  | 0.197516  | -2.211796 |
| H | 4.088825  | 0.094175  | 2.629202  |
| H | 3.658137  | -1.959728 | 3.962722  |
| H | 2.145025  | -1.299703 | 3.336160  |
| H | 2.874565  | -2.719042 | 2.565546  |
| H | 5.827530  | -1.625602 | 2.771574  |
| H | 5.907772  | -0.850835 | 1.182193  |
| H | 5.197953  | -2.467327 | 1.352993  |
| H | 1.301842  | 1.591223  | -2.943649 |
| H | 1.032817  | -0.058086 | -3.545918 |
| H | -0.275495 | 0.812059  | -2.729043 |
| H | 2.176276  | -2.383012 | -2.072493 |

**Conformer 3:**

|   |           |           |           |
|---|-----------|-----------|-----------|
| C | -3.042951 | -1.631559 | 0.277203  |
| C | -3.283241 | -0.319862 | 0.747641  |
| C | -2.252421 | 0.654416  | 0.591136  |
| C | -1.016012 | 0.371547  | -0.026146 |

|   |           |           |           |
|---|-----------|-----------|-----------|
| C | -0.811988 | -0.939281 | -0.464581 |
| C | -1.807132 | -1.960811 | -0.335723 |
| C | 0.068171  | 1.439049  | -0.087028 |
| C | 1.425180  | 0.757543  | -0.402574 |
| O | 0.352611  | -1.341651 | -1.018406 |
| H | 2.123761  | 1.512825  | -0.781983 |
| C | -1.599293 | -3.300558 | -0.828178 |
| C | -4.526724 | 0.036324  | 1.389701  |
| O | -4.763727 | 1.175765  | 1.832638  |
| O | -3.996232 | -2.551266 | 0.415108  |
| O | -2.443866 | 1.888750  | 1.059349  |
| O | -2.447004 | -4.207795 | -0.722627 |
| C | -0.284976 | 2.661662  | -0.993491 |
| C | -0.101639 | 4.033646  | -0.312046 |
| C | 1.365274  | 4.325522  | 0.043996  |
| C | -0.671364 | 5.150071  | -1.200424 |
| C | 2.014297  | 0.160932  | 0.896078  |
| C | 3.165745  | -0.797655 | 0.706033  |
| C | 3.408201  | -1.336920 | -0.496299 |
| C | 2.621371  | -1.050600 | -1.746360 |
| C | 4.026752  | -1.143078 | 1.912754  |
| C | 4.882270  | 0.054277  | 2.376726  |
| C | 3.195202  | -1.706870 | 3.082055  |
| C | 1.278817  | -0.311960 | -1.503362 |
| C | 0.738238  | 0.184832  | -2.849488 |
| O | 2.429004  | -2.238026 | -2.518894 |
| H | 0.148621  | 1.836021  | 0.933697  |
| H | -0.643704 | -3.517112 | -1.324753 |
| H | -5.287540 | -0.751087 | 1.483398  |
| H | -3.637317 | -3.403948 | 0.021504  |
| H | -3.363186 | 1.912086  | 1.464910  |
| H | 0.326450  | 2.645733  | -1.902798 |
| H | -1.325999 | 2.579868  | -1.322951 |
| H | -0.683296 | 4.014418  | 0.619730  |
| H | 1.459524  | 5.296388  | 0.542966  |
| H | 1.787063  | 3.572375  | 0.718739  |
| H | 1.989768  | 4.355741  | -0.858593 |
| H | -0.577513 | 6.127844  | -0.714793 |
| H | -1.732451 | 4.984136  | -1.417132 |
| H | -0.137658 | 5.203542  | -2.158261 |
| H | 2.323800  | 0.995678  | 1.537198  |
| H | 1.219217  | -0.350851 | 1.456001  |
| H | 4.238496  | -2.028179 | -0.633388 |
| H | 3.214854  | -0.404169 | -2.406539 |
| H | 4.718868  | -1.931285 | 1.588954  |
| H | 5.549107  | -0.249321 | 3.191304  |
| H | 5.499845  | 0.440908  | 1.559448  |
| H | 4.262385  | 0.876201  | 2.752599  |
| H | 3.854575  | -2.034460 | 3.893105  |
| H | 2.594978  | -2.566881 | 2.766524  |
| H | 2.516562  | -0.952899 | 3.496792  |
| H | 1.359259  | 0.999905  | -3.233311 |
| H | 0.769887  | -0.638642 | -3.566823 |
| H | -0.289284 | 0.544660  | -2.772983 |
| H | 1.923962  | -2.859722 | -1.975657 |

**Conformer 4:**

|   |           |           |           |
|---|-----------|-----------|-----------|
| C | 3.125586  | -1.640159 | -0.218953 |
| C | 3.376576  | -0.371799 | -0.790713 |
| C | 2.358230  | 0.624676  | -0.704335 |
| C | 1.124028  | 0.408171  | -0.053001 |
| C | 0.901114  | -0.871132 | 0.466481  |
| C | 1.886227  | -1.909715 | 0.414581  |
| C | 0.052903  | 1.492033  | -0.048048 |
| C | -1.317028 | 0.837970  | 0.272056  |
| O | -0.274117 | -1.235502 | 1.024532  |
| H | -2.023133 | 1.609067  | 0.599744  |
| C | 1.663435  | -3.208041 | 1.002465  |
| C | 4.617426  | -0.084831 | -1.471345 |
| O | 4.862487  | 1.009925  | -2.012062 |
| O | 4.069640  | -2.577035 | -0.286304 |

|   |           |           |           |
|---|-----------|-----------|-----------|
| O | 2.560893  | 1.809678  | -1.281974 |
| O | 2.502112  | -4.129119 | 0.965444  |
| C | 0.444483  | 2.731383  | 0.803970  |
| C | -0.523591 | 3.933961  | 0.750333  |
| C | -0.018225 | 5.041750  | 1.689981  |
| C | -0.715282 | 4.484823  | -0.672368 |
| C | -1.875662 | 0.197094  | -1.019223 |
| C | -3.028929 | -0.760750 | -0.839986 |
| C | -3.313017 | -1.259943 | 0.369681  |
| C | -2.574079 | -0.914223 | 1.634321  |
| C | -3.803437 | -1.107019 | -2.105392 |
| C | -4.540177 | -2.453052 | -2.051023 |
| C | -4.785338 | 0.027049  | -2.477848 |
| C | -1.219486 | -0.186723 | 1.419230  |
| C | -0.746534 | 0.365123  | 2.770018  |
| O | -2.415964 | -2.065420 | 2.467358  |
| H | -0.010466 | 1.853935  | -1.081794 |
| H | 0.705516  | -3.378002 | 1.512312  |
| H | 5.368733  | -0.886042 | -1.504628 |
| H | 3.701143  | -3.394741 | 0.168186  |
| H | 3.476108  | 1.784842  | -1.697660 |
| H | 0.584910  | 2.445334  | 1.849578  |
| H | 1.422322  | 3.071735  | 0.446683  |
| H | -1.508233 | 3.617557  | 1.124937  |
| H | -0.709874 | 5.891325  | 1.707059  |
| H | 0.091319  | 4.677413  | 2.717822  |
| H | 0.960206  | 5.414912  | 1.362815  |
| H | -1.362988 | 5.368509  | -0.661645 |
| H | -1.173519 | 3.753580  | -1.346427 |
| H | 0.246958  | 4.780395  | -1.108265 |
| H | -2.169347 | 1.008675  | -1.697074 |
| H | -1.070312 | -0.335820 | -1.546375 |
| H | -4.134113 | -1.957543 | 0.513200  |
| H | -3.192337 | -0.238174 | 2.240226  |
| H | -3.060554 | -1.170665 | -2.915576 |
| H | -4.983253 | -2.678637 | -3.026758 |
| H | -3.863277 | -3.271941 | -1.787354 |
| H | -5.356171 | -2.438393 | -1.319802 |
| H | -5.258995 | -0.176701 | -3.444456 |
| H | -4.286183 | 0.998552  | -2.552293 |
| H | -5.575381 | 0.111159  | -1.723132 |
| H | -1.314507 | 1.261343  | 3.038558  |
| H | -0.907731 | -0.393657 | 3.539399  |
| H | 0.313744  | 0.621190  | 2.755661  |
| H | -1.886324 | -2.709297 | 1.975815  |

**Conformer 5:**

|   |           |           |           |
|---|-----------|-----------|-----------|
| C | -2.705366 | -2.126729 | 0.151022  |
| C | -3.203999 | -0.912573 | 0.677210  |
| C | -2.379942 | 0.249506  | 0.594837  |
| C | -1.102014 | 0.243688  | -0.002371 |
| C | -0.639515 | -0.978359 | -0.497221 |
| C | -1.419099 | -2.178270 | -0.444211 |
| C | -0.245125 | 1.502325  | 0.017459  |
| C | 1.223278  | 1.113384  | -0.294786 |
| O | 0.590828  | -1.118584 | -1.037402 |
| H | 1.769054  | 2.008031  | -0.617384 |
| C | -0.946359 | -3.425118 | -0.994289 |
| C | -4.503237 | -0.837757 | 1.303143  |
| O | -4.964498 | 0.209541  | 1.794088  |
| O | -3.463643 | -3.219394 | 0.219648  |
| O | -2.815474 | 1.397361  | 1.116596  |
| O | -1.602903 | -4.483497 | -0.954151 |
| C | -0.813881 | 2.679732  | -0.837496 |
| C | -0.904695 | 4.025076  | -0.087743 |
| C | 0.474499  | 4.572435  | 0.314865  |
| C | -1.665751 | 5.056445  | -0.934686 |
| C | 1.894077  | 0.568424  | 0.985571  |
| C | 3.223442  | -0.123067 | 0.783863  |
| C | 3.589714  | -0.532883 | -0.438299 |
| C | 2.771227  | -0.353049 | -1.689089 |



|   |           |           |           |
|---|-----------|-----------|-----------|
| C | 4.075062  | -0.315452 | 2.032482  |
| C | 3.377404  | -1.250209 | 3.046756  |
| C | 5.505067  | -0.801802 | 1.761752  |
| C | 1.306347  | 0.094795  | -1.448566 |
| C | 0.701976  | 0.545547  | -2.783722 |
| O | 2.829562  | -1.518995 | -2.514712 |
| H | -0.260459 | 1.852804  | 1.058091  |
| H | 0.041032  | -3.426547 | -1.475622 |
| H | -5.097735 | -1.761308 | 1.338842  |
| H | -2.939081 | -3.964978 | -0.204514 |
| H | -3.728309 | 1.221272  | 1.498631  |
| H | -0.199678 | 2.826514  | -1.733150 |
| H | -1.816031 | 2.418324  | -1.192848 |
| H | -1.484105 | 3.848098  | 0.828748  |
| H | 0.374598  | 5.517500  | 0.860136  |
| H | 1.023231  | 3.880750  | 0.963626  |
| H | 1.093876  | 4.765762  | -0.570903 |
| H | -1.767077 | 6.008140  | -0.401116 |
| H | -2.672552 | 4.702766  | -1.183022 |
| H | -1.139593 | 5.259337  | -1.876573 |
| H | 2.023398  | 1.406411  | 1.684139  |
| H | 1.203190  | -0.121387 | 1.489057  |
| H | 4.546575  | -1.018989 | -0.606422 |
| H | 3.233901  | 0.426666  | -2.308757 |
| H | 4.149699  | 0.675237  | 2.508971  |
| H | 3.977118  | -1.336931 | 3.959148  |
| H | 2.387921  | -0.884384 | 3.336716  |
| H | 3.257203  | -2.254469 | 2.624081  |
| H | 6.072265  | -0.831662 | 2.697817  |
| H | 6.035213  | -0.140540 | 1.068827  |
| H | 5.513714  | -1.813876 | 1.341077  |
| H | 1.157813  | 1.484622  | -3.111864 |
| H | 0.906319  | -0.217975 | -3.538078 |
| H | -0.377256 | 0.694070  | -2.717776 |
| H | 2.446112  | -2.251252 | -2.011289 |

**Conformer 6:**

|   |           |           |           |
|---|-----------|-----------|-----------|
| C | 2.933578  | -1.906922 | -0.317132 |
| C | 3.308456  | -0.624363 | -0.779848 |
| C | 2.380599  | 0.448634  | -0.624704 |
| C | 1.118076  | 0.289877  | -0.015983 |
| C | 0.779173  | -0.995472 | 0.414282  |
| C | 1.666631  | -2.112009 | 0.286369  |
| C | 0.147583  | 1.461644  | 0.043914  |
| C | -1.273718 | 0.920547  | 0.347685  |
| O | -0.423915 | -1.280300 | 0.958434  |
| H | -1.893196 | 1.741351  | 0.728395  |
| C | 1.320575  | -3.426216 | 0.769759  |
| C | 4.585510  | -0.393235 | -1.413113 |
| O | 4.939263  | 0.718142  | -1.849502 |
| O | 3.789782  | -2.917825 | -0.453681 |
| O | 2.698925  | 1.659129  | -1.085986 |
| O | 2.072906  | -4.414085 | 0.665016  |
| C | 0.617073  | 2.637619  | 0.959206  |
| C | 0.571378  | 4.025392  | 0.286674  |
| C | -0.858253 | 4.462150  | -0.072852 |
| C | 1.243879  | 5.074830  | 1.184836  |
| C | -1.914467 | 0.393681  | -0.954924 |
| C | -3.154368 | -0.451872 | -0.784395 |
| C | -3.458272 | -0.975563 | 0.410316  |
| C | -2.657930 | -0.765674 | 1.668135  |
| C | -3.990581 | -0.660125 | -2.040703 |
| C | -4.861597 | -1.924457 | -2.022481 |
| C | -4.858250 | 0.584165  | -2.337231 |
| C | -1.245805 | -0.164791 | 1.442008  |
| C | -0.669929 | 0.267850  | 2.795550  |
| O | -2.592777 | -1.965625 | 2.442681  |
| H | 0.114888  | 1.869629  | -0.975129 |
| H | 0.344131  | -3.547512 | 1.258121  |
| H | 5.263381  | -1.253172 | -1.506098 |
| H | 3.343681  | -3.731555 | -0.066819 |

|   |           |           |           |
|---|-----------|-----------|-----------|
| H | 3.618306  | 1.590758  | -1.486320 |
| H | 0.005289  | 2.675849  | 1.867590  |
| H | 1.644339  | 2.451749  | 1.289475  |
| H | 1.152348  | 3.955420  | -0.643151 |
| H | -0.854538 | 5.441543  | -0.563998 |
| H | -1.348269 | 3.759384  | -0.755811 |
| H | -1.481286 | 4.546210  | 0.827350  |
| H | 1.249163  | 6.060066  | 0.705285  |
| H | 2.282385  | 4.803862  | 1.405013  |
| H | 0.713316  | 5.174716  | 2.140703  |
| H | -2.138358 | 1.257299  | -1.594141 |
| H | -1.175702 | -0.194324 | -1.519673 |
| H | -4.342256 | -1.593248 | 0.546290  |
| H | -3.191194 | -0.062962 | 2.322208  |
| H | -3.277703 | -0.763278 | -2.873526 |
| H | -5.348846 | -2.058988 | -2.993962 |
| H | -4.267454 | -2.819719 | -1.813213 |
| H | -5.654039 | -1.859085 | -1.268471 |
| H | -5.374073 | 0.473026  | -3.297331 |
| H | -4.263043 | 1.501697  | -2.385767 |
| H | -5.616485 | 0.715440  | -1.557045 |
| H | -1.208821 | 1.139627  | 3.178930  |
| H | -0.790723 | -0.551599 | 3.507935  |
| H | 0.389267  | 0.522547  | 2.729361  |
| H | -2.144034 | -2.634351 | 1.905904  |

**Conformer 9:**

|   |           |           |           |
|---|-----------|-----------|-----------|
| C | -3.196868 | -1.379048 | 0.210966  |
| C | -3.328169 | -0.068955 | 0.725870  |
| C | -2.218886 | 0.821160  | 0.605791  |
| C | -1.008513 | 0.461024  | -0.026673 |
| C | -0.907531 | -0.854478 | -0.490016 |
| C | -1.986535 | -1.791947 | -0.401088 |
| C | 0.162985  | 1.435173  | -0.056847 |
| C | 1.463805  | 0.649388  | -0.371461 |
| O | 0.229693  | -1.349739 | -1.025954 |
| H | 2.227862  | 1.344015  | -0.739734 |
| C | -1.886020 | -3.129529 | -0.931980 |
| C | -4.538947 | 0.363757  | 1.383456  |
| O | -4.680960 | 1.499094  | 1.874885  |
| O | -4.225933 | -2.218391 | 0.311058  |
| O | -2.308186 | 2.043340  | 1.132037  |
| O | -2.808388 | -3.964571 | -0.861976 |
| C | -0.085243 | 2.692500  | -0.935187 |
| C | 0.888692  | 3.868643  | -0.694501 |
| C | 0.713643  | 4.924451  | -1.798835 |
| C | 0.710810  | 4.513450  | 0.690300  |
| C | 1.986347  | 0.009568  | 0.936550  |
| C | 3.057984  | -1.040521 | 0.769236  |
| C | 3.274796  | -1.602380 | -0.427299 |
| C | 2.536038  | -1.254876 | -1.690347 |
| C | 3.867607  | -1.450591 | 1.991194  |
| C | 4.808912  | -0.324707 | 2.467716  |
| C | 2.973958  | -1.942214 | 3.147221  |
| C | 1.254101  | -0.404210 | -1.478383 |
| C | 0.801584  | 0.132339  | -2.842508 |
| O | 2.259415  | -2.424844 | -2.464085 |
| H | 0.264287  | 1.806177  | 0.970666  |
| H | -0.946794 | -3.411075 | -1.427006 |
| H | -5.363303 | -0.360321 | 1.444346  |
| H | -3.935212 | -3.086095 | -0.105467 |
| H | -3.223082 | 2.124682  | 1.540592  |
| H | -0.051174 | 2.423016  | -1.993510 |
| H | -1.101474 | 3.050674  | -0.739981 |
| H | 1.921359  | 3.494333  | -0.762068 |
| H | 1.405948  | 5.762134  | -1.659119 |
| H | 0.895390  | 4.500750  | -2.793171 |
| H | -0.305490 | 5.330921  | -1.790994 |
| H | 1.415622  | 5.341518  | 0.825210  |
| H | 0.877553  | 3.805615  | 1.508593  |
| H | -0.303730 | 4.913887  | 0.803591  |

|   |           |           |           |
|---|-----------|-----------|-----------|
| H | 2.352852  | 0.819241  | 1.579565  |
| H | 1.143741  | -0.433427 | 1.485752  |
| H | 4.047282  | -2.360225 | -0.549565 |
| H | 3.193548  | -0.662733 | -2.340930 |
| H | 4.499258  | -2.292928 | 1.680352  |
| H | 5.435732  | -0.678816 | 3.293592  |
| H | 5.468952  | 0.008794  | 1.660271  |
| H | 4.251074  | 0.545377  | 2.832248  |
| H | 3.591274  | -2.319883 | 3.969523  |
| H | 2.311486  | -2.751753 | 2.822881  |
| H | 2.351758  | -1.134868 | 3.549748  |
| H | 1.458265  | 0.942916  | -3.173352 |
| H | 0.853920  | -0.677414 | -3.574230 |
| H | -0.222455 | 0.507934  | -2.815015 |
| H | 1.693107  | -2.999556 | -1.929570 |

**Conformer 11:**

|   |           |           |           |
|---|-----------|-----------|-----------|
| C | -2.867877 | -1.946610 | 0.082732  |
| C | -3.280525 | -0.721315 | 0.654664  |
| C | -2.380096 | 0.385242  | 0.610309  |
| C | -1.108991 | 0.318596  | -0.001692 |
| C | -0.725857 | -0.920979 | -0.523342 |
| C | -1.586137 | -2.065871 | -0.511309 |
| C | -0.166912 | 1.515255  | 0.050238  |
| C | 1.274824  | 1.035628  | -0.265165 |
| O | 0.500350  | -1.139829 | -1.047265 |
| H | 1.883116  | 1.892865  | -0.576839 |
| C | -1.197504 | -3.323376 | -1.101830 |
| C | -4.567618 | -0.584830 | 1.295178  |
| O | -4.953255 | 0.468898  | 1.835279  |
| O | -3.700272 | -2.985728 | 0.112031  |
| O | -2.733730 | 1.532666  | 1.190781  |
| O | -1.925783 | -4.334610 | -1.099047 |
| C | -0.654452 | 2.739597  | -0.772884 |
| C | 0.039554  | 4.078701  | -0.433596 |
| C | -0.312817 | 5.133280  | -1.495847 |
| C | -0.321652 | 4.595664  | 0.969074  |
| C | 1.895687  | 0.444816  | 1.021649  |
| C | 3.176544  | -0.336150 | 0.838307  |
| C | 3.531658  | -0.767486 | -0.379382 |
| C | 2.746455  | -0.526944 | -1.640510 |
| C | 3.993030  | -0.590860 | 2.099188  |
| C | 3.218172  | -1.481875 | 3.096694  |
| C | 5.391468  | -1.170488 | 1.848005  |
| C | 1.310431  | 0.021366  | -1.426246 |
| C | 0.778880  | 0.520610  | -2.775954 |
| O | 2.737999  | -1.691815 | -2.469913 |
| H | -0.164143 | 1.843154  | 1.097268  |
| H | -0.210820 | -3.376801 | -1.581457 |
| H | -5.223517 | -1.466493 | 1.296981  |
| H | -3.226368 | -3.750994 | -0.335987 |
| H | -3.653341 | 1.400127  | 1.574925  |
| H | -0.532802 | 2.544765  | -1.841095 |
| H | -1.728917 | 2.862918  | -0.601446 |
| H | 1.129699  | 3.932086  | -0.468514 |
| H | 0.180129  | 6.088672  | -1.284261 |
| H | -0.007294 | 4.812429  | -2.498344 |
| H | -1.394506 | 5.315842  | -1.519625 |
| H | 0.191137  | 5.541399  | 1.177143  |
| H | -0.044921 | 3.892165  | 1.760827  |
| H | -1.400662 | 4.773597  | 1.050010  |
| H | 2.073143  | 1.272590  | 1.721707  |
| H | 1.153339  | -0.195937 | 1.516983  |
| H | 4.454904  | -1.318210 | -0.535831 |
| H | 3.271841  | 0.220797  | -2.249721 |
| H | 4.125994  | 0.390250  | 2.582695  |
| H | 3.796027  | -1.613333 | 4.017797  |
| H | 2.250937  | -1.051933 | 3.373344  |
| H | 3.037723  | -2.473560 | 2.665877  |
| H | 5.940568  | -1.242177 | 2.792554  |
| H | 5.975359  | -0.543183 | 1.166800  |

|   |           |           |           |
|---|-----------|-----------|-----------|
| H | 5.339256  | -2.179097 | 1.422201  |
| H | 1.257868  | 1.465273  | -3.051419 |
| H | 1.011192  | -0.222693 | -3.542414 |
| H | -0.301251 | 0.674105  | -2.758938 |
| H | 2.296260  | -2.397112 | -1.975829 |

**Conformer 12:**

|   |           |           |           |
|---|-----------|-----------|-----------|
| C | -3.075983 | -1.721740 | 0.250490  |
| C | -3.364294 | -0.437619 | 0.766809  |
| C | -2.369552 | 0.579281  | 0.650112  |
| C | -1.123509 | 0.367752  | 0.019789  |
| C | -0.864382 | -0.925523 | -0.444707 |
| C | -1.823572 | -1.985722 | -0.359198 |
| C | -0.077694 | 1.475666  | -0.007935 |
| C | 1.309195  | 0.851429  | -0.316686 |
| O | 0.324995  | -1.280668 | -0.978201 |
| H | 1.985567  | 1.632637  | -0.682805 |
| C | -1.562411 | -3.300838 | -0.891303 |
| C | -4.619328 | -0.153808 | 1.422332  |
| O | -4.896852 | 0.955779  | 1.914921  |
| O | -3.997386 | -2.678399 | 0.347166  |
| O | -2.606166 | 1.781165  | 1.177478  |
| O | -2.378281 | -4.240479 | -0.824546 |
| C | -0.474931 | 2.692179  | -0.889154 |
| C | 0.360800  | 3.973380  | -0.666388 |
| C | 0.040582  | 5.000836  | -1.764913 |
| C | 0.138910  | 4.594017  | 0.723131  |
| C | 1.900560  | 0.279028  | 0.991753  |
| C | 3.081206  | -0.649390 | 0.838503  |
| C | 3.369431  | -1.186921 | -0.353579 |
| C | 2.608657  | -0.913792 | -1.623004 |
| C | 3.877086  | -0.921943 | 2.108557  |
| C | 4.654190  | -2.246171 | 2.099452  |
| C | 4.826841  | 0.255234  | 2.426638  |
| C | 1.233904  | -0.220215 | -1.423128 |
| C | 0.732086  | 0.259954  | -2.790907 |
| O | 2.478869  | -2.101246 | -2.408803 |
| H | -0.025326 | 1.857790  | 1.019140  |
| H | -0.595117 | -3.467186 | -1.384354 |
| H | -5.351434 | -0.971213 | 1.480638  |
| H | -3.604088 | -3.504506 | -0.069745 |
| H | -3.525194 | 1.751291  | 1.584231  |
| H | -0.423356 | 2.422217  | -1.946693 |
| H | -1.522932 | 2.933525  | -0.682774 |
| H | 1.428293  | 3.722018  | -0.756876 |
| H | 0.634828  | 5.912787  | -1.639487 |
| H | 0.247621  | 4.599743  | -2.763673 |
| H | -1.018145 | 5.287244  | -1.733764 |
| H | 0.742047  | 5.500963  | 0.842825  |
| H | 0.408632  | 3.912499  | 1.536290  |
| H | -0.913470 | 4.870008  | 0.860565  |
| H | 2.174422  | 1.125305  | 1.634591  |
| H | 1.116605  | -0.257546 | 1.546971  |
| H | 4.210325  | -1.864246 | -0.478452 |
| H | 3.200403  | -0.243767 | -2.261120 |
| H | 3.143657  | -0.976195 | 2.928021  |
| H | 5.112731  | -2.419595 | 3.078711  |
| H | 4.000250  | -3.094878 | 1.875020  |
| H | 5.462727  | -2.235837 | 1.359922  |
| H | 5.315127  | 0.104141  | 3.395631  |
| H | 4.298607  | 1.213258  | 2.468125  |
| H | 5.607159  | 0.333718  | 1.661256  |
| H | 1.288497  | 1.144968  | -3.114818 |
| H | 0.888227  | -0.535721 | -3.523195 |
| H | -0.330072 | 0.508725  | -2.771713 |
| H | 1.975226  | -2.741805 | -1.886559 |

**Conformer 24:**

|   |          |           |          |
|---|----------|-----------|----------|
| C | 3.242362 | 1.277666  | 0.165406 |
| C | 3.332058 | -0.005239 | 0.752582 |
| C | 2.198031 | -0.868442 | 0.673026 |

|   |           |           |           |
|---|-----------|-----------|-----------|
| C | 1.002005  | -0.507620 | 0.014481  |
| C | 0.941411  | 0.783329  | -0.520309 |
| C | 2.047912  | 1.691813  | -0.476319 |
| C | -0.195448 | -1.450208 | 0.016002  |
| C | -1.472128 | -0.634102 | -0.316711 |
| O | -0.178231 | 1.284555  | -1.086841 |
| H | -2.269183 | -1.314343 | -0.636800 |
| C | 1.989911  | 3.000806  | -1.079814 |
| C | 4.525924  | -0.436412 | 1.441152  |
| O | 4.631655  | -1.547045 | 1.994523  |
| O | 4.295499  | 2.090516  | 0.226050  |
| O | 2.250323  | -2.062792 | 1.264435  |
| O | 2.936552  | 3.810760  | -1.049742 |
| C | 0.043067  | -2.737532 | -0.821338 |
| C | -1.069759 | -3.807542 | -0.767720 |
| C | -0.698579 | -4.980442 | -1.690814 |
| C | -1.344524 | -4.314239 | 0.657722  |
| C | -1.946610 | 0.087300  | 0.967451  |
| C | -2.981008 | 1.168368  | 0.765496  |
| C | -3.199175 | 1.678404  | -0.453842 |
| C | -2.497367 | 1.241087  | -1.710074 |
| C | -3.751242 | 1.669650  | 1.978872  |
| C | -4.726050 | 0.606601  | 2.526981  |
| C | -2.817954 | 2.182514  | 3.093619  |
| C | -1.243455 | 0.355660  | -1.476138 |
| C | -0.834871 | -0.266747 | -2.817342 |
| O | -2.193347 | 2.359627  | -2.546993 |
| H | -0.306782 | -1.790303 | 1.053104  |
| H | 1.061916  | 3.282612  | -1.595426 |
| H | 5.370951  | 0.265505  | 1.468574  |
| H | 4.032865  | 2.942287  | -0.239231 |
| H | 3.160678  | -2.147349 | 1.683090  |
| H | 0.228232  | -2.481798 | -1.867833 |
| H | 0.966753  | -3.195241 | -0.451154 |
| H | -2.002547 | -3.373509 | -1.157018 |
| H | -1.492018 | -5.735826 | -1.708213 |
| H | -0.532772 | -4.643974 | -2.720622 |
| H | 0.221171  | -5.470847 | -1.348476 |
| H | -2.097979 | -5.109693 | 0.647718  |
| H | -1.714671 | -3.523856 | 1.319016  |
| H | -0.431800 | -4.723435 | 1.108062  |
| H | -2.332654 | -0.675664 | 1.654656  |
| H | -1.079092 | 0.523538  | 1.481947  |
| H | -3.944687 | 2.458556  | -0.600657 |
| H | -3.187436 | 0.641325  | -2.318705 |
| H | -4.355836 | 2.519729  | 1.636857  |
| H | -5.322869 | 1.025350  | 3.344796  |
| H | -5.413763 | 0.260127  | 1.748609  |
| H | -4.195371 | -0.265863 | 2.924847  |
| H | -3.404874 | 2.624836  | 3.905884  |
| H | -2.130854 | 2.948083  | 2.717820  |
| H | -2.220027 | 1.372340  | 3.526124  |
| H | -1.507693 | -1.089182 | -3.079723 |
| H | -0.897348 | 0.496998  | -3.596200 |
| H | 0.185642  | -0.651326 | -2.793494 |
| H | -1.594625 | 2.937919  | -2.053223 |

**Table S18.** Eucalyprobusal C (**1b**) DFT-geometry optimized conformers calculated at the B3LYP/6-31+G(d,p) level of theory.

**Conformer 1:**

|   |           |           |           |
|---|-----------|-----------|-----------|
| C | 2.527701  | -1.520565 | 0.712922  |
| C | 2.592805  | -0.890136 | -0.550000 |
| C | 1.569342  | 0.040946  | -0.902528 |
| C | 0.496221  | 0.370406  | -0.037709 |
| C | 0.436131  | -0.328387 | 1.169842  |
| C | 1.438633  | -1.258524 | 1.581108  |
| C | -0.450141 | 1.506461  | -0.416021 |

|   |           |           |           |
|---|-----------|-----------|-----------|
| C | -1.978667 | 1.195416  | -0.321574 |
| C | -2.592575 | 0.926925  | 1.078247  |
| O | -0.576679 | -0.144162 | 2.061504  |
| C | -0.017117 | 2.833655  | 0.272895  |
| C | 1.229317  | 3.523644  | -0.324814 |
| C | 0.970017  | 4.096145  | -1.727380 |
| C | 1.714957  | 4.632506  | 0.623378  |
| C | -2.340571 | 0.019049  | -1.266182 |
| C | -2.239114 | -1.361612 | -0.645578 |
| C | -2.098203 | -1.517492 | 0.684262  |
| C | -1.976337 | -0.364976 | 1.641181  |
| C | -2.338775 | -2.573223 | -1.562147 |
| C | -3.637867 | -2.577363 | -2.392666 |
| C | -1.104511 | -2.707014 | -2.478458 |
| H | -2.481302 | 2.090862  | -0.707236 |
| C | 1.361489  | -1.953638 | 2.846120  |
| O | 2.224462  | -2.766465 | 3.229833  |
| O | 3.486661  | -2.377351 | 1.061679  |
| C | 3.672401  | -1.171737 | -1.469909 |
| O | 3.767612  | -0.647442 | -2.594557 |
| O | 1.628360  | 0.634746  | -2.097193 |
| C | -2.510352 | 2.075467  | 2.083048  |
| O | -4.013845 | 0.711550  | 0.940527  |
| H | -0.299455 | 1.662119  | -1.486934 |
| H | -0.852703 | 3.545105  | 0.224343  |
| H | 0.172393  | 2.648135  | 1.334449  |
| H | 2.034409  | 2.780919  | -0.404851 |
| H | 1.873285  | 4.571798  | -2.125223 |
| H | 0.669915  | 3.323861  | -2.441713 |
| H | 0.180539  | 4.858371  | -1.694840 |
| H | 2.607756  | 5.128317  | 0.226467  |
| H | 1.964802  | 4.233376  | 1.613035  |
| H | 0.942128  | 5.400295  | 0.758231  |
| H | -1.706022 | 0.063364  | -2.159128 |
| H | -3.363824 | 0.155547  | -1.640004 |
| H | -2.040033 | -2.518106 | 1.108832  |
| H | -2.464370 | -0.601036 | 2.591085  |
| H | -2.359803 | -3.457723 | -0.912298 |
| H | -3.719132 | -3.511658 | -2.958116 |
| H | -4.524363 | -2.494577 | -1.754187 |
| H | -3.659855 | -1.754348 | -3.115292 |
| H | -1.170250 | -3.631387 | -3.062340 |
| H | -0.178125 | -2.739372 | -1.896867 |
| H | -1.030938 | -1.875351 | -3.187335 |
| H | 0.496310  | -1.740840 | 3.487941  |
| H | 3.244311  | -2.727093 | 1.972552  |
| H | 4.436698  | -1.888932 | -1.139725 |
| H | 2.447689  | 0.288181  | -2.564042 |
| H | -3.146847 | 1.828822  | 2.938061  |
| H | -1.497146 | 2.242680  | 2.442887  |
| H | -2.890484 | 2.998606  | 1.636706  |
| H | -4.166849 | -0.142668 | 0.512985  |

**Conformer 3:**

|   |           |           |           |
|---|-----------|-----------|-----------|
| C | 1.964315  | -2.220031 | 0.599979  |
| C | 2.244235  | -1.593323 | -0.635056 |
| C | 1.568321  | -0.376252 | -0.952414 |
| C | 0.637283  | 0.238153  | -0.078674 |
| C | 0.339845  | -0.454225 | 1.096934  |
| C | 0.995618  | -1.665542 | 1.473492  |
| C | 0.100617  | 1.627972  | -0.409306 |
| C | -1.450262 | 1.806075  | -0.340591 |
| C | -2.148413 | 1.682766  | 1.039548  |
| O | -0.584483 | 0.000680  | 1.987846  |
| C | 0.911177  | 2.721699  | 0.345687  |
| C | 2.324701  | 3.009487  | -0.207458 |
| C | 2.291055  | 3.694979  | -1.582658 |
| C | 3.112264  | 3.866537  | 0.797423  |
| C | -2.139659 | 0.839994  | -1.338151 |
| C | -2.476388 | -0.534806 | -0.786192 |
| C | -2.416965 | -0.782142 | 0.535706  |

|   |           |           |           |
|---|-----------|-----------|-----------|
| C | -1.974252 | 0.241559  | 1.544482  |
| C | -2.899759 | -1.578627 | -1.812644 |
| C | -2.967790 | -3.015264 | -1.276627 |
| C | -4.239329 | -1.196957 | -2.483958 |
| H | -1.640998 | 2.828709  | -0.688556 |
| C | 0.683608  | -2.350170 | 2.707648  |
| O | 1.243434  | -3.405861 | 3.060939  |
| O | 2.602738  | -3.345811 | 0.916866  |
| C | 3.196522  | -2.162748 | -1.562171 |
| O | 3.468652  | -1.651682 | -2.663806 |
| O | 1.829811  | 0.215273  | -2.120881 |
| C | -1.738274 | 2.706402  | 2.097463  |
| O | -3.563544 | 1.923450  | 0.880470  |
| H | 0.315122  | 1.774912  | -1.470529 |
| H | 0.341998  | 3.661037  | 0.323497  |
| H | 1.008068  | 2.441198  | 1.398843  |
| H | 2.857308  | 2.055192  | -0.316794 |
| H | 3.307032  | 3.879183  | -1.949081 |
| H | 1.780543  | 3.088277  | -2.336319 |
| H | 1.780210  | 4.664721  | -1.519728 |
| H | 4.124633  | 4.072444  | 0.432524  |
| H | 3.200886  | 3.366477  | 1.768622  |
| H | 2.617132  | 4.832151  | 0.962885  |
| H | -1.505338 | 0.716186  | -2.225374 |
| H | -3.060623 | 1.305785  | -1.711448 |
| H | -2.654942 | -1.767178 | 0.925590  |
| H | -2.533508 | 0.127203  | 2.477479  |
| H | -2.129582 | -1.556115 | -2.598843 |
| H | -3.178777 | -3.707800 | -2.097709 |
| H | -2.024909 | -3.322497 | -0.813546 |
| H | -3.767563 | -3.134003 | -0.536541 |
| H | -4.497681 | -1.930153 | -3.255041 |
| H | -4.200285 | -0.214965 | -2.963977 |
| H | -5.050908 | -1.185543 | -1.746763 |
| H | -0.083010 | -1.902710 | 3.354128  |
| H | 2.247692  | -3.637289 | 1.811031  |
| H | 3.693261  | -3.095077 | -1.259542 |
| H | 2.508069  | -0.351306 | -2.598655 |
| H | -2.437434 | 2.632314  | 2.935721  |
| H | -0.730398 | 2.538190  | 2.471503  |
| H | -1.806655 | 3.719659  | 1.691712  |
| H | -3.963043 | 1.179380  | 0.408651  |

#### Conformer 4:

|   |           |           |           |
|---|-----------|-----------|-----------|
| C | -3.169303 | -0.536619 | 0.536231  |
| C | -2.715044 | -1.160629 | -0.647147 |
| C | -1.311591 | -1.200030 | -0.899809 |
| C | -0.346785 | -0.641235 | -0.021598 |
| C | -0.844377 | -0.007019 | 1.118574  |
| C | -2.240013 | 0.055950  | 1.425975  |
| C | 1.126519  | -0.907044 | -0.326641 |
| C | 2.120907  | 0.280246  | -0.142197 |
| C | 2.288726  | 0.901828  | 1.269098  |
| O | -0.040700 | 0.564393  | 2.056266  |
| C | 1.528235  | -2.270261 | 0.310522  |
| C | 2.916838  | -2.838104 | -0.054256 |
| C | 3.148577  | -4.155924 | 0.703966  |
| C | 3.089770  | -3.051346 | -1.567033 |
| C | 1.786991  | 1.408941  | -1.154851 |
| C | 0.783504  | 2.436506  | -0.669486 |
| C | 0.442768  | 2.511638  | 0.630127  |
| C | 0.965775  | 1.570157  | 1.677514  |
| C | 0.196483  | 3.407640  | -1.684185 |
| C | 1.283366  | 4.195382  | -2.442613 |
| C | -0.756121 | 2.701415  | -2.671660 |
| H | 3.106680  | -0.109400 | -0.418066 |
| C | -2.729002 | 0.722958  | 2.611288  |
| O | -3.938486 | 0.791010  | 2.904617  |
| O | -4.476462 | -0.501746 | 0.791167  |
| C | -3.642776 | -1.761187 | -1.579266 |
| O | -3.287998 | -2.326369 | -2.629882 |

|   |           |           |           |
|---|-----------|-----------|-----------|
| O | -0.877770 | -1.807806 | -2.006654 |
| C | 2.797210  | -0.038968 | 2.360280  |
| O | 3.301056  | 1.930482  | 1.216959  |
| H | 1.154353  | -1.087328 | -1.404102 |
| H | 1.433483  | -2.223050 | 1.399327  |
| H | 0.777104  | -2.999700 | -0.021022 |
| H | 3.689614  | -2.131973 | 0.278163  |
| H | 4.143710  | -4.562877 | 0.492785  |
| H | 3.066799  | -4.014865 | 1.787688  |
| H | 2.410092  | -4.912065 | 0.409129  |
| H | 4.065712  | -3.498609 | -1.785960 |
| H | 3.026213  | -2.115007 | -2.131333 |
| H | 2.317172  | -3.725638 | -1.956679 |
| H | 1.427371  | 0.961963  | -2.088907 |
| H | 2.711388  | 1.933121  | -1.431827 |
| H | -0.269505 | 3.265337  | 0.961222  |
| H | 1.123176  | 2.098532  | 2.622384  |
| H | -0.401325 | 4.132480  | -1.116469 |
| H | 0.819982  | 4.950058  | -3.086806 |
| H | 1.959867  | 4.713138  | -1.753653 |
| H | 1.884638  | 3.541890  | -3.084153 |
| H | -1.224089 | 3.438624  | -3.332942 |
| H | -1.551615 | 2.166358  | -2.143998 |
| H | -0.226101 | 1.982128  | -3.305293 |
| H | -1.986480 | 1.185324  | 3.274714  |
| H | -4.587557 | -0.007394 | 1.660078  |
| H | -4.711104 | -1.704565 | -1.328316 |
| H | -1.685889 | -2.143388 | -2.500900 |
| H | 3.044039  | 0.557493  | 3.243677  |
| H | 2.054471  | -0.782521 | 2.644502  |
| H | 3.708673  | -0.545239 | 2.031705  |
| H | 2.958067  | 2.691675  | 0.728284  |

**Conformer 5:**

|   |           |           |           |
|---|-----------|-----------|-----------|
| C | 2.409167  | -1.568180 | 0.763339  |
| C | 2.489442  | -1.054260 | -0.550860 |
| C | 1.521190  | -0.092196 | -0.968537 |
| C | 0.486630  | 0.377417  | -0.121108 |
| C | 0.403571  | -0.212340 | 1.141208  |
| C | 1.355785  | -1.162732 | 1.620084  |
| C | -0.411304 | 1.515822  | -0.595096 |
| C | -1.949853 | 1.262852  | -0.466484 |
| C | -2.567864 | 1.153537  | 0.953126  |
| O | -0.585757 | 0.106589  | 2.022010  |
| C | 0.044937  | 2.908772  | -0.065710 |
| C | 1.326803  | 3.504509  | -0.707301 |
| C | 1.215741  | 5.037643  | -0.780985 |
| C | 2.610188  | 3.116518  | 0.047212  |
| C | -2.353537 | 0.011893  | -1.291900 |
| C | -2.313919 | -1.304169 | -0.538090 |
| C | -2.177138 | -1.335196 | 0.800917  |
| C | -1.998577 | -0.100091 | 1.638328  |
| C | -2.471881 | -2.594088 | -1.331522 |
| C | -3.770949 | -2.619312 | -2.161701 |
| C | -1.246765 | -2.875370 | -2.226449 |
| H | -2.427118 | 2.131017  | -0.937273 |
| C | 1.260244  | -1.738414 | 2.942533  |
| O | 2.077756  | -2.568576 | 3.384222  |
| O | 3.319106  | -2.451376 | 1.171978  |
| C | 3.533227  | -1.480421 | -1.456643 |
| O | 3.641276  | -1.059052 | -2.622498 |
| O | 1.601217  | 0.399892  | -2.207070 |
| C | -2.438176 | 2.388065  | 1.844788  |
| O | -3.996793 | 0.980829  | 0.835090  |
| H | -0.262315 | 1.566812  | -1.677766 |
| H | -0.783292 | 3.601119  | -0.260288 |
| H | 0.178624  | 2.887700  | 1.020420  |
| H | 1.406962  | 3.125827  | -1.734936 |
| H | 2.117187  | 5.478430  | -1.221443 |
| H | 0.358465  | 5.349029  | -1.388699 |
| H | 1.090701  | 5.470652  | 0.219933  |



|   |           |           |           |
|---|-----------|-----------|-----------|
| H | 3.495111  | 3.523853  | -0.454506 |
| H | 2.742064  | 2.034417  | 0.123498  |
| H | 2.591997  | 3.520213  | 1.067801  |
| H | -1.712700 | -0.058685 | -2.178657 |
| H | -3.368145 | 0.151800  | -1.687374 |
| H | -2.164877 | -2.290758 | 1.322011  |
| H | -2.484258 | -0.220846 | 2.610764  |
| H | -2.533426 | -3.408288 | -0.597785 |
| H | -3.897045 | -3.600245 | -2.631901 |
| H | -4.651647 | -2.431819 | -1.537524 |
| H | -3.754991 | -1.871993 | -2.962466 |
| H | -1.357507 | -3.848087 | -2.717622 |
| H | -0.322169 | -2.895257 | -1.641461 |
| H | -1.134621 | -2.121351 | -3.012895 |
| H | 0.423323  | -1.414582 | 3.575387  |
| H | 3.073595  | -2.704445 | 2.113546  |
| H | 4.256712  | -2.214841 | -1.076199 |
| H | 2.387863  | -0.037576 | -2.653411 |
| H | -3.094044 | 2.254579  | 2.710187  |
| H | -1.420961 | 2.536819  | 2.201769  |
| H | -2.766146 | 3.283181  | 1.309106  |
| H | -4.183546 | 0.095347  | 0.493046  |

**Conformer 6:**

|   |           |           |           |
|---|-----------|-----------|-----------|
| C | -2.882657 | -1.155089 | 0.713440  |
| C | -2.341809 | -1.796916 | -0.423013 |
| C | -0.973732 | -1.560989 | -0.750726 |
| C | -0.126729 | -0.712455 | 0.008616  |
| C | -0.713529 | -0.074052 | 1.103143  |
| C | -2.077801 | -0.278498 | 1.481744  |
| C | 1.358077  | -0.687411 | -0.350750 |
| C | 2.068806  | 0.701087  | -0.349894 |
| C | 2.143659  | 1.502000  | 0.976582  |
| O | -0.024449 | 0.759745  | 1.928548  |
| C | 2.072320  | -1.848790 | 0.401790  |
| C | 3.539532  | -2.140210 | 0.019658  |
| C | 4.082825  | -3.279773 | 0.898016  |
| C | 3.705973  | -2.484065 | -1.469594 |
| C | 1.450907  | 1.606804  | -1.447148 |
| C | 0.265530  | 2.446937  | -1.013349 |
| C | -0.035599 | 2.598855  | 0.288823  |
| C | 0.720768  | 1.910621  | 1.391028  |
| C | -0.512358 | 3.115324  | -2.139768 |
| C | -1.473774 | 2.107525  | -2.811010 |
| C | -1.273387 | 4.383896  | -1.727021 |
| H | 3.106103  | 0.507741  | -0.643856 |
| C | -2.662361 | 0.399048  | 2.616681  |
| O | -3.846733 | 0.238185  | 2.970299  |
| O | -4.156117 | -1.373842 | 1.038192  |
| C | -3.144866 | -2.684255 | -1.234019 |
| O | -2.709302 | -3.273980 | -2.239883 |
| O | -0.454775 | -2.180925 | -1.813485 |
| C | 2.885952  | 0.825191  | 2.127851  |
| O | 2.900199  | 2.712498  | 0.757281  |
| H | 1.389816  | -0.979936 | -1.403198 |
| H | 2.005251  | -1.698350 | 1.483272  |
| H | 1.490892  | -2.756687 | 0.192185  |
| H | 4.146635  | -1.249652 | 0.230835  |
| H | 5.136114  | -3.482444 | 0.674398  |
| H | 4.006933  | -3.035821 | 1.963747  |
| H | 3.521650  | -4.207086 | 0.727085  |
| H | 4.749133  | -2.731457 | -1.695560 |
| H | 3.418166  | -1.655245 | -2.124862 |
| H | 3.089850  | -3.350110 | -1.741209 |
| H | 1.161821  | 0.991637  | -2.307663 |
| H | 2.218605  | 2.289919  | -1.838559 |
| H | -0.871658 | 3.221347  | 0.594914  |
| H | 0.791267  | 2.561355  | 2.267505  |
| H | 0.230396  | 3.406596  | -2.898038 |
| H | -1.949385 | 2.562453  | -3.686418 |
| H | -0.958403 | 1.202163  | -3.145212 |

|   |           |           |           |
|---|-----------|-----------|-----------|
| H | -2.262999 | 1.808175  | -2.112837 |
| H | -1.713589 | 4.858977  | -2.609781 |
| H | -0.614934 | 5.112624  | -1.243069 |
| H | -2.094913 | 4.157639  | -1.038290 |
| H | -2.018522 | 1.083745  | 3.184017  |
| H | -4.344551 | -0.819278 | 1.855933  |
| H | -4.190357 | -2.831647 | -0.929605 |
| H | -1.185417 | -2.736773 | -2.222546 |
| H | 3.024171  | 1.557741  | 2.928676  |
| H | 2.337700  | -0.024781 | 2.530610  |
| H | 3.875351  | 0.495178  | 1.800445  |
| H | 2.379825  | 3.319835  | 0.212990  |

**Conformer 7:**

|   |           |           |           |
|---|-----------|-----------|-----------|
| C | 1.899435  | -2.032105 | 0.840755  |
| C | 2.230365  | -1.506086 | -0.428549 |
| C | 1.543872  | -0.341003 | -0.885132 |
| C | 0.551630  | 0.319113  | -0.117983 |
| C | 0.206535  | -0.278866 | 1.095111  |
| C | 0.872658  | -1.431924 | 1.611161  |
| C | -0.019548 | 1.644383  | -0.612899 |
| C | -1.580813 | 1.737163  | -0.648336 |
| C | -2.355986 | 1.721562  | 0.696325  |
| O | -0.778534 | 0.222002  | 1.891584  |
| C | 0.670767  | 2.882240  | 0.035105  |
| C | 2.110727  | 3.201086  | -0.449317 |
| C | 2.343067  | 4.722335  | -0.446903 |
| C | 3.194425  | 2.512844  | 0.398433  |
| C | -2.156881 | 0.633220  | -1.571872 |
| C | -2.491544 | -0.683078 | -0.894771 |
| C | -2.511802 | -0.788869 | 0.446801  |
| C | -2.152803 | 0.349982  | 1.361407  |
| C | -2.833208 | -1.834011 | -1.833065 |
| C | -1.549956 | -2.454019 | -2.432472 |
| C | -3.711341 | -2.928835 | -1.209175 |
| H | -1.804319 | 2.704236  | -1.115250 |
| C | 0.512705  | -2.015002 | 2.883850  |
| O | 1.078219  | -3.019697 | 3.356601  |
| O | 2.546702  | -3.107804 | 1.286923  |
| C | 3.247155  | -2.123719 | -1.250690 |
| O | 3.567990  | -1.699554 | -2.375757 |
| O | 1.859929  | 0.159819  | -2.081959 |
| C | -2.054394 | 2.864791  | 1.664781  |
| O | -3.766879 | 1.878108  | 0.431131  |
| H | 0.251624  | 1.696098  | -1.671545 |
| H | 0.037363  | 3.747291  | -0.196338 |
| H | 0.683088  | 2.794260  | 1.126083  |
| H | 2.212640  | 2.849440  | -1.484620 |
| H | 3.359231  | 4.967392  | -0.775944 |
| H | 1.641261  | 5.236450  | -1.113508 |
| H | 2.212172  | 5.137762  | 0.560696  |
| H | 4.193615  | 2.731428  | 0.005264  |
| H | 3.080055  | 1.426428  | 0.425157  |
| H | 3.158739  | 2.874808  | 1.434089  |
| H | -1.458979 | 0.447415  | -2.397188 |
| H | -3.072611 | 0.999826  | -2.057434 |
| H | -2.775170 | -1.728629 | 0.923608  |
| H | -2.753313 | 0.310855  | 2.274588  |
| H | -3.397815 | -1.392971 | -2.668631 |
| H | -1.809105 | -3.207053 | -3.184267 |
| H | -0.914321 | -1.706512 | -2.916110 |
| H | -0.960189 | -2.944802 | -1.650660 |
| H | -3.999771 | -3.656753 | -1.974440 |
| H | -4.626663 | -2.515823 | -0.772830 |
| H | -3.178423 | -3.478225 | -0.425157 |
| H | -0.297140 | -1.534614 | 3.448798  |
| H | 2.152069  | -3.330703 | 2.184397  |
| H | 3.749016  | -3.012113 | -0.842778 |
| H | 2.576848  | -0.426148 | -2.472379 |
| H | -2.811286 | 2.852214  | 2.454635  |
| H | -1.072881 | 2.770485  | 2.125199  |

|   |           |          |          |
|---|-----------|----------|----------|
| H | -2.120018 | 3.828052 | 1.151387 |
| H | -4.105539 | 1.069709 | 0.021601 |

**Conformer 8:**

|   |           |           |           |
|---|-----------|-----------|-----------|
| C | -3.108949 | -0.836356 | 0.467831  |
| C | -2.595489 | -1.451852 | -0.695564 |
| C | -1.190872 | -1.387107 | -0.936141 |
| C | -0.281727 | -0.732827 | -0.064623 |
| C | -0.838905 | -0.109688 | 1.053847  |
| C | -2.237981 | -0.149601 | 1.349010  |
| C | 1.211278  | -0.890857 | -0.348186 |
| C | 2.107587  | 0.375871  | -0.190725 |
| C | 2.210472  | 1.051458  | 1.201510  |
| O | -0.091253 | 0.550228  | 1.979824  |
| C | 1.711016  | -2.198930 | 0.333755  |
| C | 3.145146  | -2.664631 | 0.001872  |
| C | 3.470799  | -3.936404 | 0.802980  |
| C | 3.354886  | -2.908506 | -1.501582 |
| C | 1.696939  | 1.446131  | -1.236493 |
| C | 0.602008  | 2.401528  | -0.796677 |
| C | 0.239056  | 2.483323  | 0.496385  |
| C | 0.834135  | 1.622492  | 1.575797  |
| C | -0.019111 | 3.255876  | -1.894963 |
| C | -1.286716 | 4.014461  | -1.478604 |
| C | 1.013857  | 4.235494  | -2.498230 |
| H | 3.123708  | 0.056967  | -0.446619 |
| C | -2.789417 | 0.506450  | 2.512784  |
| O | -4.003296 | 0.486072  | 2.795156  |
| O | -4.417219 | -0.898533 | 0.711949  |
| C | -3.463841 | -2.145433 | -1.620154 |
| O | -3.055105 | -2.705967 | -2.653569 |
| O | -0.700116 | -1.986116 | -2.023877 |
| C | 2.781270  | 0.188489  | 2.325561  |
| O | 3.136876  | 2.156955  | 1.126053  |
| H | 1.265790  | -1.099777 | -1.419400 |
| H | 1.598088  | -2.127972 | 1.419599  |
| H | 1.024474  | -2.995064 | 0.015784  |
| H | 3.854731  | -1.889354 | 0.320856  |
| H | 4.497978  | -4.268506 | 0.615572  |
| H | 3.363343  | -3.769942 | 1.880843  |
| H | 2.798998  | -4.757739 | 0.523460  |
| H | 4.366097  | -3.282988 | -1.695672 |
| H | 3.225010  | -1.997533 | -2.095247 |
| H | 2.643563  | -3.653586 | -1.878789 |
| H | 1.379592  | 0.949879  | -2.162544 |
| H | 2.582390  | 2.030252  | -1.518941 |
| H | -0.545915 | 3.165218  | 0.809362  |
| H | 0.937848  | 2.192417  | 2.503861  |
| H | -0.302062 | 2.555666  | -2.696005 |
| H | -1.719413 | 4.519003  | -2.348403 |
| H | -2.047465 | 3.342828  | -1.068656 |
| H | -1.070024 | 4.784637  | -0.729344 |
| H | 0.563029  | 4.800604  | -3.320602 |
| H | 1.893310  | 3.721042  | -2.896035 |
| H | 1.351006  | 4.954633  | -1.742278 |
| H | -2.092004 | 1.042617  | 3.169596  |
| H | -4.575402 | -0.392865 | 1.566917  |
| H | -4.535835 | -2.166817 | -1.379683 |
| H | -1.474857 | -2.396057 | -2.515514 |
| H | 2.963153  | 0.827489  | 3.194869  |
| H | 2.101086  | -0.608487 | 2.621180  |
| H | 3.737540  | -0.245922 | 2.022372  |
| H | 2.740508  | 2.871963  | 0.608838  |

**Conformer 9:**

|   |          |           |           |
|---|----------|-----------|-----------|
| C | 2.582417 | -1.465829 | 0.690011  |
| C | 2.617759 | -0.819159 | -0.565564 |
| C | 1.561438 | 0.081643  | -0.900234 |
| C | 0.484042 | 0.365974  | -0.024938 |
| C | 0.455051 | -0.349186 | 1.174517  |
| C | 1.490821 | -1.250637 | 1.567600  |

|   |           |           |           |
|---|-----------|-----------|-----------|
| C | -0.496686 | 1.478688  | -0.387305 |
| C | -2.017935 | 1.146864  | -0.273722 |
| C | -2.593537 | 0.837493  | 1.127063  |
| O | -0.559418 | -0.213931 | 2.072850  |
| C | -0.081765 | 2.815143  | 0.297822  |
| C | 1.132675  | 3.542182  | -0.321379 |
| C | 0.829694  | 4.110825  | -1.716642 |
| C | 1.604678  | 4.661730  | 0.621142  |
| C | -2.406742 | -0.008785 | -1.230651 |
| C | -2.214337 | -1.400169 | -0.667356 |
| C | -2.033963 | -1.592246 | 0.649240  |
| C | -1.954798 | -0.469079 | 1.636387  |
| C | -2.287666 | -2.582193 | -1.622458 |
| C | -3.615530 | -2.614514 | -2.405697 |
| C | -1.083031 | -2.629578 | -2.585110 |
| H | -2.535716 | 2.047814  | -0.625570 |
| C | 1.442716  | -1.966012 | 2.822123  |
| O | 2.335056  | -2.753205 | 3.192733  |
| O | 3.572063  | -2.293836 | 1.023147  |
| C | 3.699278  | -1.054612 | -1.495633 |
| O | 3.770360  | -0.514255 | -2.614622 |
| O | 1.593864  | 0.691075  | -2.088034 |
| C | -2.490110 | 1.954240  | 2.169763  |
| O | -3.995890 | 0.585194  | 0.890012  |
| H | -0.366051 | 1.638242  | -1.460227 |
| H | -0.936092 | 3.505614  | 0.270575  |
| H | 0.136556  | 2.630589  | 1.354296  |
| H | 1.956637  | 2.823114  | -0.419600 |
| H | 1.711033  | 4.613392  | -2.130279 |
| H | 0.538358  | 3.331835  | -2.427139 |
| H | 0.019305  | 4.849885  | -1.666531 |
| H | 2.475078  | 5.184044  | 0.208766  |
| H | 1.885309  | 4.267043  | 1.604379  |
| H | 0.813127  | 5.406964  | 0.773544  |
| H | -1.845508 | 0.096334  | -2.166847 |
| H | -3.464706 | 0.097425  | -1.496500 |
| H | -1.919327 | -2.600099 | 1.044178  |
| H | -2.428750 | -0.755184 | 2.582168  |
| H | -2.247047 | -3.488954 | -1.004636 |
| H | -3.680703 | -3.533362 | -2.998493 |
| H | -4.477705 | -2.582961 | -1.731375 |
| H | -3.695815 | -1.769984 | -3.098990 |
| H | -1.132444 | -3.531379 | -3.205229 |
| H | -0.135853 | -2.647272 | -2.036960 |
| H | -1.066938 | -1.767218 | -3.260374 |
| H | 0.572062  | -1.793594 | 3.468618  |
| H | 3.346403  | -2.662962 | 1.930474  |
| H | 4.488479  | -1.750608 | -1.178920 |
| H | 2.419947  | 0.375513  | -2.564670 |
| H | -3.083571 | 1.678645  | 3.052136  |
| H | -1.470294 | 2.121262  | 2.511645  |
| H | -2.894486 | 2.888121  | 1.769540  |
| H | -4.456394 | 0.562689  | 1.739472  |

**Conformer 10:**

|   |           |           |           |
|---|-----------|-----------|-----------|
| C | 2.561797  | -1.491347 | 0.696285  |
| C | 2.610811  | -0.847329 | -0.560364 |
| C | 1.568150  | 0.067080  | -0.900605 |
| C | 0.491483  | 0.366370  | -0.029928 |
| C | 0.448022  | -0.345476 | 1.171170  |
| C | 1.470188  | -1.259558 | 1.569643  |
| C | -0.475573 | 1.488702  | -0.397135 |
| C | -2.000029 | 1.164277  | -0.285150 |
| C | -2.587986 | 0.861102  | 1.117013  |
| O | -0.566812 | -0.191897 | 2.065780  |
| C | -0.052890 | 2.820917  | 0.290462  |
| C | 1.173712  | 3.534905  | -0.319797 |
| C | 0.887493  | 4.105777  | -1.717680 |
| C | 1.650742  | 4.649835  | 0.625623  |
| C | -2.390132 | 0.007292  | -1.239599 |
| C | -2.223423 | -1.382833 | -0.663907 |

|   |           |           |           |
|---|-----------|-----------|-----------|
| C | -2.052124 | -1.569519 | 0.654491  |
| C | -1.963552 | -0.442936 | 1.636514  |
| C | -2.312840 | -2.570176 | -1.611401 |
| C | -3.641811 | -2.590669 | -2.393219 |
| C | -1.109669 | -2.641369 | -2.574287 |
| H | -2.505490 | 2.070414  | -0.648369 |
| C | 1.407973  | -1.971764 | 2.825680  |
| O | 2.288623  | -2.770031 | 3.200306  |
| O | 3.538771  | -2.332137 | 1.034502  |
| C | 3.692814  | -1.098466 | -1.485664 |
| O | 3.775774  | -0.560353 | -2.605002 |
| O | 1.613573  | 0.675057  | -2.088953 |
| C | -2.484635 | 1.979782  | 2.157554  |
| O | -3.989850 | 0.537187  | 0.961153  |
| H | -0.339080 | 1.647274  | -1.469503 |
| H | -0.899711 | 3.520731  | 0.256264  |
| H | 0.154908  | 2.634767  | 1.348726  |
| H | 1.990376  | 2.806733  | -0.411453 |
| H | 1.777290  | 4.598420  | -2.125030 |
| H | 0.593125  | 3.329441  | -2.429859 |
| H | 0.085004  | 4.853941  | -1.674130 |
| H | 2.529857  | 5.162385  | 0.219581  |
| H | 1.919577  | 4.252753  | 1.611148  |
| H | 0.866283  | 5.403846  | 0.771646  |
| H | -1.814994 | 0.097757  | -2.168848 |
| H | -3.442963 | 0.121618  | -1.522442 |
| H | -1.957307 | -2.576529 | 1.056233  |
| H | -2.447584 | -0.712235 | 2.579159  |
| H | -2.284526 | -3.472766 | -0.987003 |
| H | -3.720666 | -3.513737 | -2.977748 |
| H | -4.502399 | -2.541075 | -1.718002 |
| H | -3.710609 | -1.751586 | -3.094512 |
| H | -1.170808 | -3.547931 | -3.186370 |
| H | -0.162377 | -2.666219 | -2.026569 |
| H | -1.082982 | -1.785453 | -3.257460 |
| H | 0.537607  | -1.786493 | 3.468918  |
| H | 3.304650  | -2.696327 | 1.941922  |
| H | 4.471263  | -1.804661 | -1.164997 |
| H | 2.437353  | 0.347523  | -2.561706 |
| H | -3.087770 | 1.703497  | 3.029031  |
| H | -1.463751 | 2.149035  | 2.495116  |
| H | -2.872697 | 2.922550  | 1.753656  |
| H | -4.493303 | 1.362134  | 0.956106  |

**Conformer 11:**

|   |           |           |           |
|---|-----------|-----------|-----------|
| C | 1.925141  | -2.164593 | 0.633644  |
| C | 2.175933  | -1.620867 | -0.646526 |
| C | 1.514741  | -0.410989 | -1.016509 |
| C | 0.623121  | 0.273960  | -0.153661 |
| C | 0.348615  | -0.340501 | 1.069015  |
| C | 0.996929  | -1.537023 | 1.501300  |
| C | 0.078747  | 1.637916  | -0.565861 |
| C | -1.474724 | 1.801244  | -0.477330 |
| C | -2.145705 | 1.778510  | 0.921776  |
| O | -0.546850 | 0.183320  | 1.952429  |
| C | 0.874081  | 2.822255  | 0.061038  |
| C | 2.285088  | 3.092664  | -0.526800 |
| C | 2.590164  | 4.600665  | -0.492838 |
| C | 3.398148  | 2.325246  | 0.207373  |
| C | -2.171162 | 0.753601  | -1.384350 |
| C | -2.497872 | -0.573289 | -0.720485 |
| C | -2.413898 | -0.717606 | 0.615261  |
| C | -1.951134 | 0.381283  | 1.531614  |
| C | -2.942832 | -1.692285 | -1.654547 |
| C | -2.981859 | -3.086145 | -1.012821 |
| C | -4.305799 | -1.369596 | -2.309591 |
| H | -1.687235 | 2.791385  | -0.898802 |
| C | 0.714369  | -2.136568 | 2.785767  |
| O | 1.266138  | -3.179645 | 3.186035  |
| O | 2.552393  | -3.281829 | 0.999166  |
| C | 3.088597  | -2.264804 | -1.565084 |

|   |           |           |           |
|---|-----------|-----------|-----------|
| O | 3.336976  | -1.826359 | -2.702928 |
| O | 1.757526  | 0.108421  | -2.222313 |
| C | -1.722898 | 2.880369  | 1.892731  |
| O | -3.564967 | 1.999087  | 0.770684  |
| H | 0.270263  | 1.710500  | -1.640558 |
| H | 0.265951  | 3.721861  | -0.093893 |
| H | 0.967607  | 2.697747  | 1.144485  |
| H | 2.287699  | 2.775215  | -1.578111 |
| H | 3.587567  | 4.811139  | -0.895078 |
| H | 1.863187  | 5.170486  | -1.082770 |
| H | 2.560245  | 4.984158  | 0.535278  |
| H | 4.372746  | 2.515041  | -0.256195 |
| H | 3.235910  | 1.244626  | 0.204811  |
| H | 3.460227  | 2.648097  | 1.254658  |
| H | -1.546543 | 0.559876  | -2.265903 |
| H | -3.097972 | 1.184919  | -1.783811 |
| H | -2.645134 | -1.669123 | 1.084388  |
| H | -2.484350 | 0.336095  | 2.485467  |
| H | -2.197527 | -1.722890 | -2.463999 |
| H | -3.208522 | -3.838837 | -1.774673 |
| H | -2.023430 | -3.350606 | -0.555264 |
| H | -3.759714 | -3.156794 | -0.243807 |
| H | -4.579993 | -2.157443 | -3.018844 |
| H | -4.291052 | -0.423640 | -2.858485 |
| H | -5.094716 | -1.312465 | -1.550269 |
| H | -0.021080 | -1.633441 | 3.427480  |
| H | 2.222461  | -3.510131 | 1.920953  |
| H | 3.576109  | -3.187671 | -1.221389 |
| H | 2.408430  | -0.500700 | -2.685677 |
| H | -2.416153 | 2.875012  | 2.739097  |
| H | -0.713356 | 2.734442  | 2.271969  |
| H | -1.788161 | 3.859737  | 1.410690  |
| H | -3.967934 | 1.218757  | 0.364959  |

**Conformer 13:**

|   |           |           |           |
|---|-----------|-----------|-----------|
| C | -2.164504 | 1.861607  | 0.835451  |
| C | -2.448741 | 1.209853  | -0.385261 |
| C | -1.610966 | 0.127880  | -0.793288 |
| C | -0.515068 | -0.332471 | -0.022196 |
| C | -0.229941 | 0.387706  | 1.140184  |
| C | -1.040281 | 1.468816  | 1.603504  |
| C | 0.204761  | -1.612826 | -0.439648 |
| C | 1.764119  | -1.562954 | -0.493643 |
| C | 2.532343  | -1.336431 | 0.828365  |
| O | 0.834539  | 0.087743  | 1.934275  |
| C | -0.368922 | -2.837175 | 0.334653  |
| C | -1.754296 | -3.339842 | -0.128803 |
| C | -1.711173 | -3.980684 | -1.525012 |
| C | -2.316992 | -4.335511 | 0.899117  |
| C | 2.247983  | -0.512944 | -1.523445 |
| C | 2.373543  | 0.901563  | -0.999673 |
| C | 2.375397  | 1.149960  | 0.319480  |
| C | 2.198129  | 0.074894  | 1.348288  |
| C | 2.548077  | 1.980689  | -2.059601 |
| C | 1.193916  | 2.337736  | -2.713982 |
| C | 3.253037  | 3.252299  | -1.565350 |
| H | 2.071751  | -2.549271 | -0.862678 |
| C | -0.731128 | 2.186053  | 2.819161  |
| O | -1.424239 | 3.128016  | 3.250063  |
| O | -2.949722 | 2.860452  | 1.237680  |
| C | -3.563893 | 1.620818  | -1.208311 |
| O | -3.848806 | 1.083029  | -2.294102 |
| O | -1.876694 | -0.484546 | -1.950102 |
| C | 2.341021  | -2.394304 | 1.918965  |
| O | 3.923685  | -1.350995 | 0.440471  |
| H | -0.066225 | -1.766263 | -1.486911 |
| H | 0.338454  | -3.673365 | 0.246288  |
| H | -0.435242 | -2.595919 | 1.400114  |
| H | -2.440294 | -2.483457 | -0.169458 |
| H | -2.708365 | -4.319501 | -1.827079 |
| H | -1.361020 | -3.282426 | -2.290757 |

|   |           |           |           |
|---|-----------|-----------|-----------|
| H | -1.047938 | -4.855632 | -1.529678 |
| H | -3.306924 | -4.696140 | 0.598381  |
| H | -2.413809 | -3.877617 | 1.890202  |
| H | -1.661876 | -5.210858 | 0.997815  |
| H | 1.582378  | -0.527522 | -2.395304 |
| H | 3.238218  | -0.806129 | -1.894173 |
| H | 2.497058  | 2.161010  | 0.697502  |
| H | 2.813544  | 0.285904  | 2.230191  |
| H | 3.179278  | 1.537938  | -2.845193 |
| H | 1.345533  | 3.031303  | -3.548221 |
| H | 0.676567  | 1.456018  | -3.103870 |
| H | 0.533178  | 2.822062  | -1.986491 |
| H | 3.437488  | 3.929071  | -2.406313 |
| H | 4.214947  | 3.022838  | -1.095855 |
| H | 2.640558  | 3.798633  | -0.839095 |
| H | 0.159430  | 1.870773  | 3.378842  |
| H | -2.565831 | 3.198852  | 2.102847  |
| H | -4.178519 | 2.453194  | -0.838287 |
| H | -2.680476 | -0.033669 | -2.350259 |
| H | 3.065741  | -2.215667 | 2.724929  |
| H | 1.350427  | -2.364154 | 2.369139  |
| H | 2.524349  | -3.394233 | 1.516032  |
| H | 4.468991  | -1.393755 | 1.237314  |

**Conformer 14:**

|   |           |           |           |
|---|-----------|-----------|-----------|
| C | -2.077731 | 1.951414  | 0.838130  |
| C | -2.395756 | 1.315181  | -0.382603 |
| C | -1.610493 | 0.196029  | -0.794483 |
| C | -0.534867 | -0.314748 | -0.027201 |
| C | -0.212979 | 0.389026  | 1.135794  |
| C | -0.971130 | 1.505484  | 1.602761  |
| C | 0.127202  | -1.624190 | -0.447984 |
| C | 1.688749  | -1.632754 | -0.503328 |
| C | 2.474577  | -1.441080 | 0.819263  |
| O | 0.836902  | 0.035826  | 1.927013  |
| C | -0.492698 | -2.823671 | 0.328768  |
| C | -1.901628 | -3.265072 | -0.125902 |
| C | -1.895719 | -3.905847 | -1.522786 |
| C | -2.501241 | -4.235774 | 0.904998  |
| C | 2.208512  | -0.597170 | -1.529974 |
| C | 2.406680  | 0.805418  | -0.995342 |
| C | 2.424345  | 1.045356  | 0.325033  |
| C | 2.200888  | -0.025351 | 1.348906  |
| C | 2.633948  | 1.881250  | -2.048964 |
| C | 1.298894  | 2.312833  | -2.697543 |
| C | 3.405595  | 3.110734  | -1.547690 |
| H | 1.949909  | -2.630856 | -0.883029 |
| C | -0.625534 | 2.205998  | 2.818697  |
| O | -1.273252 | 3.178557  | 3.252022  |
| O | -2.814298 | 2.985299  | 1.243672  |
| C | -3.493169 | 1.778414  | -1.201642 |
| O | -3.806303 | 1.255486  | -2.287000 |
| O | -1.908124 | -0.402769 | -1.950915 |
| C | 2.247787  | -2.494757 | 1.907033  |
| O | 3.888240  | -1.429202 | 0.509980  |
| H | -0.153716 | -1.766048 | -1.494303 |
| H | 0.177028  | -3.690064 | 0.234579  |
| H | -0.540772 | -2.581553 | 1.394989  |
| H | -2.549288 | -2.379173 | -0.161812 |
| H | -2.908705 | -4.200261 | -1.818672 |
| H | -1.520258 | -3.222838 | -2.290312 |
| H | -1.271797 | -4.809311 | -1.532301 |
| H | -3.507921 | -4.552228 | 0.610251  |
| H | -2.571670 | -3.774797 | 1.896840  |
| H | -1.884810 | -5.139296 | 0.999287  |
| H | 1.533147  | -0.571884 | -2.394040 |
| H | 3.180213  | -0.929324 | -1.917058 |
| H | 2.599113  | 2.046287  | 0.708564  |
| H | 2.828313  | 0.146081  | 2.227723  |
| H | 3.239794  | 1.412012  | -2.839241 |
| H | 1.484455  | 3.003633  | -3.527227 |

|   |           |           |           |
|---|-----------|-----------|-----------|
| H | 0.735385  | 1.462130  | -3.092545 |
| H | 0.665787  | 2.825646  | -1.965024 |
| H | 3.624293  | 3.782274  | -2.384658 |
| H | 4.354257  | 2.827567  | -1.080817 |
| H | 2.823529  | 3.683748  | -0.817035 |
| H | 0.250824  | 1.849102  | 3.375699  |
| H | -2.412508 | 3.304251  | 2.108335  |
| H | -4.067191 | 2.638135  | -0.828991 |
| H | -2.691286 | 0.085708  | -2.348059 |
| H | 2.986222  | -2.342114 | 2.701356  |
| H | 1.256623  | -2.434175 | 2.352848  |
| H | 2.380016  | -3.505124 | 1.501838  |
| H | 4.200292  | -2.343433 | 0.480987  |

**Conformer 16:**

|   |           |           |           |
|---|-----------|-----------|-----------|
| C | 2.125584  | -2.084791 | 0.590815  |
| C | 2.348782  | -1.430854 | -0.641363 |
| C | 1.577861  | -0.268334 | -0.947478 |
| C | 0.606803  | 0.267171  | -0.065524 |
| C | 0.369332  | -0.454851 | 1.106319  |
| C | 1.120182  | -1.613641 | 1.471441  |
| C | -0.030510 | 1.616686  | -0.388286 |
| C | -1.586231 | 1.706717  | -0.296435 |
| C | -2.247664 | 1.508854  | 1.086166  |
| O | -0.587989 | -0.085004 | 2.001373  |
| C | 0.720017  | 2.763382  | 0.352978  |
| C | 2.096594  | 3.154307  | -0.229122 |
| C | 1.983073  | 3.835529  | -1.602083 |
| C | 2.840147  | 4.066736  | 0.760432  |
| C | -2.258351 | 0.736827  | -1.299652 |
| C | -2.441124 | -0.682401 | -0.801371 |
| C | -2.339794 | -0.967202 | 0.506896  |
| C | -1.992170 | 0.059940  | 1.540929  |
| C | -2.778349 | -1.722992 | -1.860676 |
| C | -2.723761 | -3.177275 | -1.373098 |
| C | -4.149507 | -1.430946 | -2.512677 |
| H | -1.834824 | 2.727275  | -0.613173 |
| C | 0.865196  | -2.331113 | 2.699437  |
| O | 1.508779  | -3.340842 | 3.045297  |
| O | 2.852428  | -3.158657 | 0.898386  |
| C | 3.337330  | -1.918988 | -1.576442 |
| O | 3.564131  | -1.382102 | -2.676281 |
| O | 1.787021  | 0.348317  | -2.113556 |
| C | -1.865617 | 2.514438  | 2.175937  |
| O | -3.662392 | 1.652041  | 0.831344  |
| H | 0.155790  | 1.774892  | -1.453133 |
| H | 0.085951  | 3.660808  | 0.348344  |
| H | 0.862122  | 2.487389  | 1.402527  |
| H | 2.695032  | 2.241817  | -0.351416 |
| H | 2.974692  | 4.093315  | -1.990220 |
| H | 1.501915  | 3.192825  | -2.345036 |
| H | 1.404203  | 4.765409  | -1.526719 |
| H | 3.826734  | 4.346488  | 0.374633  |
| H | 2.986061  | 3.574296  | 1.728681  |
| H | 2.279256  | 4.993582  | 0.937912  |
| H | -1.679749 | 0.720970  | -2.232606 |
| H | -3.245560 | 1.134948  | -1.558692 |
| H | -2.475378 | -1.981433 | 0.870240  |
| H | -2.544825 | -0.127666 | 2.468538  |
| H | -2.017717 | -1.611380 | -2.649054 |
| H | -2.885073 | -3.858015 | -2.215291 |
| H | -1.754738 | -3.421349 | -0.926208 |
| H | -3.504351 | -3.384167 | -0.631841 |
| H | -4.355604 | -2.161249 | -3.302455 |
| H | -4.190468 | -0.435297 | -2.963256 |
| H | -4.951259 | -1.498993 | -1.768557 |
| H | 0.064083  | -1.952933 | 3.348271  |
| H | 2.523925  | -3.483385 | 1.791149  |
| H | 3.906070  | -2.811948 | -1.282003 |
| H | 2.503598  | -0.162261 | -2.598438 |
| H | -2.524002 | 2.372763  | 3.043809  |



|   |           |          |          |
|---|-----------|----------|----------|
| H | -0.843342 | 2.389067 | 2.528071 |
| H | -1.999961 | 3.537546 | 1.813832 |
| H | -4.125348 | 1.723480 | 1.676736 |

**Conformer 17:**

|   |           |           |           |
|---|-----------|-----------|-----------|
| C | 2.080109  | -2.124222 | 0.594515  |
| C | 2.323158  | -1.476938 | -0.637590 |
| C | 1.579929  | -0.297776 | -0.948225 |
| C | 0.617397  | 0.259431  | -0.070882 |
| C | 0.359263  | -0.454635 | 1.101552  |
| C | 1.082499  | -1.629178 | 1.470907  |
| C | 0.008365  | 1.620475  | -0.396977 |
| C | -1.547583 | 1.732015  | -0.307873 |
| C | -2.222326 | 1.548389  | 1.075578  |
| O | -0.590582 | -0.059150 | 1.993328  |
| C | 0.774375  | 2.753176  | 0.348948  |
| C | 2.163337  | 3.116020  | -0.221721 |
| C | 2.075397  | 3.797842  | -1.596249 |
| C | 2.916899  | 4.014107  | 0.773330  |
| C | -2.228561 | 0.767634  | -1.310117 |
| C | -2.450842 | -0.642308 | -0.800365 |
| C | -2.360102 | -0.921386 | 0.509691  |
| C | -1.993248 | 0.102762  | 1.539619  |
| C | -2.815529 | -1.680454 | -1.853390 |
| C | -2.791841 | -3.132889 | -1.357669 |
| C | -4.183150 | -1.361790 | -2.500480 |
| H | -1.773479 | 2.756903  | -0.635182 |
| C | 0.806863  | -2.339016 | 2.699212  |
| O | 1.426597  | -3.362455 | 3.048105  |
| O | 2.781107  | -3.213909 | 0.906049  |
| C | 3.304582  | -1.987942 | -1.567832 |
| O | 3.548326  | -1.457032 | -2.667044 |
| O | 1.808192  | 0.313565  | -2.113717 |
| C | -1.831853 | 2.551451  | 2.164625  |
| O | -3.656043 | 1.632497  | 0.897438  |
| H | 0.202426  | 1.775789  | -1.460902 |
| H | 0.158446  | 3.663439  | 0.337677  |
| H | 0.901565  | 2.476086  | 1.400042  |
| H | 2.743982  | 2.191374  | -0.338181 |
| H | 3.075270  | 4.035327  | -1.976018 |
| H | 1.588008  | 3.163976  | -2.342721 |
| H | 1.514900  | 4.739460  | -1.526722 |
| H | 3.912225  | 4.273247  | 0.395721  |
| H | 3.044454  | 3.519817  | 1.743185  |
| H | 2.373662  | 4.952486  | 0.945255  |
| H | -1.639028 | 0.728049  | -2.235519 |
| H | -3.203915 | 1.182241  | -1.588083 |
| H | -2.525036 | -1.928878 | 0.879071  |
| H | -2.553145 | -0.061332 | 2.464333  |
| H | -2.056209 | -1.590671 | -2.645818 |
| H | -2.970386 | -3.814574 | -2.195627 |
| H | -1.827251 | -3.395668 | -0.911820 |
| H | -3.574779 | -3.318126 | -0.613296 |
| H | -4.410497 | -2.093375 | -3.283238 |
| H | -4.203286 | -0.369300 | -2.959667 |
| H | -4.981881 | -1.404848 | -1.751398 |
| H | 0.012305  | -1.942090 | 3.344797  |
| H | 2.441891  | -3.529810 | 1.798147  |
| H | 3.851771  | -2.893257 | -1.270353 |
| H | 2.515241  | -0.213636 | -2.594950 |
| H | -2.502275 | 2.417801  | 3.020325  |
| H | -0.809626 | 2.418230  | 2.514046  |
| H | -1.937856 | 3.580268  | 1.800037  |
| H | -3.911091 | 2.564348  | 0.921940  |

**Conformer 19:**

|   |           |           |           |
|---|-----------|-----------|-----------|
| C | -3.206602 | -0.431857 | 0.501714  |
| C | -2.749171 | -1.078156 | -0.668107 |
| C | -1.343218 | -1.153659 | -0.897922 |
| C | -0.377760 | -0.609780 | -0.010846 |
| C | -0.877960 | 0.048608  | 1.114920  |

|   |           |           |           |
|---|-----------|-----------|-----------|
| C | -2.276916 | 0.147969  | 1.399067  |
| C | 1.091445  | -0.920836 | -0.298511 |
| C | 2.136598  | 0.214723  | -0.085958 |
| C | 2.275137  | 0.830426  | 1.323860  |
| O | -0.077888 | 0.615435  | 2.058190  |
| C | 1.431744  | -2.308026 | 0.325960  |
| C | 2.804072  | -2.924780 | -0.020815 |
| C | 2.964774  | -4.266330 | 0.714093  |
| C | 3.002528  | -3.113934 | -1.533571 |
| C | 1.918767  | 1.363176  | -1.105314 |
| C | 0.898493  | 2.400420  | -0.692944 |
| C | 0.499870  | 2.499665  | 0.584832  |
| C | 0.972303  | 1.578055  | 1.666312  |
| C | 0.379499  | 3.364857  | -1.748674 |
| C | 1.521050  | 4.133661  | -2.443724 |
| C | -0.519407 | 2.661273  | -2.786495 |
| H | 3.110246  | -0.229391 | -0.319076 |
| C | -2.767934 | 0.841974  | 2.567370  |
| O | -3.979704 | 0.940493  | 2.843378  |
| O | -4.516462 | -0.363550 | 0.736385  |
| C | -3.676150 | -1.665532 | -1.608787 |
| O | -3.318998 | -2.250698 | -2.647852 |
| O | -0.908421 | -1.783995 | -1.991707 |
| C | 2.673232  | -0.132511 | 2.446210  |
| O | 3.326742  | 1.810310  | 1.183798  |
| H | 1.127539  | -1.086974 | -1.377983 |
| H | 1.319774  | -2.272206 | 1.413875  |
| H | 0.660268  | -3.004706 | -0.027635 |
| H | 3.598061  | -2.258383 | 0.343296  |
| H | 3.948034  | -4.708399 | 0.518202  |
| H | 2.861209  | -4.145172 | 1.798498  |
| H | 2.204661  | -4.985982 | 0.385092  |
| H | 3.962718  | -3.599395 | -1.740604 |
| H | 2.992743  | -2.164107 | -2.078182 |
| H | 2.210106  | -3.744961 | -1.954445 |
| H | 1.645603  | 0.933797  | -2.076422 |
| H | 2.873108  | 1.880069  | -1.259242 |
| H | -0.217543 | 3.264567  | 0.876921  |
| H | 1.117440  | 2.130596  | 2.601943  |
| H | -0.243287 | 4.101461  | -1.224139 |
| H | 1.108881  | 4.890199  | -3.120272 |
| H | 2.161402  | 4.641779  | -1.715125 |
| H | 2.151222  | 3.466230  | -3.041894 |
| H | -0.934763 | 3.396343  | -3.484639 |
| H | -1.353946 | 2.143152  | -2.303776 |
| H | 0.038624  | 1.926665  | -3.377342 |
| H | -2.024864 | 1.298200  | 3.234310  |
| H | -4.628767 | 0.143084  | 1.597979  |
| H | -4.746578 | -1.580050 | -1.375760 |
| H | -1.717451 | -2.103414 | -2.495156 |
| H | 2.901555  | 0.442702  | 3.353616  |
| H | 1.877255  | -0.829392 | 2.704964  |
| H | 3.569782  | -0.692523 | 2.167330  |
| H | 3.578453  | 2.125788  | 2.062134  |

**Conformer 20:**

|   |           |           |           |
|---|-----------|-----------|-----------|
| C | -3.198986 | -0.450341 | 0.509820  |
| C | -2.744331 | -1.094600 | -0.662386 |
| C | -1.339161 | -1.165098 | -0.898222 |
| C | -0.372796 | -0.618086 | -0.014807 |
| C | -0.869731 | 0.037393  | 1.114264  |
| C | -2.267545 | 0.131270  | 1.404283  |
| C | 1.096648  | -0.921138 | -0.306871 |
| C | 2.130067  | 0.227875  | -0.096947 |
| C | 2.272431  | 0.850192  | 1.314857  |
| O | -0.066554 | 0.603397  | 2.054853  |
| C | 1.448893  | -2.302997 | 0.321875  |
| C | 2.823984  | -2.912350 | -0.026913 |
| C | 2.996653  | -4.249780 | 0.712763  |
| C | 3.019457  | -3.105798 | -1.539544 |
| C | 1.892201  | 1.372986  | -1.115365 |

|   |           |           |           |
|---|-----------|-----------|-----------|
| C | 0.872673  | 2.406374  | -0.689966 |
| C | 0.483830  | 2.501571  | 0.590885  |
| C | 0.968782  | 1.582018  | 1.668159  |
| C | 0.344314  | 3.373537  | -1.738894 |
| C | 1.478903  | 4.152354  | -2.434291 |
| C | -0.555734 | 2.671866  | -2.776906 |
| H | 3.104998  | -0.212420 | -0.342499 |
| C | -2.756105 | 0.823683  | 2.574947  |
| O | -3.967215 | 0.918132  | 2.854982  |
| O | -4.507994 | -0.386427 | 0.749964  |
| C | -3.673017 | -1.684333 | -1.599774 |
| O | -3.317861 | -2.267585 | -2.640709 |
| O | -0.906365 | -1.793895 | -1.994021 |
| C | 2.688930  | -0.105846 | 2.436221  |
| O | 3.254913  | 1.910058  | 1.249737  |
| H | 1.131074  | -1.090509 | -1.385902 |
| H | 1.339975  | -2.263751 | 1.410000  |
| H | 0.681150  | -3.006314 | -0.026593 |
| H | 3.614979  | -2.239351 | 0.332690  |
| H | 3.982157  | -4.686147 | 0.515265  |
| H | 2.895496  | -4.125120 | 1.796949  |
| H | 2.240354  | -4.975655 | 0.388958  |
| H | 3.982311  | -3.585444 | -1.747994 |
| H | 3.000229  | -2.158376 | -2.088185 |
| H | 2.230259  | -3.744114 | -1.955231 |
| H | 1.607306  | 0.941538  | -2.082163 |
| H | 2.839896  | 1.897329  | -1.285460 |
| H | -0.231633 | 3.265176  | 0.890423  |
| H | 1.123561  | 2.130422  | 2.601513  |
| H | -0.279389 | 4.104200  | -1.207423 |
| H | 1.060024  | 4.911677  | -3.103535 |
| H | 2.120258  | 4.658256  | -1.705059 |
| H | 2.108777  | 3.491978  | -3.040789 |
| H | -0.978856 | 3.409107  | -3.468074 |
| H | -1.384899 | 2.145736  | -2.293544 |
| H | 0.003332  | 1.944448  | -3.375739 |
| H | -2.011996 | 1.282195  | 3.239080  |
| H | -4.618084 | 0.119621  | 1.612468  |
| H | -4.742831 | -1.602534 | -1.362633 |
| H | -1.716615 | -2.115497 | -2.494305 |
| H | 2.915224  | 0.480364  | 3.333116  |
| H | 1.906873  | -0.819744 | 2.691113  |
| H | 3.588296  | -0.665704 | 2.154115  |
| H | 4.134232  | 1.514690  | 1.317870  |

**Conformer 21:**

|   |           |           |           |
|---|-----------|-----------|-----------|
| C | 2.455527  | -1.526781 | 0.750422  |
| C | 2.512190  | -1.002503 | -0.560619 |
| C | 1.515042  | -0.064113 | -0.964989 |
| C | 0.474075  | 0.371874  | -0.107641 |
| C | 0.416092  | -0.228628 | 1.151338  |
| C | 1.397529  | -1.155928 | 1.616775  |
| C | -0.453074 | 1.491789  | -0.571777 |
| C | -1.986636 | 1.228464  | -0.424576 |
| C | -2.572124 | 1.086055  | 0.999164  |
| O | -0.578297 | 0.052118  | 2.039114  |
| C | -0.009081 | 2.894235  | -0.053377 |
| C | 1.253765  | 3.509309  | -0.714959 |
| C | 1.109215  | 5.038515  | -0.808679 |
| C | 2.551571  | 3.159001  | 0.033228  |
| C | -2.421489 | -0.003162 | -1.260142 |
| C | -2.296331 | -1.337082 | -0.556268 |
| C | -2.124283 | -1.401980 | 0.773769  |
| C | -1.988010 | -0.187880 | 1.639453  |
| C | -2.430013 | -2.605663 | -1.385684 |
| C | -3.763940 | -2.656434 | -2.157718 |
| C | -1.236505 | -2.806962 | -2.342231 |
| H | -2.473081 | 2.106552  | -0.867112 |
| C | 1.324676  | -1.745854 | 2.933809  |
| O | 2.168305  | -2.555108 | 3.365849  |
| O | 3.392404  | -2.387189 | 1.147461  |

|   |           |           |           |
|---|-----------|-----------|-----------|
| C | 3.560285  | -1.395013 | -1.476133 |
| O | 3.650244  | -0.963161 | -2.639900 |
| O | 1.574336  | 0.438484  | -2.200409 |
| C | -2.419083 | 2.295343  | 1.926270  |
| O | -3.984276 | 0.871979  | 0.783446  |
| H | -0.321103 | 1.540698  | -1.656694 |
| H | -0.850641 | 3.573734  | -0.236990 |
| H | 0.142465  | 2.878437  | 1.030739  |
| H | 1.332868  | 3.117965  | -1.737595 |
| H | 1.997173  | 5.492238  | -1.263226 |
| H | 0.240338  | 5.323007  | -1.413189 |
| H | 0.983687  | 5.482929  | 0.187280  |
| H | 3.423741  | 3.574772  | -0.483705 |
| H | 2.704629  | 2.081001  | 0.126089  |
| H | 2.535199  | 3.579273  | 1.047221  |
| H | -1.851983 | -0.020283 | -2.197042 |
| H | -3.472254 | 0.122183  | -1.545621 |
| H | -2.058718 | -2.368470 | 1.270159  |
| H | -2.465119 | -0.353452 | 2.612005  |
| H | -2.426300 | -3.445489 | -0.678411 |
| H | -3.875796 | -3.627306 | -2.652524 |
| H | -4.618542 | -2.515531 | -1.487772 |
| H | -3.810466 | -1.884834 | -2.934118 |
| H | -1.331765 | -3.764556 | -2.865830 |
| H | -0.286554 | -2.811847 | -1.798630 |
| H | -1.186981 | -2.020438 | -3.103049 |
| H | 0.480503  | -1.453112 | 3.572094  |
| H | 3.159334  | -2.653893 | 2.088213  |
| H | 4.304874  | -2.113185 | -1.105563 |
| H | 2.368155  | 0.023611  | -2.655483 |
| H | -3.034332 | 2.140587  | 2.823047  |
| H | -1.394605 | 2.439824  | 2.264837  |
| H | -2.768071 | 3.205365  | 1.430529  |
| H | -4.444767 | 0.953625  | 1.629256  |

**Conformer 23:**

|   |           |           |           |
|---|-----------|-----------|-----------|
| C | 2.437463  | -1.548209 | 0.753155  |
| C | 2.505094  | -1.025601 | -0.558198 |
| C | 1.520465  | -0.076070 | -0.966834 |
| C | 0.481798  | 0.371870  | -0.113392 |
| C | 0.411906  | -0.226345 | 1.146189  |
| C | 1.380977  | -1.164163 | 1.615636  |
| C | -0.432876 | 1.500069  | -0.580403 |
| C | -1.968951 | 1.242597  | -0.433395 |
| C | -2.564070 | 1.104751  | 0.991787  |
| O | -0.580870 | 0.069672  | 2.030442  |
| C | 0.018537  | 2.898167  | -0.058068 |
| C | 1.290462  | 3.503499  | -0.710975 |
| C | 1.160754  | 5.034277  | -0.800773 |
| C | 2.580786  | 3.138696  | 0.043172  |
| C | -2.405428 | 0.010567  | -1.267192 |
| C | -2.304466 | -1.320375 | -0.552860 |
| C | -2.139083 | -1.380848 | 0.778040  |
| C | -1.992222 | -0.165341 | 1.639549  |
| C | -2.455216 | -2.591765 | -1.375447 |
| C | -3.790439 | -2.629884 | -2.146007 |
| C | -1.265090 | -2.815504 | -2.331094 |
| H | -2.444380 | 2.124432  | -0.885908 |
| C | 1.296633  | -1.752058 | 2.933213  |
| O | 2.129647  | -2.570498 | 3.368308  |
| O | 3.362781  | -2.419148 | 1.154087  |
| C | 3.551920  | -1.430555 | -1.469639 |
| O | 3.651126  | -1.000128 | -2.633243 |
| O | 1.590201  | 0.425635  | -2.202307 |
| C | -2.410858 | 2.314863  | 1.917688  |
| O | -3.978742 | 0.826276  | 0.865790  |
| H | -0.296728 | 1.549425  | -1.664820 |
| H | -0.816215 | 3.585131  | -0.246770 |
| H | 0.162603  | 2.880436  | 1.027016  |
| H | 1.371412  | 3.114423  | -1.734369 |
| H | 2.055316  | 5.481058  | -1.249126 |

|   |           |           |           |
|---|-----------|-----------|-----------|
| H | 0.297959  | 5.328877  | -1.409275 |
| H | 1.034081  | 5.476883  | 0.195844  |
| H | 3.459516  | 3.548064  | -0.467681 |
| H | 2.723199  | 2.059039  | 0.133099  |
| H | 2.562772  | 3.555689  | 1.058465  |
| H | -1.823690 | -0.019669 | -2.196215 |
| H | -3.450959 | 0.141779  | -1.569232 |
| H | -2.092361 | -2.345395 | 1.279874  |
| H | -2.477028 | -0.315576 | 2.607901  |
| H | -2.462783 | -3.427034 | -0.662988 |
| H | -3.916361 | -3.602882 | -2.633207 |
| H | -4.641984 | -2.472080 | -1.475987 |
| H | -3.826761 | -1.864095 | -2.928850 |
| H | -1.372459 | -3.775986 | -2.847009 |
| H | -0.314904 | -2.827859 | -1.787978 |
| H | -1.206113 | -2.035928 | -3.098457 |
| H | 0.453726  | -1.449228 | 3.568385  |
| H | 3.123166  | -2.682171 | 2.094458  |
| H | 4.286852  | -2.157069 | -1.096085 |
| H | 2.380942  | 0.001131  | -2.653978 |
| H | -3.034348 | 2.156988  | 2.804222  |
| H | -1.384898 | 2.461387  | 2.250820  |
| H | -2.744310 | 3.232616  | 1.418845  |
| H | -4.446972 | 1.667317  | 0.779480  |

**Conformer 24:**

|   |           |           |           |
|---|-----------|-----------|-----------|
| C | -2.920605 | -1.091213 | 0.698015  |
| C | -2.380384 | -1.743797 | -0.432475 |
| C | -1.006019 | -1.529583 | -0.748954 |
| C | -0.152098 | -0.692807 | 0.015085  |
| C | -0.737901 | -0.042204 | 1.103689  |
| C | -2.108593 | -0.225270 | 1.470505  |
| C | 1.335399  | -0.697919 | -0.336828 |
| C | 2.091158  | 0.665954  | -0.305884 |
| C | 2.147106  | 1.455073  | 1.026345  |
| O | -0.045192 | 0.784396  | 1.932312  |
| C | 2.012702  | -1.891396 | 0.401683  |
| C | 3.474748  | -2.219240 | 0.029043  |
| C | 3.972336  | -3.396291 | 0.884945  |
| C | 3.649298  | -2.530716 | -1.466348 |
| C | 1.554765  | 1.612432  | -1.408700 |
| C | 0.350165  | 2.442478  | -1.022850 |
| C | 0.004038  | 2.593776  | 0.264425  |
| C | 0.728220  | 1.918592  | 1.388794  |
| C | -0.380711 | 3.114812  | -2.177011 |
| C | -1.307356 | 2.111451  | -2.900793 |
| C | -1.161967 | 4.378155  | -1.787371 |
| H | 3.129294  | 0.427635  | -0.570966 |
| C | -2.693138 | 0.467795  | 2.595849  |
| O | -3.882348 | 0.324773  | 2.941526  |
| O | -4.199827 | -1.289959 | 1.013364  |
| C | -3.189851 | -2.620543 | -1.247856 |
| O | -2.755044 | -3.220695 | -2.248210 |
| O | -0.487972 | -2.161908 | -1.805210 |
| C | 2.811852  | 0.741819  | 2.207169  |
| O | 2.863896  | 2.690246  | 0.795540  |
| H | 1.365239  | -0.973015 | -1.394013 |
| H | 1.940601  | -1.757440 | 1.485343  |
| H | 1.409078  | -2.779619 | 0.173008  |
| H | 4.107775  | -1.353665 | 0.269874  |
| H | 5.022156  | -3.625017 | 0.670027  |
| H | 3.888284  | -3.177980 | 1.955691  |
| H | 3.386321  | -4.301479 | 0.682573  |
| H | 4.686353  | -2.807743 | -1.686295 |
| H | 3.396555  | -1.676866 | -2.103562 |
| H | 3.007935  | -3.368262 | -1.766778 |
| H | 1.330043  | 1.029410  | -2.310195 |
| H | 2.346349  | 2.316600  | -1.695624 |
| H | -0.839626 | 3.216763  | 0.547185  |
| H | 0.794784  | 2.582939  | 2.254826  |
| H | 0.395132  | 3.416194  | -2.897493 |

|   |           |           |           |
|---|-----------|-----------|-----------|
| H | -1.742257 | 2.570588  | -3.795282 |
| H | -0.775136 | 1.208496  | -3.215340 |
| H | -2.128327 | 1.805974  | -2.242777 |
| H | -1.565395 | 4.860573  | -2.683943 |
| H | -0.524690 | 5.101212  | -1.268481 |
| H | -2.011681 | 4.143682  | -1.136256 |
| H | -2.045151 | 1.148851  | 3.162682  |
| H | -4.386165 | -0.729106 | 1.827496  |
| H | -4.240205 | -2.750323 | -0.952334 |
| H | -1.224898 | -2.705748 | -2.219396 |
| H | 2.936914  | 1.457786  | 3.026305  |
| H | 2.220430  | -0.093541 | 2.579493  |
| H | 3.801717  | 0.364595  | 1.924764  |
| H | 3.811472  | 2.505528  | 0.842026  |

**Conformer 27:**

|   |           |           |           |
|---|-----------|-----------|-----------|
| C | -3.156111 | -0.709931 | 0.444269  |
| C | -2.648984 | -1.344742 | -0.711181 |
| C | -1.240227 | -1.324201 | -0.935587 |
| C | -0.319652 | -0.696708 | -0.056151 |
| C | -0.870335 | -0.051778 | 1.053810  |
| C | -2.273962 | -0.047241 | 1.332333  |
| C | 1.169401  | -0.912133 | -0.329733 |
| C | 2.134104  | 0.295660  | -0.136636 |
| C | 2.219312  | 0.952487  | 1.258428  |
| O | -0.116779 | 0.592513  | 1.985492  |
| C | 1.599021  | -2.258559 | 0.328275  |
| C | 3.013621  | -2.786720 | 0.005854  |
| C | 3.260085  | -4.096852 | 0.772940  |
| C | 3.237860  | -2.995795 | -1.500654 |
| C | 1.847529  | 1.405288  | -1.180441 |
| C | 0.743977  | 2.372203  | -0.806949 |
| C | 0.327493  | 2.470794  | 0.465199  |
| C | 0.865854  | 1.616040  | 1.571874  |
| C | 0.190993  | 3.227301  | -1.938906 |
| C | -1.064940 | 4.033334  | -1.580800 |
| C | 1.279414  | 4.163106  | -2.513196 |
| H | 3.137151  | -0.086866 | -0.353815 |
| C | -2.818179 | 0.633954  | 2.484467  |
| O | -4.035058 | 0.651386  | 2.755061  |
| O | -4.468425 | -0.731074 | 0.674397  |
| C | -3.527950 | -2.013508 | -1.643455 |
| O | -3.125878 | -2.590776 | -2.670492 |
| O | -0.757109 | -1.942679 | -2.015931 |
| C | 2.673038  | 0.046230  | 2.406425  |
| O | 3.202068  | 1.999452  | 1.102286  |
| H | 1.224609  | -1.099166 | -1.404961 |
| H | 1.475218  | -2.206502 | 1.414315  |
| H | 0.880397  | -3.014477 | -0.014945 |
| H | 3.756559  | -2.058900 | 0.360055  |
| H | 4.273163  | -4.474148 | 0.594298  |
| H | 3.139088  | -3.958451 | 1.853468  |
| H | 2.554321  | -4.874696 | 0.455520  |
| H | 4.231244  | -3.417694 | -1.689592 |
| H | 3.166708  | -2.061482 | -2.067132 |
| H | 2.494928  | -3.689916 | -1.912382 |
| H | 1.612242  | 0.941919  | -2.147449 |
| H | 2.766548  | 1.981911  | -1.333255 |
| H | -0.458208 | 3.166356  | 0.744697  |
| H | 0.964840  | 2.203395  | 2.492259  |
| H | -0.085392 | 2.525982  | -2.741740 |
| H | -1.446079 | 4.543221  | -2.471565 |
| H | -1.864098 | 3.392947  | -1.194139 |
| H | -0.850006 | 4.803057  | -0.830488 |
| H | 0.878725  | 4.736795  | -3.355741 |
| H | 2.152294  | 3.611302  | -2.873339 |
| H | 1.618760  | 4.872290  | -1.749555 |
| H | -2.112332 | 1.155834  | 3.143729  |
| H | -4.620112 | -0.216207 | 1.525008  |
| H | -4.602744 | -1.999808 | -1.415229 |
| H | -1.539281 | -2.328410 | -2.515444 |

|   |          |           |          |
|---|----------|-----------|----------|
| H | 2.850210 | 0.656421  | 3.302371 |
| H | 1.926345 | -0.700030 | 2.674128 |
| H | 3.610192 | -0.454126 | 2.148261 |
| H | 3.425983 | 2.349482  | 1.975050 |

**Conformer 28:**

|   |           |           |           |
|---|-----------|-----------|-----------|
| C | -3.145008 | -0.736432 | 0.450933  |
| C | -2.638080 | -1.369213 | -0.705919 |
| C | -1.230310 | -1.340218 | -0.935239 |
| C | -0.311573 | -0.705693 | -0.059659 |
| C | -0.861595 | -0.063487 | 1.052368  |
| C | -2.263933 | -0.067882 | 1.335699  |
| C | 1.177958  | -0.909055 | -0.336438 |
| C | 2.125778  | 0.314850  | -0.148078 |
| C | 2.211674  | 0.980916  | 1.247970  |
| O | -0.107421 | 0.583591  | 1.981105  |
| C | 1.623189  | -2.246552 | 0.328478  |
| C | 3.041602  | -2.763517 | 0.004669  |
| C | 3.303531  | -4.066476 | 0.778810  |
| C | 3.263722  | -2.979094 | -1.501266 |
| C | 1.815647  | 1.417005  | -1.192753 |
| C | 0.710604  | 2.378283  | -0.807374 |
| C | 0.303246  | 2.473804  | 0.467732  |
| C | 0.855945  | 1.624840  | 1.571360  |
| C | 0.146433  | 3.233728  | -1.933880 |
| C | -1.115939 | 4.025960  | -1.567420 |
| C | 1.223936  | 4.183814  | -2.505443 |
| H | 3.131295  | -0.061002 | -0.376883 |
| C | -2.808420 | 0.610601  | 2.489689  |
| O | -4.024494 | 0.620065  | 2.763861  |
| O | -4.456298 | -0.765390 | 0.685620  |
| C | -3.515930 | -2.044574 | -1.634358 |
| O | -3.113614 | -2.620736 | -2.662002 |
| O | -0.746541 | -1.957531 | -2.016307 |
| C | 2.685935  | 0.086221  | 2.396562  |
| O | 3.115522  | 2.107286  | 1.163003  |
| H | 1.232867  | -1.101200 | -1.410778 |
| H | 1.502249  | -2.189087 | 1.414578  |
| H | 0.911009  | -3.011573 | -0.007884 |
| H | 3.778977  | -2.026577 | 0.352810  |
| H | 4.319519  | -4.435381 | 0.599029  |
| H | 3.184376  | -3.922823 | 1.858804  |
| H | 2.604170  | -4.852704 | 0.468218  |
| H | 4.260611  | -3.392381 | -1.691051 |
| H | 3.180526  | -2.049206 | -2.073457 |
| H | 2.526567  | -3.683085 | -1.906337 |
| H | 1.569428  | 0.948475  | -2.154546 |
| H | 2.726005  | 2.002558  | -1.363823 |
| H | -0.482311 | 3.166686  | 0.753632  |
| H | 0.962727  | 2.209922  | 2.489123  |
| H | -0.125834 | 2.534602  | -2.740061 |
| H | -1.505679 | 4.535554  | -2.454646 |
| H | -1.906994 | 3.376010  | -1.180067 |
| H | -0.905492 | 4.794645  | -0.814903 |
| H | 0.814521  | 4.760474  | -3.341769 |
| H | 2.099983  | 3.642685  | -2.874378 |
| H | 1.560349  | 4.889592  | -1.737471 |
| H | -2.103718 | 1.137199  | 3.146349  |
| H | -4.607951 | -0.250899 | 1.536686  |
| H | -4.590034 | -2.037246 | -1.402641 |
| H | -1.528179 | -2.348532 | -2.512683 |
| H | 2.858488  | 0.709045  | 3.280626  |
| H | 1.956640  | -0.677913 | 2.661939  |
| H | 3.627473  | -0.411480 | 2.136274  |
| H | 4.020711  | 1.778383  | 1.244402  |

**Conformer 29:**

|   |          |           |           |
|---|----------|-----------|-----------|
| C | 2.051922 | -2.059321 | 0.627741  |
| C | 2.259464 | -1.497010 | -0.651886 |
| C | 1.520179 | -0.330333 | -1.013701 |
| C | 0.592412 | 0.294803  | -0.143653 |

|   |           |           |           |
|---|-----------|-----------|-----------|
| C | 0.364517  | -0.340415 | 1.078464  |
| C | 1.090511  | -1.494941 | 1.502329  |
| C | -0.032010 | 1.626357  | -0.551439 |
| C | -1.587621 | 1.727458  | -0.438777 |
| C | -2.227939 | 1.647038  | 0.965886  |
| O | -0.560589 | 0.117691  | 1.967414  |
| C | 0.717588  | 2.851836  | 0.055557  |
| C | 2.110349  | 3.179316  | -0.547735 |
| C | 2.338123  | 4.701196  | -0.556546 |
| C | 3.263321  | 2.489539  | 0.201810  |
| C | -2.279615 | 0.682042  | -1.349211 |
| C | -2.476199 | -0.687803 | -0.732126 |
| C | -2.357994 | -0.865820 | 0.593470  |
| C | -1.975861 | 0.237612  | 1.532106  |
| C | -2.849543 | -1.805758 | -1.696439 |
| C | -2.797087 | -3.216730 | -1.094594 |
| C | -4.233756 | -1.550956 | -2.336402 |
| H | -1.841045 | 2.719230  | -0.833398 |
| C | 0.850975  | -2.117624 | 2.784019  |
| O | 1.471272  | -3.123565 | 3.179769  |
| O | 2.751841  | -3.135058 | 0.986546  |
| C | 3.204973  | -2.079152 | -1.577900 |
| O | 3.419046  | -1.622443 | -2.715704 |
| O | 1.723521  | 0.206460  | -2.219261 |
| C | -1.820569 | 2.732032  | 1.966757  |
| O | -3.645001 | 1.783484  | 0.720312  |
| H | 0.135666  | 1.702165  | -1.629832 |
| H | 0.068399  | 3.722211  | -0.101740 |
| H | 0.828277  | 2.742582  | 1.139180  |
| H | 2.125116  | 2.833544  | -1.589565 |
| H | 3.322204  | 4.951059  | -0.968981 |
| H | 1.581233  | 5.216572  | -1.158879 |
| H | 2.292016  | 5.111185  | 0.460794  |
| H | 4.225017  | 2.709087  | -0.275367 |
| H | 3.150975  | 1.403065  | 0.235981  |
| H | 3.316975  | 2.849172  | 1.237601  |
| H | -1.710195 | 0.579744  | -2.282341 |
| H | -3.264333 | 1.069156  | -1.633309 |
| H | -2.504063 | -1.844120 | 1.041309  |
| H | -2.506496 | 0.132139  | 2.485168  |
| H | -2.107914 | -1.766906 | -2.509402 |
| H | -2.983861 | -3.961209 | -1.875351 |
| H | -1.820331 | -3.434361 | -0.650880 |
| H | -3.562344 | -3.354901 | -0.322037 |
| H | -4.466157 | -2.339150 | -3.060509 |
| H | -4.276803 | -0.593698 | -2.863474 |
| H | -5.017218 | -1.550959 | -1.570049 |
| H | 0.084367  | -1.667434 | 3.428579  |
| H | 2.441345  | -3.387191 | 1.908745  |
| H | 3.751238  | -2.970826 | -1.240222 |
| H | 2.407559  | -0.360265 | -2.688561 |
| H | -2.477895 | 2.676317  | 2.845128  |
| H | -0.799854 | 2.612563  | 2.325762  |
| H | -1.934083 | 3.724863  | 1.522782  |
| H | -4.095348 | 1.923632  | 1.563895  |

**Conformer 31:**

|   |           |           |           |
|---|-----------|-----------|-----------|
| C | 2.051922  | -2.059321 | 0.627741  |
| C | 2.259464  | -1.497010 | -0.651886 |
| C | 1.520179  | -0.330333 | -1.013701 |
| C | 0.592412  | 0.294803  | -0.143653 |
| C | 0.364517  | -0.340415 | 1.078464  |
| C | 1.090511  | -1.494941 | 1.502329  |
| C | -0.032010 | 1.626357  | -0.551439 |
| C | -1.587621 | 1.727458  | -0.438777 |
| C | -2.227939 | 1.647038  | 0.965886  |
| O | -0.560589 | 0.117691  | 1.967414  |
| C | 0.717588  | 2.851836  | 0.055557  |
| C | 2.110349  | 3.179316  | -0.547735 |
| C | 2.338123  | 4.701196  | -0.556546 |
| C | 3.263321  | 2.489539  | 0.201810  |



|   |           |           |           |
|---|-----------|-----------|-----------|
| C | -2.279615 | 0.682042  | -1.349211 |
| C | -2.476199 | -0.687803 | -0.732126 |
| C | -2.357994 | -0.865820 | 0.593470  |
| C | -1.975861 | 0.237612  | 1.532106  |
| C | -2.849543 | -1.805758 | -1.696439 |
| C | -2.797087 | -3.216730 | -1.094594 |
| C | -4.233756 | -1.550956 | -2.336402 |
| H | -1.841045 | 2.719230  | -0.833398 |
| C | 0.850975  | -2.117624 | 2.784019  |
| O | 1.471272  | -3.123565 | 3.179769  |
| O | 2.751841  | -3.135058 | 0.986546  |
| C | 3.204973  | -2.079152 | -1.577900 |
| O | 3.419046  | -1.622443 | -2.715704 |
| O | 1.723521  | 0.206460  | -2.219261 |
| C | -1.820569 | 2.732032  | 1.966757  |
| O | -3.645001 | 1.783484  | 0.720312  |
| H | 0.135666  | 1.702165  | -1.629832 |
| H | 0.068399  | 3.722211  | -0.101740 |
| H | 0.828277  | 2.742582  | 1.139180  |
| H | 2.125116  | 2.833544  | -1.589565 |
| H | 3.322204  | 4.951059  | -0.968981 |
| H | 1.581233  | 5.216572  | -1.158879 |
| H | 2.292016  | 5.111185  | 0.460794  |
| H | 4.225017  | 2.709087  | -0.275367 |
| H | 3.150975  | 1.403065  | 0.235981  |
| H | 3.316975  | 2.849172  | 1.237601  |
| H | -1.710195 | 0.579744  | -2.282341 |
| H | -3.264333 | 1.069156  | -1.633309 |
| H | -2.504063 | -1.844120 | 1.041309  |
| H | -2.506496 | 0.132139  | 2.485168  |
| H | -2.107914 | -1.766906 | -2.509402 |
| H | -2.983861 | -3.961209 | -1.875351 |
| H | -1.820331 | -3.434361 | -0.650880 |
| H | -3.562344 | -3.354901 | -0.322037 |
| H | -4.466157 | -2.339150 | -3.060509 |
| H | -4.276803 | -0.593698 | -2.863474 |
| H | -5.017218 | -1.550959 | -1.570049 |
| H | 0.084367  | -1.667434 | 3.428579  |
| H | 2.441345  | -3.387191 | 1.908745  |
| H | 3.751238  | -2.970826 | -1.240222 |
| H | 2.407559  | -0.360265 | -2.688561 |
| H | -2.477895 | 2.676317  | 2.845128  |
| H | -0.799854 | 2.612563  | 2.325762  |
| H | -1.934083 | 3.724863  | 1.522782  |
| H | -4.095348 | 1.923632  | 1.563895  |

**Table S19.** Eucalypcamal K (**2a**) DFT geometry optimized conformers calculated at the B3LYP/6-31+G(d,p) level of theory.

**Conformer 7:**

|   |           |           |           |
|---|-----------|-----------|-----------|
| C | 2.575236  | 0.858160  | -0.340123 |
| C | 2.616490  | -0.555269 | -0.472869 |
| C | 1.348768  | -1.233997 | -0.513062 |
| C | 0.107486  | -0.568409 | -0.407879 |
| C | 0.118010  | 0.814264  | -0.288935 |
| C | 1.337226  | 1.558416  | -0.255978 |
| C | -1.182269 | -1.352072 | -0.404745 |
| C | -2.328772 | -0.501202 | 0.149927  |
| O | -1.016680 | 1.546489  | -0.184852 |
| C | -3.709163 | -1.146592 | -0.045179 |
| C | -4.861986 | -0.219267 | 0.282728  |
| C | -4.672747 | 1.103884  | 0.411107  |
| C | -3.335519 | 1.790591  | 0.309053  |
| C | -6.246644 | -0.828033 | 0.455790  |
| H | -2.169502 | -0.366308 | 1.227216  |
| C | 1.339127  | 2.994398  | -0.162085 |
| C | -6.691634 | -1.641632 | -0.775389 |
| C | -6.342916 | -1.678572 | 1.739634  |

|   |           |           |           |
|---|-----------|-----------|-----------|
| C | 3.843256  | -1.358136 | -0.591551 |
| O | 3.748120  | -2.600794 | -0.737811 |
| O | 3.704343  | 1.563693  | -0.299899 |
| O | 1.296146  | -2.553527 | -0.647001 |
| O | 2.378679  | 3.686061  | -0.123405 |
| C | 5.238011  | -0.779103 | -0.527673 |
| C | 5.734415  | -0.501552 | 0.919915  |
| C | 5.840275  | -1.788676 | 1.751011  |
| C | 7.082617  | 0.231824  | 0.862833  |
| C | -2.313326 | 0.910982  | -0.448421 |
| C | -2.543118 | 0.973204  | -1.961313 |
| O | -2.904719 | 2.078535  | 1.644010  |
| H | -1.415486 | -1.704799 | -1.419497 |
| H | -1.058180 | -2.257016 | 0.199209  |
| H | -3.810859 | -1.496923 | -1.083273 |
| H | -3.767771 | -2.051270 | 0.572449  |
| H | -5.513569 | 1.748990  | 0.657301  |
| H | -3.448638 | 2.737502  | -0.241951 |
| H | -6.946631 | 0.009941  | 0.568452  |
| H | 0.364509  | 3.499581  | -0.128535 |
| H | -7.724636 | -1.983970 | -0.650455 |
| H | -6.644639 | -1.041048 | -1.690360 |
| H | -6.068025 | -2.531175 | -0.920156 |
| H | -7.371599 | -2.025861 | 1.886799  |
| H | -6.049623 | -1.099167 | 2.620739  |
| H | -5.703104 | -2.566840 | 1.688444  |
| H | 3.441818  | 2.537548  | -0.219911 |
| H | 2.264358  | -2.864592 | -0.713353 |
| H | 5.892863  | -1.524216 | -0.991734 |
| H | 5.287636  | 0.147991  | -1.101265 |
| H | 5.011014  | 0.167402  | 1.401029  |
| H | 6.176731  | -1.559317 | 2.768312  |
| H | 4.882983  | -2.313924 | 1.825055  |
| H | 6.562850  | -2.484337 | 1.307235  |
| H | 7.448630  | 0.451619  | 1.871948  |
| H | 6.997640  | 1.179637  | 0.320674  |
| H | 7.841651  | -0.380312 | 0.359555  |
| H | -1.800939 | 0.379881  | -2.502180 |
| H | -3.538172 | 0.604488  | -2.222088 |
| H | -2.463264 | 2.009066  | -2.304003 |
| H | -2.042093 | 2.514516  | 1.585230  |

**Conformer 8:**

|   |           |           |           |
|---|-----------|-----------|-----------|
| C | -2.551781 | 0.848634  | -0.339110 |
| C | -2.594804 | -0.567929 | -0.431948 |
| C | -1.338886 | -1.258420 | -0.307785 |
| C | -0.106401 | -0.599006 | -0.105154 |
| C | -0.116779 | 0.785463  | -0.008570 |
| C | -1.324922 | 1.539750  | -0.121904 |
| C | 1.178630  | -1.386807 | -0.028668 |
| C | 2.386523  | -0.472167 | -0.253999 |
| O | 1.009705  | 1.511995  | 0.185089  |
| C | 3.727548  | -1.155916 | 0.053244  |
| C | 4.904719  | -0.201659 | 0.063966  |
| C | 4.719849  | 1.127258  | 0.116897  |
| C | 3.373896  | 1.804458  | 0.110749  |
| C | 6.307662  | -0.791387 | 0.021401  |
| H | 2.397822  | -0.167673 | -1.308150 |
| C | -1.330506 | 2.973408  | 0.002444  |
| C | 6.561861  | -1.791765 | 1.166161  |
| C | 6.619328  | -1.432814 | -1.346932 |
| C | -3.809572 | -1.363484 | -0.666263 |
| O | -3.714400 | -2.611430 | -0.757203 |
| O | -3.670423 | 1.564279  | -0.442799 |
| O | -1.288250 | -2.582239 | -0.390271 |
| O | -2.359408 | 3.674801  | -0.097549 |
| C | -5.194037 | -0.769587 | -0.790108 |
| C | -5.859220 | -0.444248 | 0.577664  |
| C | -7.179156 | 0.302786  | 0.336075  |
| C | -6.084985 | -1.705294 | 1.424700  |
| C | 2.256689  | 0.828408  | 0.548513  |

|   |           |           |           |
|---|-----------|-----------|-----------|
| C | 2.242665  | 0.649286  | 2.069415  |
| O | 3.157081  | 2.302843  | -1.214064 |
| H | 1.254056  | -1.898179 | 0.941589  |
| H | 1.163484  | -2.183282 | -0.779940 |
| H | 3.668393  | -1.667905 | 1.025414  |
| H | 3.896196  | -1.951659 | -0.682760 |
| H | 5.580062  | 1.793407  | 0.112958  |
| H | 3.384615  | 2.651950  | 0.814077  |
| H | 7.004813  | 0.046079  | 0.153730  |
| H | -0.369733 | 3.466849  | 0.201498  |
| H | 7.606211  | -2.122108 | 1.156191  |
| H | 6.361071  | -1.340527 | 2.143988  |
| H | 5.935523  | -2.685856 | 1.069166  |
| H | 7.663245  | -1.763831 | -1.380255 |
| H | 6.461633  | -0.720433 | -2.162847 |
| H | 5.992503  | -2.311456 | -1.536820 |
| H | -3.409547 | 2.536733  | -0.342740 |
| H | -2.246391 | -2.886971 | -0.557009 |
| H | -5.161475 | 0.140285  | -1.391764 |
| H | -5.797227 | -1.522030 | -1.309123 |
| H | -5.189765 | 0.229998  | 1.124998  |
| H | -7.662445 | 0.555545  | 1.286417  |
| H | -7.014280 | 1.233655  | -0.216879 |
| H | -7.880100 | -0.314564 | -0.239835 |
| H | -6.537891 | -1.442432 | 2.387278  |
| H | -5.152148 | -2.240301 | 1.627964  |
| H | -6.759859 | -2.404358 | 0.915940  |
| H | 1.432685  | -0.013587 | 2.385478  |
| H | 3.188926  | 0.233091  | 2.423521  |
| H | 2.094780  | 1.619087  | 2.553602  |
| H | 2.290474  | 2.734682  | -1.226023 |

**Conformer 10:**

|   |           |           |           |
|---|-----------|-----------|-----------|
| C | -2.436732 | 1.271618  | -0.021792 |
| C | -2.620800 | -0.135375 | 0.014501  |
| C | -1.430411 | -0.936083 | 0.104630  |
| C | -0.128368 | -0.390658 | 0.147272  |
| C | 0.000404  | 0.991164  | 0.121392  |
| C | -1.136456 | 1.851552  | 0.038102  |
| C | 1.078387  | -1.295996 | 0.194826  |
| C | 2.344196  | -0.530129 | -0.202238 |
| O | 1.203394  | 1.612862  | 0.160358  |
| C | 3.635426  | -1.318958 | 0.063197  |
| C | 4.894342  | -0.491659 | -0.101324 |
| C | 4.841200  | 0.848998  | -0.154205 |
| C | 3.569805  | 1.656737  | -0.118189 |
| C | 6.226568  | -1.222358 | -0.196807 |
| H | 2.295848  | -0.315543 | -1.277274 |
| C | -0.997075 | 3.283972  | 0.036523  |
| C | 6.482005  | -2.143126 | 1.012664  |
| C | 6.358624  | -2.005272 | -1.519855 |
| C | -3.926781 | -0.818883 | -0.033272 |
| O | -3.957126 | -2.070062 | 0.006766  |
| O | -3.489603 | 2.083999  | -0.103404 |
| O | -1.509355 | -2.261922 | 0.144931  |
| O | -1.960383 | 4.075078  | -0.042234 |
| C | -5.230694 | -0.052039 | -0.129331 |
| C | -6.541260 | -0.866435 | -0.173871 |
| C | -6.671425 | -1.745031 | -1.429732 |
| C | -6.809920 | -1.661259 | 1.115385  |
| C | 2.405795  | 0.838220  | 0.488198  |
| C | 2.502741  | 0.785568  | 2.015707  |
| O | 3.290252  | 2.065881  | -1.461683 |
| H | 1.186930  | -1.732218 | 1.198096  |
| H | 0.924690  | -2.145086 | -0.479327 |
| H | 3.609938  | -1.740520 | 1.079242  |
| H | 3.665484  | -2.185567 | -0.608698 |
| H | 5.757159  | 1.421755  | -0.283537 |
| H | 3.720267  | 2.552823  | 0.504255  |
| H | 7.008374  | -0.451867 | -0.196121 |
| H | 0.019608  | 3.692150  | 0.114778  |

|   |           |           |           |
|---|-----------|-----------|-----------|
| H | 7.485766  | -2.577674 | 0.953146  |
| H | 6.409121  | -1.592759 | 1.957050  |
| H | 5.767982  | -2.973852 | 1.047265  |
| H | 7.360026  | -2.442145 | -1.602232 |
| H | 6.199916  | -1.351949 | -2.383607 |
| H | 5.637866  | -2.828653 | -1.579318 |
| H | -3.133112 | 3.030238  | -0.104552 |
| H | -2.499700 | -2.482164 | 0.097509  |
| H | -5.258493 | 0.653065  | 0.710620  |
| H | -5.164876 | 0.596639  | -1.011617 |
| H | -7.325949 | -0.098578 | -0.241843 |
| H | -7.678286 | -2.173573 | -1.491156 |
| H | -6.506157 | -1.159127 | -2.342093 |
| H | -5.952317 | -2.567865 | -1.417215 |
| H | -7.819147 | -2.088174 | 1.095419  |
| H | -6.742124 | -1.016262 | 1.999943  |
| H | -6.096809 | -2.480759 | 1.234602  |
| H | 1.662583  | 0.236774  | 2.449709  |
| H | 3.431365  | 0.304945  | 2.332989  |
| H | 2.489103  | 1.801478  | 2.421364  |
| H | 2.470080  | 2.580389  | -1.445955 |

**Conformer 12:**

|   |           |           |           |
|---|-----------|-----------|-----------|
| C | -2.442688 | 1.129083  | 0.073956  |
| C | -2.577242 | -0.279384 | 0.183712  |
| C | -1.360020 | -1.035415 | 0.292411  |
| C | -0.076205 | -0.448012 | 0.260536  |
| C | 0.005399  | 0.933527  | 0.151058  |
| C | -1.161506 | 1.752291  | 0.061021  |
| C | 1.161043  | -1.310169 | 0.322272  |
| C | 2.386570  | -0.530254 | -0.163521 |
| O | 1.187580  | 1.593984  | 0.113316  |
| C | 3.711688  | -1.260799 | 0.101710  |
| C | 4.935900  | -0.405740 | -0.156576 |
| C | 4.836185  | 0.927032  | -0.285984 |
| C | 3.540365  | 1.695071  | -0.252187 |
| C | 6.287503  | -1.099120 | -0.258205 |
| H | 2.295049  | -0.382094 | -1.246933 |
| C | -1.070687 | 3.186705  | -0.014231 |
| C | 6.611080  | -1.946090 | 0.988260  |
| C | 6.401883  | -1.947035 | -1.542319 |
| C | -3.858833 | -1.004448 | 0.193695  |
| O | -3.853862 | -2.248023 | 0.341326  |
| O | -3.525760 | 1.900913  | -0.003549 |
| O | -1.395838 | -2.357727 | 0.418731  |
| O | -2.062513 | 3.941239  | -0.096530 |
| C | -5.192965 | -0.300241 | 0.043311  |
| C | -6.412753 | -1.230619 | -0.071673 |
| C | -7.701333 | -0.428695 | 0.172053  |
| C | -6.463186 | -1.941757 | -1.433591 |
| C | 2.425722  | 0.878217  | 0.442645  |
| C | 2.576429  | 0.920715  | 1.966146  |
| O | 3.201840  | 2.013751  | -1.606564 |
| H | 1.316278  | -1.679867 | 1.345884  |
| H | 1.014704  | -2.203730 | -0.293530 |
| H | 3.734806  | -1.620715 | 1.141269  |
| H | 3.748006  | -2.165028 | -0.518308 |
| H | 5.727551  | 1.519490  | -0.481508 |
| H | 3.681574  | 2.631251  | 0.310549  |
| H | 7.043639  | -0.306187 | -0.324400 |
| H | -0.066346 | 3.630827  | 0.007927  |
| H | 7.625877  | -2.352405 | 0.917737  |
| H | 6.550651  | -1.348990 | 1.904727  |
| H | 5.925513  | -2.795080 | 1.089740  |
| H | 7.413043  | -2.358714 | -1.634743 |
| H | 6.196289  | -1.345256 | -2.433194 |
| H | 5.704913  | -2.792726 | -1.535078 |
| H | -3.203182 | 2.857129  | -0.063468 |
| H | -2.379463 | -2.610019 | 0.423165  |
| H | -5.297054 | 0.370248  | 0.907214  |
| H | -5.141968 | 0.379707  | -0.814993 |

|   |           |           |           |
|---|-----------|-----------|-----------|
| H | -6.330184 | -1.997414 | 0.707863  |
| H | -8.582126 | -1.076754 | 0.104712  |
| H | -7.704136 | 0.038223  | 1.163802  |
| H | -7.819315 | 0.368898  | -0.572508 |
| H | -7.330367 | -2.609263 | -1.490705 |
| H | -5.566812 | -2.543753 | -1.605246 |
| H | -6.552491 | -1.213003 | -2.249990 |
| H | 1.770849  | 0.372655  | 2.462228  |
| H | 3.531272  | 0.490169  | 2.277526  |
| H | 2.542152  | 1.958310  | 2.311176  |
| H | 2.365614  | 2.501800  | -1.591747 |

**Conformer 18:**

|   |           |           |           |
|---|-----------|-----------|-----------|
| C | -2.446481 | 1.273041  | 0.043625  |
| C | -2.669373 | -0.128300 | 0.006370  |
| C | -1.500775 | -0.964858 | 0.035590  |
| C | -0.183462 | -0.458258 | 0.087731  |
| C | -0.016375 | 0.918950  | 0.133948  |
| C | -1.129763 | 1.813232  | 0.114917  |
| C | 0.997885  | -1.397470 | 0.068378  |
| C | 2.278583  | -0.646069 | -0.308020 |
| O | 1.203894  | 1.504852  | 0.186970  |
| C | 3.551858  | -1.478821 | -0.100237 |
| C | 4.834090  | -0.682174 | -0.252210 |
| C | 4.815200  | 0.660470  | -0.245218 |
| C | 3.565817  | 1.496556  | -0.133012 |
| C | 6.110357  | -1.501409 | -0.404380 |
| H | 2.221407  | -0.374724 | -1.369694 |
| C | -0.950396 | 3.239261  | 0.188874  |
| C | 7.345157  | -0.692186 | -0.823291 |
| C | 6.413715  | -2.313295 | 0.875419  |
| C | -3.994484 | -0.772317 | -0.059652 |
| O | -4.059467 | -2.022545 | -0.085247 |
| O | -3.477235 | 2.117006  | 0.022421  |
| O | -1.616305 | -2.288300 | 0.005907  |
| O | -1.892170 | 4.059407  | 0.167961  |
| C | -5.277373 | 0.033969  | -0.098243 |
| C | -6.610559 | -0.740547 | -0.172338 |
| C | -6.777237 | -1.545589 | -1.472431 |
| C | -6.889190 | -1.596743 | 1.074825  |
| C | 2.389256  | 0.681220  | 0.451509  |
| C | 2.510602  | 0.546658  | 1.972324  |
| O | 3.272555  | 1.989452  | -1.445154 |
| H | 1.108690  | -1.888907 | 1.045532  |
| H | 0.810730  | -2.205173 | -0.646877 |
| H | 3.524489  | -1.948573 | 0.893968  |
| H | 3.555933  | -2.312684 | -0.815208 |
| H | 5.730867  | 1.226899  | -0.381282 |
| H | 3.756296  | 2.351447  | 0.535009  |
| H | 5.909547  | -2.229790 | -1.205857 |
| H | 0.078286  | 3.614800  | 0.273603  |
| H | 8.188792  | -1.366699 | -1.002900 |
| H | 7.165504  | -0.125161 | -1.742022 |
| H | 7.650774  | 0.012353  | -0.041093 |
| H | 7.300816  | -2.938656 | 0.728266  |
| H | 5.587640  | -2.974596 | 1.153846  |
| H | 6.610965  | -1.641624 | 1.719214  |
| H | -3.094484 | 3.051856  | 0.067105  |
| H | -2.612966 | -2.478699 | -0.038169 |
| H | -5.276934 | 0.692010  | 0.779533  |
| H | -5.202395 | 0.728423  | -0.944177 |
| H | -7.374044 | 0.051126  | -0.189989 |
| H | -7.796537 | -1.941523 | -1.546280 |
| H | -6.603382 | -0.915897 | -2.353488 |
| H | -6.082091 | -2.387941 | -1.512052 |
| H | -7.910094 | -1.994140 | 1.042752  |
| H | -6.795097 | -1.002953 | 1.992221  |
| H | -6.198159 | -2.440737 | 1.141710  |
| H | 1.665286  | -0.004795 | 2.392784  |
| H | 3.433029  | 0.029727  | 2.247863  |
| H | 2.527548  | 1.540335  | 2.429630  |

H 2.467100 2.523391 -1.383674

**Conformer 20:**

C 2.446756 1.128073 0.023494  
C 2.623023 -0.275124 0.141152  
C 1.429697 -1.075813 0.138910  
C 0.131444 -0.533714 0.016696  
C 0.010299 0.842851 -0.117110  
C 1.150595 1.703032 -0.116061  
C -1.079817 -1.433067 0.060905  
C -2.344716 -0.621043 0.355409  
O -1.188606 1.461306 -0.240164  
C -3.638524 -1.425401 0.163370  
C -4.897775 -0.581825 0.231508  
C -4.835228 0.756618 0.143266  
C -3.557014 1.545395 0.014489  
C -6.203358 -1.350267 0.398842  
H -2.306152 -0.286563 1.399766  
C 1.019253 3.127926 -0.270403  
C -7.421858 -0.478607 0.731194  
C -6.499352 -2.232282 -0.835479  
C 3.924521 -0.952630 0.265925  
O 3.952660 -2.197044 0.403354  
O 3.503513 1.939119 0.037876  
O 1.503433 -2.397050 0.260277  
O 1.985980 3.918624 -0.263246  
C 5.239229 -0.197922 0.249169  
C 6.499111 -1.080707 0.256985  
C 6.714405 -1.782616 -1.093594  
C 7.724837 -0.231766 0.630973  
C -2.392906 0.659736 -0.486558  
C -2.479661 0.434962 -1.999016  
O -3.281616 2.109456 1.301595  
H -1.181560 -1.980321 -0.887124  
H -0.937051 -2.200297 0.828997  
H -3.600874 -1.955858 -0.799470  
H -3.687969 -2.213295 0.927112  
H -5.735225 1.358293 0.219585  
H -3.702668 2.362696 -0.709508  
H -6.047200 -2.031969 1.249809  
H 0.006135 3.529793 -0.406660  
H -8.291251 -1.114151 0.929126  
H -7.247996 0.140045 1.617134  
H -7.683991 0.183665 -0.102053  
H -7.410379 -2.818667 -0.674709  
H -5.688671 -2.935776 -1.047927  
H -6.651635 -1.609988 -1.725201  
H 3.153716 2.881633 -0.068377  
H 2.491344 -2.612988 0.353083  
H 5.247881 0.482253 -0.610481  
H 5.231117 0.473557 1.118476  
H 6.367633 -1.854068 1.023225  
H 7.608343 -2.415716 -1.063497  
H 5.864078 -2.418017 -1.355389  
H 6.857143 -1.046857 -1.896034  
H 8.632010 -0.845681 0.652412  
H 7.609426 0.229832 1.618470  
H 7.887031 0.573504 -0.096826  
H -1.641747 -0.166444 -2.361833  
H -3.410601 -0.070361 -2.267332  
H -2.453794 1.398429 -2.516580  
H -2.457756 2.613183 1.229886

**Conformer 22:**

C 2.446756 1.128073 0.023494  
C 2.623023 -0.275124 0.141152  
C 1.429697 -1.075813 0.138910  
C 0.131444 -0.533714 0.016696  
C 0.010299 0.842851 -0.117110  
C 1.150595 1.703032 -0.116061  
C -1.079817 -1.433067 0.060905

|   |           |           |           |
|---|-----------|-----------|-----------|
| C | -2.344716 | -0.621043 | 0.355409  |
| O | -1.188606 | 1.461306  | -0.240164 |
| C | -3.638524 | -1.425401 | 0.163370  |
| C | -4.897775 | -0.581825 | 0.231508  |
| C | -4.835228 | 0.756618  | 0.143266  |
| C | -3.557014 | 1.545395  | 0.014489  |
| C | -6.203358 | -1.350267 | 0.398842  |
| H | -2.306152 | -0.286563 | 1.399766  |
| C | 1.019253  | 3.127926  | -0.270403 |
| C | -7.421858 | -0.478607 | 0.731194  |
| C | -6.499352 | -2.232282 | -0.835479 |
| C | 3.924521  | -0.952630 | 0.265925  |
| O | 3.952660  | -2.197044 | 0.403354  |
| O | 3.503513  | 1.939119  | 0.037876  |
| O | 1.503433  | -2.397050 | 0.260277  |
| O | 1.985980  | 3.918624  | -0.263246 |
| C | 5.239229  | -0.197922 | 0.249169  |
| C | 6.499111  | -1.080707 | 0.256985  |
| C | 6.714405  | -1.782616 | -1.093594 |
| C | 7.724837  | -0.231766 | 0.630973  |
| C | -2.392906 | 0.659736  | -0.486558 |
| C | -2.479661 | 0.434962  | -1.999016 |
| O | -3.281616 | 2.109456  | 1.301595  |
| H | -1.181560 | -1.980321 | -0.887124 |
| H | -0.937051 | -2.200297 | 0.828997  |
| H | -3.600874 | -1.955858 | -0.799470 |
| H | -3.687969 | -2.213295 | 0.927112  |
| H | -5.735225 | 1.358293  | 0.219585  |
| H | -3.702668 | 2.362696  | -0.709508 |
| H | -6.047200 | -2.031969 | 1.249809  |
| H | 0.006135  | 3.529793  | -0.406660 |
| H | -8.291251 | -1.114151 | 0.929126  |
| H | -7.247996 | 0.140045  | 1.617134  |
| H | -7.683991 | 0.183665  | -0.102053 |
| H | -7.410379 | -2.818667 | -0.674709 |
| H | -5.688671 | -2.935776 | -1.047927 |
| H | -6.651635 | -1.609988 | -1.725201 |
| H | 3.153716  | 2.881633  | -0.068377 |
| H | 2.491344  | -2.612988 | 0.353083  |
| H | 5.247881  | 0.482253  | -0.610481 |
| H | 5.231117  | 0.473557  | 1.118476  |
| H | 6.367633  | -1.854068 | 1.023225  |
| H | 7.608343  | -2.415716 | -1.063497 |
| H | 5.864078  | -2.418017 | -1.355389 |
| H | 6.857143  | -1.046857 | -1.896034 |
| H | 8.632010  | -0.845681 | 0.652412  |
| H | 7.609426  | 0.229832  | 1.618470  |
| H | 7.887031  | 0.573504  | -0.096826 |
| H | -1.641747 | -0.166444 | -2.361833 |
| H | -3.410601 | -0.070361 | -2.267332 |
| H | -2.453794 | 1.398429  | -2.516580 |
| H | -2.457756 | 2.613183  | 1.229886  |

**Conformer 23:**

|   |           |           |           |
|---|-----------|-----------|-----------|
| C | 2.434246  | 1.122945  | 0.075204  |
| C | 2.571110  | -0.288953 | 0.116794  |
| C | 1.357247  | -1.055203 | 0.049372  |
| C | 0.076205  | -0.471645 | -0.062821 |
| C | -0.006066 | 0.913054  | -0.120611 |
| C | 1.156446  | 1.740161  | -0.052992 |
| C | -1.159368 | -1.338078 | -0.088063 |
| C | -2.406452 | -0.509175 | 0.233948  |
| O | -1.185791 | 1.570098  | -0.227632 |
| C | -3.718027 | -1.269447 | -0.014430 |
| C | -4.951115 | -0.392899 | 0.073417  |
| C | -4.853387 | 0.946048  | 0.048440  |
| C | -3.554709 | 1.708010  | -0.005982 |
| C | -6.308988 | -1.072563 | 0.183467  |
| H | -2.373469 | -0.232908 | 1.295404  |
| C | 1.065635  | 3.174472  | -0.129388 |
| C | -6.569156 | -2.061031 | -0.970208 |

|   |           |           |           |
|---|-----------|-----------|-----------|
| C | -6.495242 | -1.763607 | 1.550489  |
| C | 3.851695  | -1.007827 | 0.225852  |
| O | 3.844406  | -2.258349 | 0.292041  |
| O | 3.511684  | 1.902611  | 0.152149  |
| O | 1.393770  | -2.382719 | 0.096589  |
| O | 2.052702  | 3.936735  | -0.062222 |
| C | 5.185802  | -0.289547 | 0.276744  |
| C | 6.421645  | -1.205528 | 0.259986  |
| C | 6.647245  | -1.836907 | -1.123322 |
| C | 7.660980  | -0.412735 | 0.705463  |
| C | -2.406979 | 0.817135  | -0.536667 |
| C | -2.473825 | 0.677536  | -2.060340 |
| O | -3.289448 | 2.186628  | 1.317293  |
| H | -1.260651 | -1.827734 | -1.067143 |
| H | -1.049816 | -2.151213 | 0.637071  |
| H | -3.686069 | -1.750553 | -1.003498 |
| H | -3.791567 | -2.093643 | 0.705745  |
| H | -5.751722 | 1.555243  | 0.123481  |
| H | -3.661425 | 2.570069  | -0.683105 |
| H | -7.064278 | -0.278987 | 0.115233  |
| H | 0.066107  | 3.610919  | -0.259450 |
| H | -7.588051 | -2.458180 | -0.906814 |
| H | -6.457334 | -1.575800 | -1.945981 |
| H | -5.882956 | -2.914827 | -0.934413 |
| H | -7.511593 | -2.163707 | 1.636570  |
| H | -6.334922 | -1.060692 | 2.374063  |
| H | -5.802383 | -2.602743 | 1.680018  |
| H | 3.188887  | 2.858893  | 0.093149  |
| H | 2.373783  | -2.630587 | 0.193007  |
| H | 5.230226  | 0.436421  | -0.543467 |
| H | 5.177054  | 0.333092  | 1.181661  |
| H | 6.253503  | -2.016426 | 0.978803  |
| H | 7.523230  | -2.495198 | -1.110987 |
| H | 5.786168  | -2.432960 | -1.437305 |
| H | 6.826659  | -1.061877 | -1.880126 |
| H | 8.550998  | -1.051610 | 0.710487  |
| H | 7.536614  | -0.003812 | 1.714853  |
| H | 7.860004  | 0.427062  | 0.027516  |
| H | -1.643902 | 0.077023  | -2.442471 |
| H | -3.411457 | 0.209665  | -2.370124 |
| H | -2.417303 | 1.666775  | -2.524055 |
| H | -2.452559 | 2.672947  | 1.290050  |

**Conformer 24:**

|   |           |           |           |
|---|-----------|-----------|-----------|
| C | 2.582710  | 0.886365  | -0.304830 |
| C | 2.675651  | -0.519442 | -0.484185 |
| C | 1.433322  | -1.239641 | -0.570277 |
| C | 0.167813  | -0.621144 | -0.466048 |
| C | 0.127973  | 0.756295  | -0.300186 |
| C | 1.319712  | 1.540266  | -0.219855 |
| C | -1.093661 | -1.448520 | -0.513073 |
| C | -2.277678 | -0.655999 | 0.048945  |
| O | -1.033107 | 1.445329  | -0.192065 |
| C | -3.632911 | -1.336183 | -0.189031 |
| C | -4.826393 | -0.459815 | 0.133803  |
| C | -4.688204 | 0.864414  | 0.304153  |
| C | -3.368469 | 1.591946  | 0.261705  |
| C | -6.161892 | -1.186525 | 0.238967  |
| H | -2.140286 | -0.551111 | 1.132589  |
| C | 1.269695  | 2.971332  | -0.076944 |
| C | -6.295435 | -1.883881 | 1.612066  |
| C | -7.390991 | -0.306740 | -0.032521 |
| C | 3.931685  | -1.274997 | -0.607188 |
| O | 3.882785  | -2.514732 | -0.795221 |
| O | 3.685565  | 1.628556  | -0.220261 |
| O | 1.429377  | -2.554869 | -0.749256 |
| O | 2.283589  | 3.696633  | 0.003983  |
| C | 5.303962  | -0.650302 | -0.500297 |
| C | 5.767024  | -0.403885 | 0.963871  |
| C | 5.906654  | -1.713586 | 1.753679  |
| C | 7.088269  | 0.379033  | 0.953878  |



|   |           |           |           |
|---|-----------|-----------|-----------|
| C | -2.301343 | 0.774702  | -0.502768 |
| C | -2.503752 | 0.879257  | -2.017294 |
| O | -2.977669 | 1.841159  | 1.616842  |
| H | -1.297185 | -1.774093 | -1.543155 |
| H | -0.948497 | -2.368748 | 0.062413  |
| H | -3.711709 | -1.662224 | -1.238371 |
| H | -3.678375 | -2.259537 | 0.402297  |
| H | -5.548984 | 1.484220  | 0.536328  |
| H | -3.497082 | 2.555787  | -0.255387 |
| H | -6.148067 | -1.977724 | -0.526583 |
| H | 0.277524  | 3.441087  | -0.043561 |
| H | -7.208105 | -2.488961 | 1.647265  |
| H | -5.449905 | -2.546154 | 1.823354  |
| H | -6.347109 | -1.139578 | 2.414168  |
| H | -8.297186 | -0.921569 | -0.043696 |
| H | -7.315458 | 0.205283  | -0.997311 |
| H | -7.524407 | 0.452882  | 0.745693  |
| H | 3.387734  | 2.589481  | -0.112201 |
| H | 2.408921  | -2.830020 | -0.807322 |
| H | 5.992097  | -1.356325 | -0.977142 |
| H | 5.329981  | 0.296509  | -1.042396 |
| H | 5.012210  | 0.222079  | 1.454472  |
| H | 6.217859  | -1.506613 | 2.783736  |
| H | 4.968242  | -2.275336 | 1.793508  |
| H | 6.661453  | -2.367271 | 1.299834  |
| H | 7.430248  | 0.577637  | 1.975738  |
| H | 6.977159  | 1.340958  | 0.442159  |
| H | 7.876914  | -0.188006 | 0.443345  |
| H | -1.728344 | 0.333724  | -2.561836 |
| H | -3.478233 | 0.481513  | -2.311000 |
| H | -2.457849 | 1.928428  | -2.323884 |
| H | -2.130321 | 2.309378  | 1.595357  |

**Conformer 26:**

|   |           |           |           |
|---|-----------|-----------|-----------|
| C | -2.442651 | 1.128899  | 0.073442  |
| C | -2.577183 | -0.279566 | 0.183178  |
| C | -1.359963 | -1.035536 | 0.292066  |
| C | -0.076171 | -0.448114 | 0.260486  |
| C | 0.005445  | 0.933469  | 0.151265  |
| C | -1.161487 | 1.752170  | 0.060907  |
| C | 1.161101  | -1.310241 | 0.322308  |
| C | 2.386590  | -0.530205 | -0.163372 |
| O | 1.187568  | 1.593993  | 0.114139  |
| C | 3.711751  | -1.260775 | 0.101644  |
| C | 4.935939  | -0.405642 | -0.156537 |
| C | 4.836201  | 0.927151  | -0.285720 |
| C | 3.540356  | 1.695128  | -0.251767 |
| C | 6.287542  | -1.098995 | -0.258345 |
| H | 2.295003  | -0.381863 | -1.246755 |
| C | -1.070749 | 3.186591  | -0.014358 |
| C | 6.611170  | -1.946225 | 0.987931  |
| C | 6.401882  | -1.946634 | -1.542643 |
| C | -3.858829 | -1.004553 | 0.193205  |
| O | -3.853960 | -2.248146 | 0.340509  |
| O | -3.525695 | 1.900685  | -0.004439 |
| O | -1.395720 | -2.357911 | 0.418270  |
| O | -2.062580 | 3.941099  | -0.096963 |
| C | -5.192884 | -0.300116 | 0.043167  |
| C | -6.412876 | -1.230300 | -0.071116 |
| C | -7.701235 | -0.428150 | 0.173019  |
| C | -6.464001 | -1.941687 | -1.432881 |
| C | 2.425801  | 0.878126  | 0.443056  |
| C | 2.576679  | 0.920330  | 1.966554  |
| O | 3.201758  | 2.013916  | -1.606097 |
| H | 1.316277  | -1.680028 | 1.345891  |
| H | 1.014846  | -2.203746 | -0.293599 |
| H | 3.734936  | -1.620876 | 1.141136  |
| H | 3.748044  | -2.164875 | -0.518558 |
| H | 5.727555  | 1.519652  | -0.481174 |
| H | 3.681555  | 2.631248  | 0.311071  |
| H | 7.043677  | -0.306046 | -0.324397 |

|   |           |           |           |
|---|-----------|-----------|-----------|
| H | -0.066448 | 3.630782  | 0.008150  |
| H | 7.625976  | -2.352497 | 0.917288  |
| H | 6.550755  | -1.349321 | 1.904527  |
| H | 5.925629  | -2.795256 | 1.089251  |
| H | 7.413032  | -2.358319 | -1.635175 |
| H | 6.196288  | -1.344657 | -2.433386 |
| H | 5.704891  | -2.792310 | -1.535579 |
| H | -3.202957 | 2.856922  | -0.064182 |
| H | -2.379193 | -2.610365 | 0.422601  |
| H | -5.296491 | 0.370647  | 0.906921  |
| H | -5.142034 | 0.379571  | -0.815361 |
| H | -6.330097 | -1.996976 | 0.708520  |
| H | -8.582159 | -1.076086 | 0.106170  |
| H | -7.703548 | 0.038944  | 1.164689  |
| H | -7.819425 | 0.369335  | -0.571626 |
| H | -7.331304 | -2.609079 | -1.489506 |
| H | -5.567789 | -2.543852 | -1.604800 |
| H | -6.553534 | -1.213060 | -2.249367 |
| H | 1.771166  | 0.372148  | 2.462609  |
| H | 3.531573  | 0.489768  | 2.277755  |
| H | 2.542387  | 1.957863  | 2.311767  |
| H | 2.365853  | 2.502497  | -1.591172 |

**Conformer 28:**

|   |           |           |           |
|---|-----------|-----------|-----------|
| C | -2.439262 | 1.274203  | -0.065107 |
| C | -2.666933 | -0.123738 | 0.028720  |
| C | -1.502999 | -0.955265 | 0.170545  |
| C | -0.185309 | -0.448255 | 0.206308  |
| C | -0.013588 | 0.926629  | 0.121135  |
| C | -1.122510 | 1.816539  | -0.013152 |
| C | 0.992361  | -1.386975 | 0.307813  |
| C | 2.283745  | -0.677290 | -0.109979 |
| O | 1.207448  | 1.512918  | 0.146936  |
| C | 3.550182  | -1.487595 | 0.198777  |
| C | 4.837676  | -0.707340 | 0.025427  |
| C | 4.828567  | 0.630752  | -0.079703 |
| C | 3.577192  | 1.471207  | -0.104065 |
| C | 6.110141  | -1.545297 | -0.011426 |
| H | 2.249686  | -0.507099 | -1.193503 |
| C | -0.939075 | 3.242679  | -0.074037 |
| C | 6.301935  | -2.182620 | -1.406610 |
| C | 7.381891  | -0.794555 | 0.409857  |
| C | -3.992449 | -0.769162 | -0.010382 |
| O | -4.062009 | -2.015675 | 0.086238  |
| O | -3.465626 | 2.113815  | -0.194441 |
| O | -1.623299 | -2.275026 | 0.268222  |
| O | -1.876670 | 4.058467  | -0.198581 |
| C | -5.270292 | 0.031142  | -0.165849 |
| C | -6.603759 | -0.745437 | -0.205511 |
| C | -6.733381 | -1.672992 | -1.425712 |
| C | -6.924351 | -1.475880 | 1.109694  |
| C | 2.381612  | 0.716645  | 0.522330  |
| C | 2.460066  | 0.727026  | 2.051830  |
| O | 3.328281  | 1.821651  | -1.470228 |
| H | 1.078464  | -1.780490 | 1.330687  |
| H | 0.819072  | -2.260539 | -0.329285 |
| H | 3.509682  | -1.871341 | 1.230652  |
| H | 3.567525  | -2.380707 | -0.438734 |
| H | 5.756106  | 1.181219  | -0.204827 |
| H | 3.742552  | 2.392613  | 0.476097  |
| H | 5.962352  | -2.369197 | 0.703845  |
| H | 0.088727  | 3.622882  | -0.000437 |
| H | 7.158939  | -2.865155 | -1.401487 |
| H | 5.424188  | -2.754458 | -1.723980 |
| H | 6.486531  | -1.407048 | -2.157900 |
| H | 8.227822  | -1.488285 | 0.459632  |
| H | 7.267238  | -0.326904 | 1.393150  |
| H | 7.646593  | -0.011865 | -0.309718 |
| H | -3.080182 | 3.048009  | -0.231224 |
| H | -2.619159 | -2.467293 | 0.217088  |
| H | -5.293758 | 0.770949  | 0.643891  |

|   |           |           |           |
|---|-----------|-----------|-----------|
| H | -5.166979 | 0.640513  | -1.072190 |
| H | -7.363088 | 0.041575  | -0.323822 |
| H | -7.751184 | -2.074084 | -1.491932 |
| H | -6.530814 | -1.131982 | -2.358065 |
| H | -6.040003 | -2.515317 | -1.361893 |
| H | -7.945553 | -1.873052 | 1.084722  |
| H | -6.855914 | -0.795805 | 1.967523  |
| H | -6.239448 | -2.310323 | 1.279788  |
| H | 1.595448  | 0.228820  | 2.498623  |
| H | 3.366704  | 0.227052  | 2.401225  |
| H | 2.479607  | 1.759457  | 2.413194  |
| H | 2.525082  | 2.362127  | -1.491701 |

**Conformer 29:**

|   |           |           |           |
|---|-----------|-----------|-----------|
| C | 2.438513  | 1.121894  | 0.118243  |
| C | 2.619576  | -0.285597 | 0.109673  |
| C | 1.431105  | -1.086481 | 0.003658  |
| C | 0.133224  | -0.539649 | -0.100007 |
| C | 0.007967  | 0.843115  | -0.110011 |
| C | 1.143101  | 1.703095  | -0.000620 |
| C | -1.074072 | -1.443196 | -0.167551 |
| C | -2.349669 | -0.663674 | 0.166136  |
| O | -1.190791 | 1.466529  | -0.207074 |
| C | -3.635822 | -1.450369 | -0.121532 |
| C | -4.898925 | -0.617374 | -0.036823 |
| C | -4.845290 | 0.723719  | -0.022321 |
| C | -3.566114 | 1.521579  | -0.020402 |
| C | -6.200691 | -1.407753 | 0.021961  |
| H | -2.336692 | -0.421045 | 1.236223  |
| C | 1.007564  | 3.135719  | -0.025670 |
| C | -6.449288 | -1.941303 | 1.451304  |
| C | -7.434329 | -0.645368 | -0.483327 |
| C | 3.921455  | -0.967438 | 0.202887  |
| O | 3.953349  | -2.219127 | 0.224520  |
| O | 3.490003  | 1.931519  | 0.234774  |
| O | 1.509193  | -2.413036 | 0.003837  |
| O | 1.969303  | 3.925565  | 0.079489  |
| C | 5.231835  | -0.209879 | 0.288891  |
| C | 6.496137  | -1.085181 | 0.244297  |
| C | 6.747513  | -1.655763 | -1.160820 |
| C | 7.707780  | -0.271302 | 0.726400  |
| C | -2.382293 | 0.686327  | -0.560939 |
| C | -2.421045 | 0.595174  | -2.089305 |
| O | -3.339784 | 1.956511  | 1.325246  |
| H | -1.149353 | -1.903921 | -1.162856 |
| H | -0.946668 | -2.275521 | 0.532495  |
| H | -3.583274 | -1.905342 | -1.123450 |
| H | -3.700651 | -2.296453 | 0.574400  |
| H | -5.755681 | 1.312227  | 0.039698  |
| H | -3.684266 | 2.405999  | -0.665973 |
| H | -6.064386 | -2.283163 | -0.631759 |
| H | -0.004084 | 3.545022  | -0.150079 |
| H | -7.329646 | -2.593210 | 1.469201  |
| H | -5.600498 | -2.519427 | 1.830089  |
| H | -6.624570 | -1.110333 | 2.143247  |
| H | -8.302694 | -1.312151 | -0.509250 |
| H | -7.278919 | -0.249959 | -1.492387 |
| H | -7.688986 | 0.192964  | 0.174543  |
| H | 3.137602  | 2.878689  | 0.207298  |
| H | 2.495755  | -2.633318 | 0.099998  |
| H | 5.257077  | 0.548099  | -0.502630 |
| H | 5.199126  | 0.376885  | 1.216955  |
| H | 6.350656  | -1.927833 | 0.930779  |
| H | 7.643721  | -2.286310 | -1.168793 |
| H | 5.907007  | -2.266010 | -1.502142 |
| H | 6.905726  | -0.847081 | -1.886506 |
| H | 8.617629  | -0.881447 | 0.711794  |
| H | 7.566258  | 0.094458  | 1.749994  |
| H | 7.882814  | 0.599765  | 0.082125  |
| H | -1.564038 | 0.037990  | -2.477190 |
| H | -3.336044 | 0.104279  | -2.429644 |

|   |           |          |           |
|---|-----------|----------|-----------|
| H | -2.393637 | 1.600640 | -2.519599 |
| H | -2.518867 | 2.470056 | 1.332371  |

**Conformer 33:**

|   |           |           |           |
|---|-----------|-----------|-----------|
| C | -2.447898 | 1.135403  | 0.031665  |
| C | -2.626901 | -0.262836 | 0.195365  |
| C | -1.434947 | -1.049983 | 0.352505  |
| C | -0.133444 | -0.503122 | 0.316777  |
| C | -0.008166 | 0.869887  | 0.152988  |
| C | -1.148236 | 1.718876  | 0.012912  |
| C | 1.075855  | -1.399091 | 0.431390  |
| C | 2.330562  | -0.675404 | -0.066465 |
| O | 1.193992  | 1.492677  | 0.106203  |
| C | 3.631077  | -1.428996 | 0.244293  |
| C | 4.887090  | -0.621477 | -0.014457 |
| C | 4.832262  | 0.707801  | -0.192432 |
| C | 3.554749  | 1.507844  | -0.220859 |
| C | 6.183698  | -1.421742 | -0.047527 |
| H | 2.257537  | -0.566776 | -1.155966 |
| C | -1.012607 | 3.145748  | -0.118117 |
| C | 6.351711  | -2.129975 | -1.411231 |
| C | 7.443562  | -0.610886 | 0.289621  |
| C | -3.930015 | -0.948232 | 0.214494  |
| O | -3.965097 | -2.184545 | 0.410997  |
| O | -3.505725 | 1.935628  | -0.092465 |
| O | -1.512943 | -2.364476 | 0.530791  |
| O | -1.979713 | 3.925777  | -0.244970 |
| C | -5.239844 | -0.210982 | 0.016264  |
| C | -6.485435 | -1.108485 | -0.082053 |
| C | -7.752655 | -0.260055 | 0.110827  |
| C | -6.537492 | -1.869831 | -1.416487 |
| C | 2.404037  | 0.753751  | 0.485156  |
| C | 2.530403  | 0.851783  | 2.008377  |
| O | 3.251797  | 1.774621  | -1.594942 |
| H | 1.205727  | -1.732096 | 1.470986  |
| H | 0.910931  | -2.311706 | -0.150853 |
| H | 3.635363  | -1.755220 | 1.296523  |
| H | 3.656687  | -2.355520 | -0.343274 |
| H | 5.737514  | 1.277928  | -0.378170 |
| H | 3.709153  | 2.464469  | 0.302561  |
| H | 6.084697  | -2.208477 | 0.716359  |
| H | 0.004456  | 3.560025  | -0.098905 |
| H | 7.229867  | -2.784939 | -1.397116 |
| H | 5.483173  | -2.744943 | -1.667411 |
| H | 6.487667  | -1.392426 | -2.209706 |
| H | 8.312189  | -1.275124 | 0.349694  |
| H | 7.344863  | -0.092410 | 1.248861  |
| H | 7.660730  | 0.137727  | -0.480361 |
| H | -3.153228 | 2.878541  | -0.185591 |
| H | -2.503769 | -2.586825 | 0.529848  |
| H | -5.336058 | 0.495308  | 0.852127  |
| H | -5.155824 | 0.433345  | -0.866549 |
| H | -6.437292 | -1.846745 | 0.727335  |
| H | -8.651479 | -0.883960 | 0.054471  |
| H | -7.755744 | 0.244540  | 1.083948  |
| H | -7.835891 | 0.511463  | -0.665246 |
| H | -7.423547 | -2.513010 | -1.461807 |
| H | -5.657335 | -2.504359 | -1.550913 |
| H | -6.592720 | -1.170786 | -2.261385 |
| H | 1.697791  | 0.351866  | 2.510623  |
| H | 3.464102  | 0.401505  | 2.354066  |
| H | 2.526500  | 1.902866  | 2.311826  |
| H | 2.431267  | 2.288311  | -1.618915 |

**Conformer 38:**

|   |           |           |           |
|---|-----------|-----------|-----------|
| C | -2.435918 | 1.121561  | -0.119798 |
| C | -2.623187 | -0.286329 | -0.109209 |
| C | -1.437725 | -1.091493 | 0.005328  |
| C | -0.142507 | -0.548420 | 0.128843  |
| C | -0.010601 | 0.836090  | 0.146321  |
| C | -1.140751 | 1.697880  | 0.008281  |

|   |           |           |           |
|---|-----------|-----------|-----------|
| C | 1.065353  | -1.449424 | 0.204673  |
| C | 2.333998  | -0.663787 | -0.143519 |
| O | 1.177879  | 1.457525  | 0.280019  |
| C | 3.625664  | -1.450667 | 0.116915  |
| C | 4.888792  | -0.618023 | 0.028959  |
| C | 4.836657  | 0.725733  | 0.051435  |
| C | 3.557781  | 1.528139  | 0.055328  |
| C | 6.188852  | -1.408672 | -0.060761 |
| H | 2.289231  | -0.425004 | -1.215666 |
| C | -0.991679 | 3.130583  | -0.011626 |
| C | 6.419815  | -1.919954 | -1.501142 |
| C | 7.430102  | -0.658319 | 0.443625  |
| C | -3.925038 | -0.962601 | -0.211962 |
| O | -3.962935 | -2.214914 | -0.239233 |
| O | -3.482049 | 1.935558  | -0.254819 |
| O | -1.520572 | -2.419380 | -0.000360 |
| O | -1.951981 | 3.921067  | -0.130786 |
| C | -5.232677 | -0.199660 | -0.299950 |
| C | -6.500446 | -1.069545 | -0.251014 |
| C | -6.751173 | -1.636262 | 1.155780  |
| C | -7.709979 | -0.251990 | -0.732222 |
| C | 2.372354  | 0.685221  | 0.589445  |
| C | 2.445270  | 0.570633  | 2.118142  |
| O | 3.303420  | 2.071552  | -1.247562 |
| H | 1.152341  | -1.898592 | 1.204221  |
| H | 0.939476  | -2.289848 | -0.486009 |
| H | 3.586130  | -1.911188 | 1.116485  |
| H | 3.682492  | -2.293460 | -0.583725 |
| H | 5.749952  | 1.312574  | 0.004620  |
| H | 3.662940  | 2.407609  | 0.701050  |
| H | 6.056935  | -2.294745 | 0.578970  |
| H | 0.025296  | 3.533307  | 0.078517  |
| H | 7.293527  | -2.579582 | -1.538466 |
| H | 5.562697  | -2.484007 | -1.882643 |
| H | 6.600733  | -1.079361 | -2.180578 |
| H | 8.296738  | -1.327632 | 0.447389  |
| H | 7.287680  | -0.281245 | 1.461432  |
| H | 7.680042  | 0.191322  | -0.201541 |
| H | -3.121109 | 2.881509  | -0.236118 |
| H | -2.507244 | -2.634524 | -0.105911 |
| H | -5.254602 | 0.561965  | 0.488055  |
| H | -5.198254 | 0.382834  | -1.230620 |
| H | -6.359758 | -1.914332 | -0.935876 |
| H | -7.650055 | -2.263070 | 1.167284  |
| H | -5.912209 | -2.249212 | 1.496100  |
| H | -6.904092 | -0.825440 | 1.880246  |
| H | -8.622367 | -0.858391 | -0.714548 |
| H | -7.568986 | 0.111270  | -1.756797 |
| H | -7.880113 | 0.621178  | -0.089449 |
| H | 1.596146  | 0.007454  | 2.514159  |
| H | 3.367523  | 0.079832  | 2.438858  |
| H | 2.420173  | 1.571407  | 2.559213  |
| H | 3.640888  | 1.451938  | -1.907949 |

**Conformer 43:**

|   |           |           |           |
|---|-----------|-----------|-----------|
| C | -2.567042 | 0.878220  | -0.297977 |
| C | -2.656180 | -0.530094 | -0.458604 |
| C | -1.420134 | -1.263471 | -0.395793 |
| C | -0.163785 | -0.652501 | -0.187778 |
| C | -0.129008 | 0.725232  | -0.023844 |
| C | -1.315012 | 1.520392  | -0.074359 |
| C | 1.097013  | -1.482063 | -0.176246 |
| C | 2.328734  | -0.594734 | -0.381036 |
| O | 1.023241  | 1.407046  | 0.180526  |
| C | 3.652814  | -1.329686 | -0.127037 |
| C | 4.863881  | -0.416124 | -0.104173 |
| C | 4.720410  | 0.914566  | 0.004297  |
| C | 3.394059  | 1.628118  | 0.069816  |
| C | 6.218473  | -1.107250 | -0.206466 |
| H | 2.332007  | -0.241162 | -1.419795 |
| C | -1.273128 | 2.945713  | 0.119489  |

|   |           |           |           |
|---|-----------|-----------|-----------|
| C | 7.403135  | -0.162690 | -0.450199 |
| C | 6.490958  | -1.996828 | 1.027860  |
| C | -3.899825 | -1.276100 | -0.704156 |
| O | -3.845550 | -2.520217 | -0.858787 |
| O | -3.664687 | 1.631552  | -0.342414 |
| O | -1.412623 | -2.582485 | -0.543998 |
| O | -2.281325 | 3.682058  | 0.076209  |
| C | -5.267490 | -0.635485 | -0.766876 |
| C | -5.892574 | -0.357916 | 0.630009  |
| C | -7.194529 | 0.437703  | 0.455179  |
| C | -6.137617 | -1.651473 | 1.420800  |
| C | 2.254754  | 0.668692  | 0.484541  |
| C | 2.264828  | 0.417746  | 1.995335  |
| O | 3.163398  | 2.202469  | -1.221544 |
| H | 1.174430  | -2.042669 | 0.766277  |
| H | 1.042564  | -2.239693 | -0.964920 |
| H | 3.589136  | -1.882330 | 0.821849  |
| H | 3.791550  | -2.096757 | -0.900884 |
| H | 5.587748  | 1.566788  | -0.006800 |
| H | 3.450076  | 2.437084  | 0.815334  |
| H | 6.151335  | -1.778806 | -1.076946 |
| H | -0.293497 | 3.399396  | 0.321258  |
| H | 8.317118  | -0.744899 | -0.607070 |
| H | 7.246843  | 0.463775  | -1.333925 |
| H | 7.578253  | 0.495494  | 0.408720  |
| H | 7.441385  | -2.528623 | 0.911468  |
| H | 5.710161  | -2.748223 | 1.179545  |
| H | 6.555737  | -1.385507 | 1.935682  |
| H | -3.371726 | 2.589559  | -0.200971 |
| H | -2.383014 | -2.849231 | -0.704906 |
| H | -5.219686 | 0.301471  | -1.324328 |
| H | -5.904890 | -1.343080 | -1.307642 |
| H | -5.191464 | 0.269381  | 1.193297  |
| H | -7.649094 | 0.657929  | 1.427534  |
| H | -7.014030 | 1.389115  | -0.056383 |
| H | -7.926069 | -0.130574 | -0.133074 |
| H | -6.561946 | -1.422501 | 2.404825  |
| H | -5.217017 | -2.222254 | 1.577189  |
| H | -6.843653 | -2.305489 | 0.894726  |
| H | 1.443345  | -0.237904 | 2.296511  |
| H | 3.206076  | -0.039155 | 2.310429  |
| H | 2.152520  | 1.367189  | 2.527079  |
| H | 2.309753  | 2.658494  | -1.190709 |

**Conformer 46:**

|   |           |           |           |
|---|-----------|-----------|-----------|
| C | -2.584791 | 0.844651  | 0.394149  |
| C | -2.671407 | -0.572604 | 0.426728  |
| C | -1.426501 | -1.293089 | 0.401081  |
| C | -0.164993 | -0.662159 | 0.327091  |
| C | -0.131077 | 0.725110  | 0.306896  |
| C | -1.325253 | 1.508716  | 0.343078  |
| C | 1.097903  | -1.485093 | 0.252079  |
| C | 2.266581  | -0.634269 | -0.254479 |
| O | 1.025946  | 1.426054  | 0.239990  |
| C | 3.627542  | -1.331727 | -0.116039 |
| C | 4.810149  | -0.424928 | -0.400583 |
| C | 4.659984  | 0.908710  | -0.444927 |
| C | 3.346544  | 1.626814  | -0.266480 |
| C | 6.145591  | -1.125596 | -0.621538 |
| H | 2.103184  | -0.419575 | -1.318096 |
| C | -1.280483 | 2.947042  | 0.350807  |
| C | 7.260379  | -0.223042 | -1.167127 |
| C | 6.622096  | -1.845829 | 0.660380  |
| C | -3.922716 | -1.341822 | 0.504799  |
| O | -3.867268 | -2.594217 | 0.560382  |
| O | -3.690246 | 1.587366  | 0.419282  |
| O | -1.416223 | -2.619831 | 0.439891  |
| O | -2.296798 | 3.673032  | 0.375290  |
| C | -5.298010 | -0.714736 | 0.502283  |
| C | -5.801796 | -0.318154 | -0.914707 |
| C | -5.961307 | -1.538526 | -1.833355 |

|   |           |           |           |
|---|-----------|-----------|-----------|
| C | -7.123423 | 0.453587  | -0.786743 |
| C | 2.303341  | 0.731701  | 0.441282  |
| C | 2.551534  | 0.680250  | 1.951653  |
| O | 2.908002  | 2.027908  | -1.569385 |
| H | 1.329246  | -1.916684 | 1.236336  |
| H | 0.937743  | -2.340104 | -0.413012 |
| H | 3.721385  | -1.755165 | 0.894767  |
| H | 3.659643  | -2.193848 | -0.795906 |
| H | 5.502678  | 1.552515  | -0.675555 |
| H | 3.502037  | 2.526167  | 0.350251  |
| H | 5.957646  | -1.905531 | -1.376279 |
| H | -0.290042 | 3.421522  | 0.339646  |
| H | 8.150070  | -0.822204 | -1.387136 |
| H | 6.957793  | 0.282193  | -2.089644 |
| H | 7.553439  | 0.541955  | -0.438759 |
| H | 7.552899  | -2.389993 | 0.467631  |
| H | 5.888274  | -2.569372 | 1.028108  |
| H | 6.814933  | -1.120693 | 1.459775  |
| H | -3.396364 | 2.555402  | 0.404959  |
| H | -2.393420 | -2.903605 | 0.496868  |
| H | -5.971874 | -1.469560 | 0.921255  |
| H | -5.309845 | 0.169956  | 1.141156  |
| H | -5.061651 | 0.359012  | -1.357354 |
| H | -6.300702 | -1.226165 | -2.827318 |
| H | -5.023728 | -2.089324 | -1.957180 |
| H | -6.702690 | -2.239129 | -1.430236 |
| H | -7.493894 | 0.756089  | -1.772552 |
| H | -6.999618 | 1.357366  | -0.180660 |
| H | -7.896732 | -0.167079 | -0.316738 |
| H | 1.798471  | 0.071485  | 2.459296  |
| H | 3.538259  | 0.266136  | 2.172664  |
| H | 2.505742  | 1.691250  | 2.367082  |
| H | 2.060473  | 2.484451  | -1.464940 |

**Conformer 54:**

|   |           |           |           |
|---|-----------|-----------|-----------|
| C | 2.554908  | 0.846331  | 0.372260  |
| C | 2.647816  | -0.570599 | 0.400396  |
| C | 1.418716  | -1.298580 | 0.230280  |
| C | 0.165180  | -0.674556 | 0.045478  |
| C | 0.126510  | 0.712574  | 0.014441  |
| C | 1.306005  | 1.502915  | 0.174495  |
| C | -1.090086 | -1.503120 | -0.080209 |
| C | -2.330241 | -0.642831 | 0.179710  |
| O | -1.023677 | 1.407338  | -0.155063 |
| C | -3.646493 | -1.352591 | -0.166311 |
| C | -4.858189 | -0.442495 | -0.153832 |
| C | -4.722216 | 0.892859  | -0.148577 |
| C | -3.397700 | 1.610392  | -0.088105 |
| C | -6.207814 | -1.150496 | -0.154743 |
| H | -2.356561 | -0.388181 | 1.246768  |
| C | 1.261184  | 2.940112  | 0.116731  |
| C | -6.561021 | -1.650480 | 1.264684  |
| C | -7.364712 | -0.319808 | -0.729179 |
| C | 3.887925  | -1.332666 | 0.612154  |
| O | 3.836831  | -2.586110 | 0.644109  |
| O | 3.646339  | 1.595467  | 0.520239  |
| O | 1.415091  | -2.625757 | 0.250237  |
| O | 2.263396  | 3.672120  | 0.259365  |
| C | 5.248730  | -0.696587 | 0.780683  |
| C | 5.917162  | -0.285236 | -0.562049 |
| C | 7.206719  | 0.495902  | -0.269455 |
| C | 6.197658  | -1.496934 | -1.463024 |
| C | -2.242678 | 0.697338  | -0.560706 |
| C | -2.211211 | 0.590029  | -2.088165 |
| O | -3.212731 | 2.045816  | 1.263673  |
| H | -1.141195 | -1.968791 | -1.074725 |
| H | -1.051434 | -2.334196 | 0.631690  |
| H | -3.571548 | -1.821998 | -1.160145 |
| H | -3.798642 | -2.184569 | 0.532959  |
| H | -5.596286 | 1.536974  | -0.138456 |
| H | -3.427873 | 2.492956  | -0.746194 |

|   |           |           |           |
|---|-----------|-----------|-----------|
| H | -6.093252 | -2.040401 | -0.792872 |
| H | 0.285002  | 3.407865  | -0.068909 |
| H | -7.479952 | -2.246658 | 1.243233  |
| H | -5.770071 | -2.275179 | 1.691638  |
| H | -6.719157 | -0.801980 | 1.939261  |
| H | -8.270123 | -0.932457 | -0.794130 |
| H | -7.134121 | 0.053695  | -1.732185 |
| H | -7.600329 | 0.540011  | -0.092282 |
| H | 3.351780  | 2.561717  | 0.462496  |
| H | 2.381981  | -2.903423 | 0.413757  |
| H | 5.176853  | 0.182862  | 1.422804  |
| H | 5.872664  | -1.450390 | 1.272498  |
| H | 5.230186  | 0.389587  | -1.086487 |
| H | 7.691287  | 0.809294  | -1.200904 |
| H | 7.002457  | 1.393761  | 0.323507  |
| H | 7.922793  | -0.122420 | 0.286463  |
| H | 6.652231  | -1.173800 | -2.406269 |
| H | 5.286948  | -2.054335 | -1.703130 |
| H | 6.891040  | -2.194744 | -0.977974 |
| H | -1.372243 | -0.023362 | -2.427703 |
| H | -3.136984 | 0.152146  | -2.469277 |
| H | -2.100517 | 1.586598  | -2.525742 |
| H | -2.363848 | 2.509597  | 1.308097  |

**Conformer 60:**

|   |           |           |           |
|---|-----------|-----------|-----------|
| C | 2.445107  | 1.127202  | 0.024609  |
| C | 2.626935  | -0.276826 | 0.138553  |
| C | 1.436179  | -1.082125 | 0.125581  |
| C | 0.140480  | -0.545032 | -0.017362 |
| C | 0.013041  | 0.832830  | -0.157203 |
| C | 1.149303  | 1.697083  | -0.124519 |
| C | -1.072122 | -1.441816 | 0.016274  |
| C | -2.328654 | -0.621808 | 0.327082  |
| O | -1.175936 | 1.446498  | -0.318438 |
| C | -3.628335 | -1.422822 | 0.164844  |
| C | -4.886061 | -0.577933 | 0.241048  |
| C | -4.825222 | 0.760320  | 0.115523  |
| C | -3.547431 | 1.552100  | -0.023310 |
| C | -6.189221 | -1.342761 | 0.442422  |
| H | -2.256059 | -0.292689 | 1.373519  |
| C | 1.005865  | 3.126574  | -0.230389 |
| C | -7.404112 | -0.466311 | 0.775608  |
| C | -6.501249 | -2.245157 | -0.773439 |
| C | 3.928242  | -0.948454 | 0.273754  |
| O | 3.961952  | -2.193095 | 0.415513  |
| O | 3.497153  | 1.943983  | 0.059964  |
| O | 1.514146  | -2.404412 | 0.251206  |
| O | 1.971699  | 3.918986  | -0.206458 |
| C | 5.240455  | -0.188360 | 0.261591  |
| C | 6.503498  | -1.066520 | 0.266689  |
| C | 6.720789  | -1.763953 | -1.085876 |
| C | 7.726508  | -0.214599 | 0.642702  |
| C | -2.383023 | 0.658292  | -0.519566 |
| C | -2.506835 | 0.411238  | -2.029137 |
| O | -3.242817 | 2.222658  | 1.207274  |
| H | -1.186697 | -1.975318 | -0.938024 |
| H | -0.931640 | -2.219970 | 0.773795  |
| H | -3.606863 | -1.957116 | -0.795958 |
| H | -3.667949 | -2.208116 | 0.931813  |
| H | -5.728149 | 1.360542  | 0.179583  |
| H | -3.681501 | 2.364098  | -0.747411 |
| H | -6.021108 | -2.011058 | 1.301731  |
| H | -0.011599 | 3.525489  | -0.331266 |
| H | -8.269603 | -1.099215 | 0.996852  |
| H | -7.221320 | 0.168814  | 1.648326  |
| H | -7.678906 | 0.180594  | -0.065389 |
| H | -7.410779 | -2.827158 | -0.590787 |
| H | -5.694166 | -2.953195 | -0.983581 |
| H | -6.663923 | -1.637864 | -1.671474 |
| H | 3.139245  | 2.886395  | -0.036043 |
| H | 2.501959  | -2.614778 | 0.354470  |



|   |           |           |           |
|---|-----------|-----------|-----------|
| H | 5.247691  | 0.496209  | -0.594507 |
| H | 5.229116  | 0.478698  | 1.134196  |
| H | 6.374836  | -1.842628 | 1.030618  |
| H | 7.616959  | -2.394134 | -1.058177 |
| H | 5.872327  | -2.401439 | -1.348753 |
| H | 6.860341  | -1.025492 | -1.886420 |
| H | 8.635948  | -0.825352 | 0.662050  |
| H | 7.609697  | 0.243793  | 1.631544  |
| H | 7.885540  | 0.593478  | -0.082696 |
| H | -1.679450 | -0.199079 | -2.400638 |
| H | -3.446291 | -0.089234 | -2.276562 |
| H | -2.481468 | 1.369244  | -2.556609 |
| H | -3.530576 | 1.662551  | 1.940426  |

**Conformer 62:**

|   |           |           |           |
|---|-----------|-----------|-----------|
| C | 2.579481  | 0.888427  | -0.304324 |
| C | 2.679108  | -0.517807 | -0.486416 |
| C | 1.439127  | -1.242033 | -0.582238 |
| C | 0.173688  | -0.625394 | -0.499912 |
| C | 0.125715  | 0.755015  | -0.340663 |
| C | 1.315206  | 1.538061  | -0.230010 |
| C | -1.088610 | -1.449722 | -0.555494 |
| C | -2.263583 | -0.654257 | 0.022558  |
| O | -1.029384 | 1.445590  | -0.271769 |
| C | -3.621414 | -1.338771 | -0.185255 |
| C | -4.814557 | -0.463901 | 0.142952  |
| C | -4.682043 | 0.867792  | 0.277105  |
| C | -3.363566 | 1.601537  | 0.226535  |
| C | -6.144440 | -1.195702 | 0.281282  |
| H | -2.092680 | -0.554836 | 1.103968  |
| C | 1.255802  | 2.964669  | -0.040597 |
| C | -6.254373 | -1.873488 | 1.666211  |
| C | -7.382915 | -0.328343 | 0.012875  |
| C | 3.936726  | -1.268543 | -0.598400 |
| O | 3.895242  | -2.510523 | -0.779682 |
| O | 3.678816  | 1.633537  | -0.199237 |
| O | 1.441359  | -2.559612 | -0.755336 |
| O | 2.269355  | 3.689547  | 0.055682  |
| C | 5.306357  | -0.637316 | -0.490340 |
| C | 5.769041  | -0.393254 | 0.974151  |
| C | 5.917829  | -1.704570 | 1.759593  |
| C | 7.085156  | 0.398296  | 0.966362  |
| C | -2.295548 | 0.776408  | -0.534592 |
| C | -2.536051 | 0.859190  | -2.048082 |
| O | -2.939976 | 1.962959  | 1.548501  |
| H | -1.303988 | -1.761395 | -1.587389 |
| H | -0.945754 | -2.377338 | 0.008684  |
| H | -3.715013 | -1.670417 | -1.231218 |
| H | -3.656425 | -2.259671 | 0.410616  |
| H | -5.547343 | 1.487429  | 0.496131  |
| H | -3.481467 | 2.559604  | -0.292783 |
| H | -6.135380 | -1.998944 | -0.471359 |
| H | 0.261333  | 3.423969  | 0.025611  |
| H | -7.158811 | -2.488983 | 1.721172  |
| H | -5.398886 | -2.522645 | 1.878582  |
| H | -6.310161 | -1.117934 | 2.458036  |
| H | -8.284884 | -0.949103 | 0.025243  |
| H | -7.324933 | 0.167175  | -0.961547 |
| H | -7.510910 | 0.443895  | 0.779598  |
| H | 3.372820  | 2.592562  | -0.081621 |
| H | 2.422889  | -2.830318 | -0.801971 |
| H | 5.997880  | -1.338455 | -0.969708 |
| H | 5.327599  | 0.311504  | -1.029057 |
| H | 5.010444  | 0.226193  | 1.467088  |
| H | 6.226800  | -1.498816 | 2.790651  |
| H | 4.983541  | -2.273300 | 1.796247  |
| H | 6.677771  | -2.351126 | 1.303986  |
| H | 7.426798  | 0.595158  | 1.988734  |
| H | 6.967054  | 1.361490  | 0.458634  |
| H | 7.877120  | -0.161470 | 0.452796  |
| H | -1.770277 | 0.309537  | -2.601713 |

|   |           |          |           |
|---|-----------|----------|-----------|
| H | -3.515917 | 0.458909 | -2.320046 |
| H | -2.494876 | 1.905187 | -2.365756 |
| H | -3.244454 | 1.282386 | 2.163332  |

**Conformer 64:**

|   |           |           |           |
|---|-----------|-----------|-----------|
| C | 2.431648  | 1.122590  | 0.077976  |
| C | 2.574672  | -0.290011 | 0.115477  |
| C | 1.363655  | -1.060920 | 0.038041  |
| C | 0.085048  | -0.481615 | -0.093716 |
| C | -0.003840 | 0.904852  | -0.157088 |
| C | 1.153932  | 1.734846  | -0.058821 |
| C | -1.151194 | -1.345508 | -0.129207 |
| C | -2.390718 | -0.510578 | 0.208793  |
| O | -1.173653 | 1.558501  | -0.300889 |
| C | -3.707770 | -1.269492 | -0.012099 |
| C | -4.940225 | -0.392942 | 0.082246  |
| C | -4.844094 | 0.947746  | 0.022129  |
| C | -3.546008 | 1.714067  | -0.040347 |
| C | -6.296263 | -1.071581 | 0.220534  |
| H | -2.325534 | -0.240893 | 1.272554  |
| C | 1.049966  | 3.171361  | -0.087267 |
| C | -6.569303 | -2.072442 | -0.919725 |
| C | -6.465044 | -1.749971 | 1.596047  |
| C | 3.855381  | -1.003145 | 0.233031  |
| O | 3.854070  | -2.254438 | 0.302980  |
| O | 3.504019  | 1.907313  | 0.175017  |
| O | 1.405093  | -2.389700 | 0.089020  |
| O | 2.035739  | 3.934676  | -0.004383 |
| C | 5.186932  | -0.279513 | 0.287259  |
| C | 6.426360  | -1.190395 | 0.265062  |
| C | 6.651853  | -1.816021 | -1.120871 |
| C | 7.663580  | -0.394554 | 0.711005  |
| C | -2.397159 | 0.815853  | -0.565935 |
| C | -2.499922 | 0.655715  | -2.088752 |
| O | -3.248849 | 2.300048  | 1.234436  |
| H | -1.264038 | -1.821269 | -1.113784 |
| H | -1.043690 | -2.168513 | 0.585108  |
| H | -3.690385 | -1.753856 | -0.999560 |
| H | -3.772158 | -2.091764 | 0.711110  |
| H | -5.745431 | 1.555427  | 0.084650  |
| H | -3.641126 | 2.570617  | -0.717689 |
| H | -7.053300 | -0.279601 | 0.153198  |
| H | 0.045229  | 3.602712  | -0.182045 |
| H | -7.587643 | -2.467759 | -0.840387 |
| H | -6.468262 | -1.597615 | -1.901572 |
| H | -5.883170 | -2.926026 | -0.882246 |
| H | -7.477466 | -2.156362 | 1.695556  |
| H | -6.305360 | -1.038232 | 2.412680  |
| H | -5.764993 | -2.582492 | 1.728522  |
| H | 3.172657  | 2.862984  | 0.126458  |
| H | 2.385850  | -2.631835 | 0.194638  |
| H | 5.228516  | 0.451575  | -0.528442 |
| H | 5.176070  | 0.337669  | 1.195852  |
| H | 6.262664  | -2.004630 | 0.981131  |
| H | 7.530558  | -2.470864 | -1.112814 |
| H | 5.792310  | -2.414277 | -1.434926 |
| H | 6.826382  | -1.037602 | -1.875368 |
| H | 8.556210  | -1.029920 | 0.712124  |
| H | 7.539404  | 0.010445  | 1.722013  |
| H | 7.857967  | 0.448510  | 0.035746  |
| H | -1.679558 | 0.048140  | -2.479780 |
| H | -3.445490 | 0.190875  | -2.378774 |
| H | -2.444515 | 1.640398  | -2.562026 |
| H | -3.581962 | 1.712903  | 1.925999  |

**Conformer 71:**

|   |           |           |           |
|---|-----------|-----------|-----------|
| C | 2.440170  | 1.129208  | -0.072318 |
| C | 2.580523  | -0.279475 | -0.187379 |
| C | 1.365609  | -1.038665 | -0.307154 |
| C | 0.083122  | -0.453179 | -0.295254 |
| C | -0.005608 | 0.930662  | -0.189342 |

|   |           |           |           |
|---|-----------|-----------|-----------|
| C | 1.158562  | 1.748590  | -0.068037 |
| C | -1.155237 | -1.311677 | -0.367794 |
| C | -2.372058 | -0.528687 | 0.136266  |
| O | -1.180025 | 1.591915  | -0.188028 |
| C | -3.701243 | -1.261099 | -0.101009 |
| C | -4.924402 | -0.407465 | 0.166282  |
| C | -4.828348 | 0.931064  | 0.263218  |
| C | -3.533621 | 1.704574  | 0.222147  |
| C | -6.272355 | -1.103698 | 0.296102  |
| H | -2.247165 | -0.388819 | 1.219509  |
| C | 1.058069  | 3.180277  | 0.055938  |
| C | -6.609014 | -1.962832 | -0.938802 |
| C | -6.367344 | -1.941955 | 1.588031  |
| C | 3.862463  | -1.000209 | -0.187962 |
| O | 3.863622  | -2.245171 | -0.331558 |
| O | 3.519502  | 1.904140  | 0.026296  |
| O | 1.406357  | -2.362727 | -0.430536 |
| O | 2.049644  | 3.934159  | 0.154274  |
| C | 5.193996  | -0.290988 | -0.034023 |
| C | 6.417492  | -1.216574 | 0.079534  |
| C | 7.703069  | -0.409445 | -0.163027 |
| C | 6.471053  | -1.929495 | 1.440413  |
| C | -2.418361 | 0.881248  | -0.471491 |
| C | -2.606970 | 0.905305  | -1.994339 |
| O | -3.164379 | 2.133030  | 1.540008  |
| H | -1.322830 | -1.665167 | -1.395096 |
| H | -1.011140 | -2.214781 | 0.234550  |
| H | -3.739777 | -1.622928 | -1.139088 |
| H | -3.727387 | -2.164708 | 0.520361  |
| H | -5.723286 | 1.523024  | 0.448289  |
| H | -3.663886 | 2.636570  | -0.339897 |
| H | -7.030346 | -0.312773 | 0.365005  |
| H | 0.050863  | 3.616088  | 0.068133  |
| H | -7.622171 | -2.369693 | -0.851914 |
| H | -6.560807 | -1.373969 | -1.861093 |
| H | -5.923212 | -2.811403 | -1.040558 |
| H | -7.373619 | -2.362001 | 1.693088  |
| H | -6.162184 | -1.331834 | 2.473819  |
| H | -5.662690 | -2.781103 | 1.582211  |
| H | 3.188990  | 2.858658  | 0.097377  |
| H | 2.391090  | -2.610788 | -0.424406 |
| H | 5.296623  | 0.383116  | -0.895214 |
| H | 5.139131  | 0.385854  | 0.826448  |
| H | 6.337959  | -1.982813 | -0.700916 |
| H | 8.586552  | -1.054027 | -0.096326 |
| H | 7.704068  | 0.058757  | -1.154187 |
| H | 7.817682  | 0.387848  | 0.582403  |
| H | 7.340860  | -2.593792 | 1.496600  |
| H | 5.576753  | -2.534847 | 1.610946  |
| H | 6.557542  | -1.201429 | 2.257767  |
| H | -1.811391 | 0.352953  | -2.501330 |
| H | -3.568493 | 0.474754  | -2.284860 |
| H | -2.575897 | 1.940095  | -2.347768 |
| H | -3.456994 | 1.463472  | 2.172504  |

#### Conformer 72:

|   |           |           |           |
|---|-----------|-----------|-----------|
| C | -2.445119 | 1.135436  | 0.031009  |
| C | -2.630066 | -0.262741 | 0.199008  |
| C | -1.440717 | -1.052659 | 0.367025  |
| C | -0.140825 | -0.506971 | 0.351545  |
| C | -0.008323 | 0.868341  | 0.192189  |
| C | -1.145221 | 1.715356  | 0.021669  |
| C | 1.069412  | -1.399186 | 0.476051  |
| C | 2.315929  | -0.672682 | -0.039609 |
| O | 1.185692  | 1.493529  | 0.181718  |
| C | 3.620708  | -1.429514 | 0.243439  |
| C | 4.876204  | -0.623666 | -0.023055 |
| C | 4.824897  | 0.712458  | -0.168076 |
| C | 3.548195  | 1.518084  | -0.190262 |
| C | 6.168958  | -1.428563 | -0.088045 |
| H | 2.209537  | -0.570400 | -1.128996 |

|   |           |           |           |
|---|-----------|-----------|-----------|
| C | -0.999376 | 3.137395  | -0.156383 |
| C | 6.315529  | -2.117866 | -1.463837 |
| C | 7.437380  | -0.629854 | 0.245662  |
| C | -3.933295 | -0.944121 | 0.207914  |
| O | -3.974626 | -2.181821 | 0.400217  |
| O | -3.498801 | 1.937916  | -0.113917 |
| O | -1.523724 | -2.368949 | 0.541662  |
| O | -1.966016 | 3.916190  | -0.298859 |
| C | -5.240190 | -0.202021 | 0.005322  |
| C | -6.489327 | -1.094509 | -0.092858 |
| C | -7.753454 | -0.240978 | 0.097986  |
| C | -6.543733 | -1.857258 | -1.426409 |
| C | 2.396674  | 0.757388  | 0.514437  |
| C | 2.560208  | 0.835174  | 2.038468  |
| O | 3.217115  | 1.895597  | -1.533821 |
| H | 1.211887  | -1.717207 | 1.518609  |
| H | 0.906108  | -2.320312 | -0.093199 |
| H | 3.639680  | -1.759097 | 1.294052  |
| H | 3.636773  | -2.354740 | -0.346550 |
| H | 5.733571  | 1.282152  | -0.342547 |
| H | 3.691071  | 2.470971  | 0.332293  |
| H | 6.074784  | -2.226558 | 0.664345  |
| H | 0.020717  | 3.542080  | -0.170156 |
| H | 7.185898  | -2.782931 | -1.468791 |
| H | 5.437844  | -2.719427 | -1.721081 |
| H | 6.455927  | -1.370329 | -2.252782 |
| H | 8.302888  | -1.299592 | 0.283159  |
| H | 7.354375  | -0.127436 | 1.214729  |
| H | 7.649242  | 0.130655  | -0.514170 |
| H | -3.138371 | 2.878582  | -0.217265 |
| H | -2.515405 | -2.587369 | 0.530006  |
| H | -5.335349 | 0.507504  | 0.838484  |
| H | -5.151775 | 0.439274  | -0.879243 |
| H | -6.444803 | -1.832217 | 0.717285  |
| H | -8.654871 | -0.861248 | 0.041438  |
| H | -7.755291 | 0.264708  | 1.070558  |
| H | -7.832778 | 0.530201  | -0.678852 |
| H | -7.432396 | -2.496975 | -1.471715 |
| H | -5.665787 | -2.495160 | -1.559102 |
| H | -6.595440 | -1.158868 | -2.272109 |
| H | 1.737281  | 0.330802  | 2.551759  |
| H | 3.500988  | 0.383852  | 2.363357  |
| H | 2.559142  | 1.883568  | 2.350864  |
| H | 3.510741  | 1.193554  | -2.129515 |

**Conformer 73:**

|   |           |           |           |
|---|-----------|-----------|-----------|
| C | -2.566113 | 0.877044  | -0.300126 |
| C | -2.660697 | -0.532604 | -0.456995 |
| C | -1.427406 | -1.270781 | -0.383914 |
| C | -0.174603 | -0.665124 | -0.155735 |
| C | -0.134108 | 0.714205  | 0.013995  |
| C | -1.314684 | 1.514127  | -0.067616 |
| C | 1.086815  | -1.492228 | -0.132989 |
| C | 2.310836  | -0.597244 | -0.354181 |
| O | 1.006342  | 1.390169  | 0.254910  |
| C | 3.642110  | -1.327766 | -0.127953 |
| C | 4.852127  | -0.412889 | -0.113009 |
| C | 4.708176  | 0.917056  | 0.031542  |
| C | 3.381446  | 1.633500  | 0.105747  |
| C | 6.206188  | -1.100058 | -0.247646 |
| H | 2.281351  | -0.251517 | -1.397350 |
| C | -1.258718 | 2.945977  | 0.078398  |
| C | 7.387084  | -0.151241 | -0.493382 |
| C | 6.496350  | -2.006674 | 0.970491  |
| C | -3.903601 | -1.273065 | -0.711580 |
| O | -3.854033 | -2.517556 | -0.871876 |
| O | -3.658408 | 1.636978  | -0.364725 |
| O | -1.423678 | -2.590932 | -0.536476 |
| O | -2.265453 | 3.684217  | 0.018704  |
| C | -5.269377 | -0.627632 | -0.775863 |
| C | -5.892464 | -0.341729 | 0.619790  |

|   |           |           |           |
|---|-----------|-----------|-----------|
| C | -7.193343 | 0.455179  | 0.442864  |
| C | -6.138605 | -1.630796 | 1.417621  |
| C | 2.242270  | 0.666380  | 0.515538  |
| C | 2.289753  | 0.396335  | 2.025500  |
| O | 3.112976  | 2.310460  | -1.129709 |
| H | 1.175513  | -2.038349 | 0.816917  |
| H | 1.034872  | -2.261020 | -0.911032 |
| H | 3.594094  | -1.882495 | 0.820216  |
| H | 3.771663  | -2.093354 | -0.904834 |
| H | 5.577849  | 1.567677  | 0.032817  |
| H | 3.425820  | 2.437013  | 0.850103  |
| H | 6.127305  | -1.760165 | -1.125888 |
| H | -0.272782 | 3.398171  | 0.244953  |
| H | 8.298552  | -0.730762 | -0.672193 |
| H | 7.220556  | 0.489331  | -1.365374 |
| H | 7.574693  | 0.493705  | 0.372711  |
| H | 7.446498  | -2.533773 | 0.833674  |
| H | 5.719591  | -2.762263 | 1.120795  |
| H | 6.571180  | -1.408389 | 1.886019  |
| H | -3.356694 | 2.595658  | -0.233459 |
| H | -2.393862 | -2.851882 | -0.707765 |
| H | -5.217852 | 0.307088  | -1.336799 |
| H | -5.909760 | -1.334770 | -1.313787 |
| H | -5.189576 | 0.287257  | 1.178884  |
| H | -7.646302 | 0.681306  | 1.414679  |
| H | -7.011676 | 1.403600  | -0.073808 |
| H | -7.926720 | -0.114778 | -0.141568 |
| H | -6.561423 | -1.396405 | 2.401079  |
| H | -5.218453 | -2.201922 | 1.575605  |
| H | -6.846103 | -2.286581 | 0.895622  |
| H | 1.478247  | -0.267165 | 2.335810  |
| H | 3.240048  | -0.055174 | 2.321036  |
| H | 2.177939  | 1.340540  | 2.566437  |
| H | 3.476854  | 1.782890  | -1.853105 |

**Conformer 79:**

|   |           |           |           |
|---|-----------|-----------|-----------|
| C | 2.572260  | 0.860401  | -0.338484 |
| C | 2.620021  | -0.553639 | -0.475607 |
| C | 1.354272  | -1.236656 | -0.526174 |
| C | 0.112644  | -0.573597 | -0.442561 |
| C | 0.115176  | 0.812013  | -0.328915 |
| C | 1.332703  | 1.556117  | -0.264324 |
| C | -1.178171 | -1.354144 | -0.449023 |
| C | -2.315066 | -0.500426 | 0.122294  |
| O | -1.014059 | 1.544389  | -0.263881 |
| C | -3.697805 | -1.148816 | -0.042598 |
| C | -4.849564 | -0.222991 | 0.292678  |
| C | -4.666139 | 1.106684  | 0.385937  |
| C | -3.330559 | 1.799542  | 0.274587  |
| C | -6.228849 | -0.835310 | 0.495458  |
| H | -2.122666 | -0.373592 | 1.197215  |
| C | 1.325955  | 2.989342  | -0.121327 |
| C | -6.687374 | -1.662461 | -0.721963 |
| C | -6.303830 | -1.675415 | 1.787462  |
| C | 3.848710  | -1.351292 | -0.584491 |
| O | 3.761033  | -2.596115 | -0.725057 |
| O | 3.698367  | 1.569511  | -0.276580 |
| O | 1.307748  | -2.558461 | -0.655415 |
| O | 2.365500  | 3.680913  | -0.066148 |
| C | 5.241033  | -0.765534 | -0.519714 |
| C | 5.737692  | -0.491768 | 0.928324  |
| C | 5.854229  | -1.781966 | 1.753191  |
| C | 7.080410  | 0.251770  | 0.873333  |
| C | -2.307765 | 0.912444  | -0.480095 |
| C | -2.576808 | 0.955474  | -1.990348 |
| O | -2.863737 | 2.198457  | 1.570677  |
| H | -1.422870 | -1.691469 | -1.466227 |
| H | -1.057124 | -2.267453 | 0.142919  |
| H | -3.815232 | -1.502565 | -1.077504 |
| H | -3.745324 | -2.052093 | 0.577963  |
| H | -5.511487 | 1.751588  | 0.620596  |

|   |           |           |           |
|---|-----------|-----------|-----------|
| H | -3.433864 | 2.740246  | -0.278512 |
| H | -6.930909 | 0.000681  | 0.609924  |
| H | 0.349257  | 3.485117  | -0.053582 |
| H | -7.717777 | -2.005462 | -0.579797 |
| H | -6.653843 | -1.070815 | -1.643117 |
| H | -6.063508 | -2.551793 | -0.865773 |
| H | -7.327247 | -2.031697 | 1.947871  |
| H | -6.010703 | -1.086042 | 2.662498  |
| H | -5.655448 | -2.557417 | 1.738539  |
| H | 3.427818  | 2.541979  | -0.185629 |
| H | 2.278263  | -2.864833 | -0.710780 |
| H | 5.899273  | -1.505377 | -0.987633 |
| H | 5.285585  | 0.164457  | -1.088951 |
| H | 5.010052  | 0.169626  | 1.413383  |
| H | 6.188681  | -1.554760 | 2.771722  |
| H | 4.901319  | -2.315496 | 1.823926  |
| H | 6.582661  | -2.469421 | 1.306069  |
| H | 7.446557  | 0.468765  | 1.883070  |
| H | 6.987304  | 1.201905  | 0.336628  |
| H | 7.843155  | -0.351925 | 0.365340  |
| H | -1.845605 | 0.357514  | -2.540649 |
| H | -3.577460 | 0.586468  | -2.228812 |
| H | -2.500997 | 1.988074  | -2.343407 |
| H | -3.165728 | 1.547604  | 2.218097  |

**Conformer 80:**

|   |           |           |           |
|---|-----------|-----------|-----------|
| C | -2.549905 | 0.847386  | -0.341727 |
| C | -2.598943 | -0.570560 | -0.429385 |
| C | -1.345973 | -1.265713 | -0.294747 |
| C | -0.116995 | -0.610897 | -0.073024 |
| C | -0.121437 | 0.775686  | 0.028455  |
| C | -1.323426 | 1.533647  | -0.116301 |
| C | 1.168137  | -1.396076 | 0.014214  |
| C | 2.368521  | -0.475243 | -0.228945 |
| O | 0.992977  | 1.497561  | 0.258007  |
| C | 3.716979  | -1.155968 | 0.050430  |
| C | 4.893669  | -0.201277 | 0.053586  |
| C | 4.707821  | 1.128472  | 0.140625  |
| C | 3.361373  | 1.809132  | 0.142463  |
| C | 6.296589  | -0.788975 | -0.016358 |
| H | 2.347289  | -0.179570 | -1.287501 |
| C | -1.313607 | 2.972005  | -0.040869 |
| C | 6.565735  | -1.798345 | 1.117404  |
| C | 6.590737  | -1.421125 | -1.392759 |
| C | -3.813357 | -1.360851 | -0.671288 |
| O | -3.723292 | -2.609797 | -0.766389 |
| O | -3.662812 | 1.568997  | -0.466453 |
| O | -1.299497 | -2.591051 | -0.380403 |
| O | -2.340416 | 3.674854  | -0.157806 |
| C | -5.195898 | -0.761951 | -0.797158 |
| C | -5.858800 | -0.425998 | 0.568731  |
| C | -7.177604 | 0.322052  | 0.324145  |
| C | -6.085950 | -1.680729 | 1.424778  |
| C | 2.244763  | 0.826122  | 0.577243  |
| C | 2.269323  | 0.630254  | 2.099059  |
| O | 3.099964  | 2.406808  | -1.135001 |
| H | 1.254399  | -1.892085 | 0.991433  |
| H | 1.154915  | -2.203269 | -0.725655 |
| H | 3.673614  | -1.669965 | 1.021996  |
| H | 3.876281  | -1.950391 | -0.689018 |
| H | 5.570302  | 1.793055  | 0.149385  |
| H | 3.361125  | 2.651636  | 0.843813  |
| H | 6.995367  | 0.047523  | 0.113548  |
| H | -0.345515 | 3.462189  | 0.122911  |
| H | 7.610526  | -2.126002 | 1.092056  |
| H | 6.375864  | -1.355244 | 2.100917  |
| H | 5.939984  | -2.692661 | 1.020432  |
| H | 7.632133  | -1.757839 | -1.439233 |
| H | 6.432273  | -0.701743 | -2.202915 |
| H | 5.956952  | -2.294253 | -1.584215 |
| H | -3.392909 | 2.541878  | -0.377416 |

|   |           |           |           |
|---|-----------|-----------|-----------|
| H | -2.257882 | -2.890116 | -0.556793 |
| H | -5.159487 | 0.144713  | -1.403472 |
| H | -5.802552 | -1.514514 | -1.312062 |
| H | -5.187232 | 0.250614  | 1.110447  |
| H | -7.659058 | 0.582505  | 1.273408  |
| H | -7.011428 | 1.248702  | -0.235471 |
| H | -7.880734 | -0.297764 | -0.246541 |
| H | -6.537288 | -1.410636 | 2.386155  |
| H | -5.153634 | -2.215794 | 1.630436  |
| H | -6.762533 | -2.382206 | 0.921522  |
| H | 1.468504  | -0.038336 | 2.425671  |
| H | 3.224423  | 0.217664  | 2.433487  |
| H | 2.123541  | 1.595846  | 2.592059  |
| H | 3.526850  | 1.870799  | -1.816448 |

**Conformer 83:**

|   |           |           |           |
|---|-----------|-----------|-----------|
| C | 2.583112  | 0.845183  | -0.393461 |
| C | 2.675383  | -0.572899 | -0.427419 |
| C | 1.432072  | -1.297585 | -0.410899 |
| C | 0.170413  | -0.669932 | -0.359893 |
| C | 0.129130  | 0.719698  | -0.347509 |
| C | 1.322429  | 1.504758  | -0.353428 |
| C | -1.094282 | -1.489603 | -0.293970 |
| C | -2.253317 | -0.632962 | 0.226466  |
| O | -1.022413 | 1.418888  | -0.320722 |
| C | -3.616637 | -1.330643 | 0.118184  |
| C | -4.797363 | -0.423660 | 0.409146  |
| C | -4.652985 | 0.914060  | 0.415444  |
| C | -3.340909 | 1.636561  | 0.227119  |
| C | -6.126737 | -1.124819 | 0.664117  |
| H | -2.057329 | -0.424456 | 1.287954  |
| C | 1.270485  | 2.943666  | -0.314836 |
| C | -7.237776 | -0.217600 | 1.209740  |
| C | -6.618317 | -1.867408 | -0.599539 |
| C | 3.928165  | -1.337017 | -0.494338 |
| O | 3.879664  | -2.590985 | -0.541542 |
| O | 3.686111  | 1.592296  | -0.398688 |
| O | 1.427365  | -2.626135 | -0.442307 |
| O | 2.287456  | 3.670078  | -0.324301 |
| C | 5.301168  | -0.703968 | -0.492637 |
| C | 5.805335  | -0.307665 | 0.924112  |
| C | 5.974472  | -1.528858 | 1.839950  |
| C | 7.121773  | 0.472842  | 0.795705  |
| C | -2.296827 | 0.732319  | -0.475148 |
| C | -2.582563 | 0.658807  | -1.981192 |
| O | -2.872054 | 2.149607  | 1.481571  |
| H | -1.337173 | -1.908086 | -1.281013 |
| H | -0.938035 | -2.352807 | 0.361466  |
| H | -3.725762 | -1.757939 | -0.889064 |
| H | -3.638607 | -2.190563 | 0.801210  |
| H | -5.500205 | 1.557856  | 0.633127  |
| H | -3.485356 | 2.529034  | -0.392786 |
| H | -5.925161 | -1.892450 | 1.427934  |
| H | 0.278956  | 3.411800  | -0.269756 |
| H | -8.121183 | -0.816865 | 1.452776  |
| H | -6.926681 | 0.305432  | 2.119737  |
| H | -7.545059 | 0.533367  | 0.472918  |
| H | -7.545168 | -2.409749 | -0.384730 |
| H | -5.887915 | -2.595651 | -0.964264 |
| H | -6.823204 | -1.156297 | -1.408290 |
| H | 3.384956  | 2.559735  | -0.375199 |
| H | 2.406707  | -2.904773 | -0.487597 |
| H | 5.977862  | -1.455163 | -0.913806 |
| H | 5.308465  | 0.182098  | -1.129632 |
| H | 5.061689  | 0.363880  | 1.369302  |
| H | 6.312240  | -1.216245 | 2.834477  |
| H | 5.041028  | -2.086838 | 1.962550  |
| H | 6.720760  | -2.223100 | 1.434722  |
| H | 7.492462  | 0.775137  | 1.781561  |
| H | 6.990647  | 1.377444  | 0.192416  |
| H | 7.898107  | -0.141534 | 0.322282  |

|   |           |          |           |
|---|-----------|----------|-----------|
| H | -1.841097 | 0.042393 | -2.496279 |
| H | -3.575214 | 0.247282 | -2.179983 |
| H | -2.538722 | 1.665016 | -2.408106 |
| H | -3.128377 | 1.532403 | 2.179705  |

**Conformer 86:**

|   |           |           |           |
|---|-----------|-----------|-----------|
| C | -2.452032 | 1.123824  | 0.129931  |
| C | -2.631321 | -0.284724 | 0.164231  |
| C | -1.437342 | -1.083284 | 0.223819  |
| C | -0.138799 | -0.534183 | 0.229530  |
| C | -0.011805 | 0.850496  | 0.203545  |
| C | -1.153371 | 1.706333  | 0.145286  |
| C | 1.075218  | -1.429741 | 0.236375  |
| C | 2.308617  | -0.652679 | -0.235795 |
| O | 1.180824  | 1.477820  | 0.225590  |
| C | 3.619593  | -1.430232 | -0.051851 |
| C | 4.866434  | -0.601113 | -0.295568 |
| C | 4.804920  | 0.742671  | -0.323880 |
| C | 3.532221  | 1.546398  | -0.208536 |
| C | 6.160767  | -1.385375 | -0.478434 |
| H | 2.177850  | -0.448298 | -1.308080 |
| C | -1.013213 | 3.139478  | 0.104029  |
| C | 7.351092  | -0.554367 | -0.976081 |
| C | 6.543216  | -2.142324 | 0.814123  |
| C | -3.933290 | -0.968141 | 0.139177  |
| O | -3.968602 | -2.218828 | 0.210387  |
| O | -3.509767 | 1.933097  | 0.090888  |
| O | -1.514631 | -2.410635 | 0.270346  |
| O | -1.983797 | 3.925284  | 0.062867  |
| C | -5.245504 | -0.214106 | 0.043216  |
| C | -6.496218 | -1.096649 | -0.109450 |
| C | -7.755404 | -0.269335 | 0.195568  |
| C | -6.584599 | -1.726317 | -1.509033 |
| C | 2.401347  | 0.717597  | 0.451283  |
| C | 2.608133  | 0.648485  | 1.970424  |
| O | 3.157825  | 2.069693  | -1.490095 |
| H | 1.243627  | -1.847332 | 1.239215  |
| H | 0.899023  | -2.291595 | -0.415779 |
| H | 3.653358  | -1.847701 | 0.964835  |
| H | 3.621729  | -2.300360 | -0.722197 |
| H | 5.699476  | 1.330661  | -0.507280 |
| H | 3.701146  | 2.437053  | 0.407764  |
| H | 5.949540  | -2.147941 | -1.244747 |
| H | 0.005904  | 3.546840  | 0.104321  |
| H | 8.206863  | -1.209314 | -1.169196 |
| H | 7.118124  | -0.024414 | -1.905217 |
| H | 7.667195  | 0.185380  | -0.231684 |
| H | 7.444444  | -2.742487 | 0.650021  |
| H | 5.752491  | -2.820617 | 1.148102  |
| H | 6.751476  | -1.436029 | 1.626230  |
| H | -3.152864 | 2.880518  | 0.071573  |
| H | -2.506055 | -2.630310 | 0.262850  |
| H | -5.319681 | 0.410653  | 0.943660  |
| H | -5.180256 | 0.510513  | -0.776660 |
| H | -6.430610 | -1.909452 | 0.623752  |
| H | -8.657744 | -0.883744 | 0.101972  |
| H | -7.732522 | 0.139555  | 1.212374  |
| H | -7.854761 | 0.573350  | -0.500480 |
| H | -7.473700 | -2.361442 | -1.593486 |
| H | -5.709949 | -2.345467 | -1.725729 |
| H | -6.658690 | -0.949160 | -2.281155 |
| H | 1.805507  | 0.086349  | 2.455085  |
| H | 3.562404  | 0.179652  | 2.223109  |
| H | 2.605981  | 1.661577  | 2.383070  |
| H | 3.403931  | 1.425853  | -2.167568 |

**Conformer 87:**

|   |           |           |           |
|---|-----------|-----------|-----------|
| C | -2.552405 | 0.845594  | -0.373878 |
| C | -2.651660 | -0.572213 | -0.398616 |
| C | -1.426001 | -1.304684 | -0.218239 |
| C | -0.176297 | -0.684698 | -0.012706 |



|   |           |           |           |
|---|-----------|-----------|-----------|
| C | -0.131350 | 0.704510  | 0.024726  |
| C | -1.304104 | 1.497289  | -0.166267 |
| C | 1.078821  | -1.510598 | 0.123280  |
| C | 2.312031  | -0.644830 | -0.154007 |
| O | 1.006453  | 1.396218  | 0.231581  |
| C | 3.635814  | -1.353529 | 0.163603  |
| C | 4.847508  | -0.443511 | 0.144332  |
| C | 4.710760  | 0.894164  | 0.174305  |
| C | 3.385717  | 1.615868  | 0.121870  |
| C | 6.197101  | -1.151267 | 0.112750  |
| H | 2.305213  | -0.397202 | -1.225074 |
| C | -1.243214 | 2.936327  | -0.155281 |
| C | 6.529507  | -1.631672 | -1.318396 |
| C | 7.363247  | -0.331243 | 0.683593  |
| C | -3.891140 | -1.328908 | -0.619902 |
| O | -3.845247 | -2.583308 | -0.657606 |
| O | -3.637479 | 1.599886  | -0.542630 |
| O | -1.426722 | -2.633356 | -0.243189 |
| O | -2.242921 | 3.669312  | -0.314396 |
| C | -5.249639 | -0.687567 | -0.790459 |
| C | -5.915920 | -0.267435 | 0.550200  |
| C | -7.204253 | 0.514740  | 0.255047  |
| C | -6.197837 | -1.473501 | 1.458320  |
| C | 2.231007  | 0.695440  | 0.591256  |
| C | 2.237866  | 0.568634  | 2.120666  |
| O | 3.160583  | 2.156079  | -1.187718 |
| H | 1.141038  | -1.961553 | 1.123841  |
| H | 1.041512  | -2.351441 | -0.577206 |
| H | 3.576260  | -1.826475 | 1.156390  |
| H | 3.778821  | -2.183469 | -0.540018 |
| H | 5.586943  | 1.536765  | 0.176860  |
| H | 3.404554  | 2.493341  | 0.778509  |
| H | 6.089543  | -2.050640 | 0.738307  |
| H | -0.259637 | 3.398652  | -0.003170 |
| H | 7.443647  | -2.235170 | -1.317651 |
| H | 5.729111  | -2.243894 | -1.746045 |
| H | 6.690250  | -0.774168 | -1.981566 |
| H | 8.268460  | -0.945982 | 0.725182  |
| H | 7.148156  | 0.025547  | 1.695937  |
| H | 7.591413  | 0.538908  | 0.057993  |
| H | -3.333675 | 2.565644  | -0.494272 |
| H | -2.393462 | -2.905699 | -0.417162 |
| H | -5.173537 | 0.189164  | -1.435852 |
| H | -5.876992 | -1.440434 | -1.279454 |
| H | -5.226957 | 0.408873  | 1.070001  |
| H | -7.686967 | 0.834689  | 1.185295  |
| H | -6.998654 | 1.408661  | -0.343375 |
| H | -7.922468 | -0.105192 | -0.296409 |
| H | -6.651282 | -1.144531 | 2.400156  |
| H | -5.287625 | -2.030765 | 1.700787  |
| H | -6.892500 | -2.173115 | 0.977611  |
| H | 1.407533  | -0.050213 | 2.470836  |
| H | 3.172611  | 0.132347  | 2.481489  |
| H | 2.129608  | 1.561017  | 2.568090  |
| H | 3.568401  | 1.566217  | -1.835535 |

**Table S20.** Eucalypcamal K (**2b**) DFT geometry optimized conformers calculated at the B3LYP/6-31+G(d,p) level of theory.

**Conformer 5:**

|   |           |           |           |
|---|-----------|-----------|-----------|
| C | 1.816942  | -1.205267 | -0.466279 |
| C | 1.935500  | -0.588789 | 0.806386  |
| C | 0.720391  | -0.415006 | 1.559183  |
| C | -0.559027 | -0.816059 | 1.089155  |
| C | -0.619297 | -1.380955 | -0.178749 |
| C | 0.545634  | -1.595453 | -0.971977 |
| C | -1.748938 | -0.728074 | 2.027416  |
| C | -3.052644 | -0.069363 | 1.516726  |

|   |           |           |           |
|---|-----------|-----------|-----------|
| O | -1.786343 | -1.817716 | -0.730198 |
| C | -2.820191 | 1.377248  | 1.024149  |
| C | -2.429149 | 1.510219  | -0.437028 |
| C | -2.518754 | 0.461848  | -1.275951 |
| C | -2.945829 | -0.914088 | -0.842561 |
| C | -1.965013 | 2.893637  | -0.877677 |
| H | -3.722599 | -0.023004 | 2.383949  |
| C | 0.455612  | -2.187153 | -2.284156 |
| C | -1.296186 | 2.936332  | -2.258655 |
| C | -3.118580 | 3.921218  | -0.813499 |
| C | 3.206399  | -0.152702 | 1.409773  |
| O | 3.199215  | 0.349872  | 2.559348  |
| O | 2.894464  | -1.416060 | -1.221114 |
| O | 0.772383  | 0.132296  | 2.768904  |
| O | 1.445878  | -2.399876 | -3.015011 |
| C | 4.546027  | -0.252344 | 0.716643  |
| C | 4.808074  | 0.890086  | -0.305659 |
| C | 4.854593  | 2.269135  | 0.368811  |
| C | 6.111225  | 0.602803  | -1.065845 |
| C | -3.792599 | -0.896297 | 0.443244  |
| C | -4.170867 | -2.303322 | 0.901703  |
| O | -5.053929 | -0.276090 | 0.122408  |
| H | -1.982964 | -1.738903 | 2.383649  |
| H | -1.427984 | -0.172684 | 2.909745  |
| H | -3.728506 | 1.968271  | 1.200795  |
| H | -2.047176 | 1.853175  | 1.641949  |
| H | -2.233163 | 0.563888  | -2.318676 |
| H | -3.531076 | -1.398371 | -1.629446 |
| H | -1.213298 | 3.208858  | -0.137913 |
| H | -0.544297 | -2.460838 | -2.643808 |
| H | -0.902039 | 3.939767  | -2.449116 |
| H | -0.463437 | 2.229631  | -2.329276 |
| H | -2.007514 | 2.708444  | -3.060831 |
| H | -2.752126 | 4.918337  | -1.079137 |
| H | -3.561531 | 3.988885  | 0.184305  |
| H | -3.911544 | 3.655213  | -1.522468 |
| H | 2.572490  | -1.852151 | -2.076122 |
| H | 1.756612  | 0.334650  | 2.945455  |
| H | 5.297757  | -0.197898 | 1.511136  |
| H | 4.635307  | -1.211599 | 0.204365  |
| H | 3.988743  | 0.883750  | -1.034288 |
| H | 5.023366  | 3.053549  | -0.377537 |
| H | 3.925386  | 2.503401  | 0.897622  |
| H | 5.670042  | 2.321183  | 1.100404  |
| H | 6.312585  | 1.388115  | -1.802969 |
| H | 6.059469  | -0.353562 | -1.596925 |
| H | 6.966150  | 0.563974  | -0.379075 |
| H | -4.752266 | -2.247686 | 1.827298  |
| H | -4.795354 | -2.774925 | 0.137230  |
| H | -3.295831 | -2.933040 | 1.066491  |
| H | -4.888486 | 0.556240  | -0.342418 |

**Conformer 6:**

|   |           |           |           |
|---|-----------|-----------|-----------|
| C | 1.591111  | -1.402340 | -0.584041 |
| C | 1.897321  | -0.353664 | 0.320592  |
| C | 0.817612  | 0.134360  | 1.136745  |
| C | -0.506716 | -0.376001 | 1.074537  |
| C | -0.756474 | -1.379268 | 0.146134  |
| C | 0.267395  | -1.913955 | -0.688234 |
| C | -1.528986 | 0.102706  | 2.089267  |
| C | -2.918750 | 0.559739  | 1.585103  |
| O | -1.982440 | -1.958321 | 0.006880  |
| C | -2.814380 | 1.699475  | 0.544620  |
| C | -2.684535 | 1.244288  | -0.896128 |
| C | -2.883772 | -0.041233 | -1.241502 |
| C | -3.176526 | -1.133424 | -0.250599 |
| C | -2.356319 | 2.288624  | -1.954484 |
| H | -3.438542 | 0.958904  | 2.464609  |
| C | -0.017397 | -2.955668 | -1.644395 |
| C | -3.369958 | 3.450230  | -1.971450 |
| C | -0.915848 | 2.822540  | -1.809201 |

|   |           |           |           |
|---|-----------|-----------|-----------|
| C | 3.236175  | 0.249323  | 0.480795  |
| O | 3.392875  | 1.168823  | 1.315831  |
| O | 2.538584  | -1.918867 | -1.366117 |
| O | 1.045580  | 1.105214  | 2.017157  |
| O | 0.845259  | -3.459932 | -2.393367 |
| C | 4.426925  | -0.210895 | -0.336099 |
| C | 5.778789  | 0.494485  | -0.095143 |
| C | 5.767280  | 1.983696  | -0.480128 |
| C | 6.342746  | 0.269178  | 1.318100  |
| C | -3.798480 | -0.591558 | 1.050675  |
| C | -4.048839 | -1.699945 | 2.071561  |
| O | -5.115183 | -0.100069 | 0.729859  |
| H | -1.669759 | -0.687388 | 2.837097  |
| H | -1.086097 | 0.941544  | 2.627859  |
| H | -3.699043 | 2.345653  | 0.623457  |
| H | -1.967172 | 2.346502  | 0.802356  |
| H | -2.796733 | -0.339306 | -2.284906 |
| H | -3.866305 | -1.865907 | -0.679281 |
| H | -2.419571 | 1.781661  | -2.926130 |
| H | -1.053068 | -3.313750 | -1.702509 |
| H | -3.158758 | 4.121324  | -2.810746 |
| H | -4.397156 | 3.086192  | -2.084207 |
| H | -3.318355 | 4.047064  | -1.054280 |
| H | -0.683373 | 3.503393  | -2.635229 |
| H | -0.185874 | 2.007397  | -1.825754 |
| H | -0.780413 | 3.380112  | -0.876192 |
| H | 2.095658  | -2.632491 | -1.930346 |
| H | 2.030851  | 1.340015  | 1.929044  |
| H | 4.536049  | -1.290618 | -0.175327 |
| H | 4.149279  | -0.132816 | -1.394375 |
| H | 6.464679  | -0.007554 | -0.793298 |
| H | 6.783150  | 2.393382  | -0.444249 |
| H | 5.390104  | 2.126383  | -1.500169 |
| H | 5.142061  | 2.567182  | 0.200365  |
| H | 7.368525  | 0.649612  | 1.382901  |
| H | 6.370573  | -0.798401 | 1.567908  |
| H | 5.742339  | 0.781272  | 2.074089  |
| H | -4.466802 | -1.272598 | 2.988373  |
| H | -4.778338 | -2.405777 | 1.663623  |
| H | -3.139034 | -2.249526 | 2.315697  |
| H | -5.056503 | 0.479611  | -0.042664 |

**Conformer 9:**

|   |           |           |           |
|---|-----------|-----------|-----------|
| C | 1.514057  | 1.382154  | 0.560526  |
| C | 1.866911  | 0.354121  | -0.350632 |
| C | 0.814845  | -0.160884 | -1.185914 |
| C | -0.526229 | 0.305374  | -1.137728 |
| C | -0.821428 | 1.290114  | -0.202808 |
| C | 0.172917  | 1.848830  | 0.651463  |
| C | -1.518275 | -0.197008 | -2.171027 |
| C | -2.899777 | -0.701366 | -1.689742 |
| O | -2.066741 | 1.828720  | -0.075335 |
| C | -2.773088 | -1.840166 | -0.653149 |
| C | -2.682990 | -1.396698 | 0.794614  |
| C | -2.931672 | -0.122829 | 1.149062  |
| C | -3.238842 | 0.965769  | 0.156689  |
| C | -2.333336 | -2.492663 | 1.793954  |
| H | -3.394727 | -1.111272 | -2.578618 |
| C | -0.159027 | 2.870189  | 1.614286  |
| C | -0.814347 | -2.780745 | 1.781823  |
| C | -2.813007 | -2.227733 | 3.228783  |
| C | 3.226778  | -0.203027 | -0.498110 |
| O | 3.425162  | -1.107773 | -1.340473 |
| O | 2.433181  | 1.920754  | 1.361337  |
| O | 1.086360  | -1.115960 | -2.071438 |
| O | 0.676129  | 3.393892  | 2.380961  |
| C | 4.390270  | 0.286620  | 0.340709  |
| C | 5.768007  | -0.370678 | 0.110796  |
| C | 5.800771  | -1.864030 | 0.478106  |
| C | 6.343440  | -0.109563 | -1.291606 |
| C | -3.822969 | 0.417101  | -1.158859 |

|   |           |           |           |
|---|-----------|-----------|-----------|
| C | -4.091783 | 1.526774  | -2.173656 |
| O | -5.128664 | -0.117933 | -0.863554 |
| H | -1.672950 | 0.594064  | -2.915072 |
| H | -1.041660 | -1.017388 | -2.709278 |
| H | -3.634966 | -2.517899 | -0.740311 |
| H | -1.902597 | -2.460864 | -0.899359 |
| H | -2.886669 | 0.178071  | 2.191943  |
| H | -3.957216 | 1.674516  | 0.578191  |
| H | -2.836953 | -3.405150 | 1.440119  |
| H | -1.206523 | 3.193833  | 1.661261  |
| H | -0.586690 | -3.641281 | 2.420061  |
| H | -0.442614 | -3.003631 | 0.777355  |
| H | -0.258090 | -1.917919 | 2.163986  |
| H | -2.619793 | -3.104940 | 3.854902  |
| H | -3.886548 | -2.015602 | 3.265044  |
| H | -2.283834 | -1.382996 | 3.683614  |
| H | 1.959267  | 2.613281  | 1.926655  |
| H | 2.077969  | -1.318139 | -1.972787 |
| H | 4.465631  | 1.371215  | 0.194148  |
| H | 4.100778  | 0.186512  | 1.393982  |
| H | 6.427157  | 0.145266  | 0.824405  |
| H | 6.830111  | -2.239394 | 0.451886  |
| H | 5.414484  | -2.031542 | 1.490945  |
| H | 5.204734  | -2.459522 | -0.217979 |
| H | 7.381791  | -0.455872 | -1.346752 |
| H | 6.339992  | 0.961415  | -1.528038 |
| H | 5.770199  | -0.631221 | -2.062003 |
| H | -4.482359 | 1.095151  | -3.100494 |
| H | -4.848824 | 2.206151  | -1.771026 |
| H | -3.195736 | 2.106198  | -2.399000 |
| H | -5.064147 | -0.702572 | -0.095241 |

**Conformer 11:**

|   |           |           |           |
|---|-----------|-----------|-----------|
| C | 1.669168  | 1.096407  | 0.633496  |
| C | 1.917399  | 0.110067  | -0.354549 |
| C | 0.817330  | -0.243244 | -1.211238 |
| C | -0.467049 | 0.357466  | -1.126357 |
| C | -0.660029 | 1.301665  | -0.125184 |
| C | 0.383609  | 1.692140  | 0.763131  |
| C | -1.504362 | 0.032982  | -2.185737 |
| C | -2.930769 | -0.361099 | -1.733468 |
| O | -1.844929 | 1.953486  | 0.045416  |
| C | -2.924248 | -1.580116 | -0.782940 |
| C | -2.777190 | -1.252315 | 0.692456  |
| C | -2.885384 | 0.013951  | 1.134883  |
| C | -3.096181 | 1.194960  | 0.227182  |
| C | -2.531383 | -2.440027 | 1.615740  |
| H | -3.463443 | -0.652721 | -2.646866 |
| C | 0.155079  | 2.667206  | 1.801184  |
| C | -2.088202 | -2.066717 | 3.037198  |
| C | -3.762145 | -3.374360 | 1.670621  |
| C | 3.216606  | -0.557460 | -0.557790 |
| O | 3.316618  | -1.446520 | -1.433744 |
| O | 2.634515  | 1.467285  | 1.474008  |
| O | 0.988942  | -1.165184 | -2.154845 |
| O | 1.035954  | 3.039908  | 2.603886  |
| C | 4.443645  | -0.218185 | 0.265271  |
| C | 5.741473  | -0.913310 | -0.181263 |
| C | 6.279711  | -0.328761 | -1.497208 |
| C | 6.795470  | -0.808026 | 0.932756  |
| C | -3.735927 | 0.803619  | -1.117561 |
| C | -3.894567 | 2.003682  | -2.049068 |
| O | -5.088058 | 0.382358  | -0.847636 |
| H | -1.576913 | 0.886729  | -2.870741 |
| H | -1.113313 | -0.791449 | -2.783552 |
| H | -3.849870 | -2.153184 | -0.925624 |
| H | -2.117804 | -2.265810 | -1.074841 |
| H | -2.774746 | 0.240247  | 2.191181  |
| H | -3.739944 | 1.936991  | 0.707986  |
| H | -1.712854 | -3.014605 | 1.155803  |
| H | -0.852640 | 3.095675  | 1.874006  |

|   |           |           |           |
|---|-----------|-----------|-----------|
| H | -1.833826 | -2.972810 | 3.596482  |
| H | -1.207121 | -1.417459 | 3.031395  |
| H | -2.885694 | -1.556512 | 3.589591  |
| H | -3.545343 | -4.249585 | 2.291988  |
| H | -4.053953 | -3.737975 | 0.681150  |
| H | -4.621227 | -2.854617 | 2.111128  |
| H | 2.234354  | 2.160931  | 2.091840  |
| H | 1.950566  | -1.482930 | -2.067887 |
| H | 4.572342  | 0.870250  | 0.280029  |
| H | 4.207272  | -0.470753 | 1.307846  |
| H | 5.519575  | -1.974234 | -0.347645 |
| H | 7.195852  | -0.845262 | -1.804931 |
| H | 5.552612  | -0.427873 | -2.307673 |
| H | 6.523618  | 0.735225  | -1.379200 |
| H | 7.725159  | -1.306889 | 0.637660  |
| H | 6.447002  | -1.272130 | 1.862700  |
| H | 7.037264  | 0.239552  | 1.152963  |
| H | -4.330140 | 1.680156  | -2.999572 |
| H | -4.577451 | 2.725795  | -1.591853 |
| H | -2.945227 | 2.504314  | -2.242709 |
| H | -5.080761 | -0.262887 | -0.126651 |

**Conformer 12:**

|   |           |           |           |
|---|-----------|-----------|-----------|
| C | 1.637103  | -1.200921 | -0.552419 |
| C | 1.867570  | -0.124424 | 0.341391  |
| C | 0.750156  | 0.312710  | 1.134477  |
| C | -0.534835 | -0.290295 | 1.078890  |
| C | -0.709226 | -1.327085 | 0.170048  |
| C | 0.352086  | -1.803110 | -0.653254 |
| C | -1.593090 | 0.137832  | 2.079277  |
| C | -3.009269 | 0.485300  | 1.561289  |
| O | -1.891386 | -1.992390 | 0.037698  |
| C | -2.980375 | 1.608809  | 0.498803  |
| C | -2.809265 | 1.135644  | -0.931758 |
| C | -2.916402 | -0.167187 | -1.252289 |
| C | -3.138421 | -1.257584 | -0.241234 |
| C | -2.546320 | 2.179273  | -2.008822 |
| H | -3.560164 | 0.863956  | 2.430874  |
| C | 0.142213  | -2.872347 | -1.598425 |
| C | -3.637349 | 3.267674  | -2.055052 |
| C | -1.147098 | 2.813996  | -1.865591 |
| C | 3.165540  | 0.555283  | 0.509932  |
| O | 3.249842  | 1.525759  | 1.296462  |
| O | 2.619317  | -1.653382 | -1.331046 |
| O | 0.904799  | 1.321567  | 1.987799  |
| O | 1.039357  | -3.322894 | -2.340941 |
| C | 4.409749  | 0.131627  | -0.245369 |
| C | 5.701035  | 0.862331  | 0.161444  |
| C | 6.203894  | 0.409872  | 1.541868  |
| C | 6.780592  | 0.641631  | -0.910415 |
| C | -3.803261 | -0.735285 | 1.046641  |
| C | -3.980569 | -1.838109 | 2.088563  |
| O | -5.149652 | -0.343830 | 0.711275  |
| H | -1.681220 | -0.643590 | 2.844114  |
| H | -1.212426 | 1.017334  | 2.600391  |
| H | -3.909466 | 2.191387  | 0.560370  |
| H | -2.183237 | 2.319734  | 0.747635  |
| H | -2.801996 | -0.478951 | -2.289030 |
| H | -3.773311 | -2.044453 | -0.658178 |
| H | -2.567352 | 1.650318  | -2.970528 |
| H | -0.865837 | -3.302539 | -1.653711 |
| H | -3.466347 | 3.935419  | -2.906087 |
| H | -4.636185 | 2.831630  | -2.167123 |
| H | -3.634039 | 3.884261  | -1.149555 |
| H | -0.956161 | 3.493239  | -2.703507 |
| H | -0.362609 | 2.051011  | -1.861856 |
| H | -1.057029 | 3.397395  | -0.942953 |
| H | 2.229652  | -2.402386 | -1.888172 |
| H | 1.869290  | 1.627431  | 1.892022  |
| H | 4.531852  | -0.953461 | -0.149080 |
| H | 4.199927  | 0.280409  | -1.313233 |

|   |           |           |           |
|---|-----------|-----------|-----------|
| H | 5.482390  | 1.935538  | 0.215630  |
| H | 7.116071  | 0.950382  | 1.818561  |
| H | 5.458543  | 0.592839  | 2.320521  |
| H | 6.443195  | -0.661671 | 1.536660  |
| H | 7.706358  | 1.163364  | -0.643934 |
| H | 6.457637  | 1.011919  | -1.890305 |
| H | 7.020389  | -0.423792 | -1.018872 |
| H | -4.432862 | -1.423144 | 2.994708  |
| H | -4.656115 | -2.601699 | 1.691894  |
| H | -3.035667 | -2.317040 | 2.347639  |
| H | -5.128247 | 0.222704  | -0.072843 |

**Conformer 13:**

|   |           |           |           |
|---|-----------|-----------|-----------|
| C | -1.812748 | -0.758691 | 0.625057  |
| C | -1.902189 | 0.335148  | -0.274860 |
| C | -0.749578 | 0.594292  | -1.098019 |
| C | 0.437477  | -0.185313 | -1.055201 |
| C | 0.480546  | -1.223386 | -0.132888 |
| C | -0.623848 | -1.535145 | 0.712974  |
| C | 1.526742  | 0.075780  | -2.079309 |
| C | 2.986685  | 0.226545  | -1.589591 |
| O | 1.558390  | -2.047887 | -0.008952 |
| C | 3.135946  | 1.356133  | -0.543613 |
| C | 2.928584  | 0.929692  | 0.896744  |
| C | 2.856943  | -0.371112 | 1.234987  |
| C | 2.902637  | -1.494271 | 0.236639  |
| C | 2.838487  | 2.013318  | 1.962555  |
| H | 3.569495  | 0.512843  | -2.473575 |
| C | -0.552756 | -2.617063 | 1.663931  |
| C | 4.076148  | 2.932702  | 1.975145  |
| C | 1.543424  | 2.842280  | 1.833096  |
| C | -3.075757 | 1.215240  | -0.408655 |
| O | -3.035344 | 2.172273  | -1.219116 |
| O | -2.837877 | -1.072196 | 1.416203  |
| O | -0.776385 | 1.602087  | -1.963555 |
| O | -1.493162 | -2.931122 | 2.423547  |
| C | -4.360730 | 1.030174  | 0.365203  |
| C | -5.299159 | -0.056451 | -0.233617 |
| C | -6.486874 | -0.279160 | 0.714177  |
| C | -5.779833 | 0.309646  | -1.645530 |
| C | 3.609772  | -1.087606 | -1.070444 |
| C | 3.609007  | -2.217634 | -2.098293 |
| O | 5.004089  | -0.886956 | -0.764226 |
| H | 1.490133  | -0.720359 | -2.833056 |
| H | 1.264171  | 0.993286  | -2.607737 |
| H | 4.135971  | 1.802021  | -0.630316 |
| H | 2.441376  | 2.168672  | -0.788826 |
| H | 2.719984  | -0.650688 | 2.278154  |
| H | 3.427246  | -2.358290 | 0.654108  |
| H | 2.800483  | 1.498455  | 2.931360  |
| H | 0.384520  | -3.185920 | 1.708026  |
| H | 4.018847  | 3.628690  | 2.818769  |
| H | 5.003278  | 2.357988  | 2.077689  |
| H | 4.145644  | 3.532009  | 1.060768  |
| H | 1.467013  | 3.550456  | 2.665286  |
| H | 0.656906  | 2.200930  | 1.851103  |
| H | 1.522707  | 3.423292  | 0.904814  |
| H | -2.543674 | -1.861735 | 1.977814  |
| H | -1.687586 | 2.047360  | -1.850270 |
| H | -4.143618 | 0.774990  | 1.403581  |
| H | -4.871479 | 1.998353  | 0.331606  |
| H | -4.735019 | -0.995024 | -0.287757 |
| H | -7.071823 | 0.641507  | 0.833996  |
| H | -7.158307 | -1.050576 | 0.320968  |
| H | -6.150108 | -0.598452 | 1.706187  |
| H | -6.425105 | -0.480540 | -2.045378 |
| H | -4.948482 | 0.448310  | -2.343645 |
| H | -6.358018 | 1.241618  | -1.634321 |
| H | 4.097076  | -1.882434 | -3.018771 |
| H | 4.178006  | -3.063780 | -1.701978 |
| H | 2.601052  | -2.561743 | -2.332885 |

H 5.078060 -0.311520 0.010147

**Conformer 15:**

C 1.638059 -1.373312 -0.421205  
C 1.863773 -0.349895 0.533712  
C 0.723052 0.099281 1.286054  
C -0.590894 -0.406457 1.098201  
C -0.760776 -1.380676 0.120625  
C 0.330054 -1.885661 -0.645248  
C -1.685186 0.038886 2.052533  
C -3.058691 0.467079 1.482642  
O -1.966000 -1.962176 -0.135577  
C -2.961452 1.657325 0.503216  
C -2.664594 1.279024 -0.931630  
C -2.782744 0.009418 -1.350330  
C -3.145119 -1.130650 -0.448417  
C -2.282191 2.385654 -1.903681  
H -3.635695 0.804730 2.355786  
C 0.128824 -2.898430 -1.652310  
C -3.354493 3.491257 -1.978022  
C -0.896877 2.986376 -1.587555  
C 3.178163 0.259705 0.806345  
O 3.278194 1.120770 1.710016  
O 2.650651 -1.868296 -1.132221  
O 0.881475 1.028564 2.225102  
O 1.052725 -3.380752 -2.340394  
C 4.427848 -0.124508 0.038748  
C 5.674662 0.718388 0.357590  
C 6.930795 0.004398 -0.167147  
C 5.571031 2.136951 -0.225561  
C -3.857341 -0.686844 0.841728  
C -4.109560 -1.867457 1.784443  
O -5.128691 -0.187963 0.373677  
H -1.846352 -0.761122 2.786698  
H -1.294871 0.882513 2.623454  
H -3.913797 2.201593 0.511335  
H -2.206640 2.363706 0.869696  
H -2.587499 -0.241375 -2.391357  
H -3.792903 -1.842223 -0.967561  
H -2.217866 1.922596 -2.897049  
H -0.897645 -3.253256 -1.808851  
H -3.100582 4.210618 -2.764223  
H -4.341503 3.074555 -2.204368  
H -3.427521 4.047099 -1.036523  
H -0.620745 3.719580 -2.353437  
H -0.123505 2.212192 -1.564529  
H -0.887669 3.502542 -0.621268  
H 2.259274 -2.566329 -1.751217  
H 1.870860 1.260970 2.228837  
H 4.614491 -1.186623 0.247672  
H 4.208295 -0.101292 -1.034879  
H 5.756871 0.805562 1.447580  
H 7.832092 0.584507 0.059742  
H 7.048606 -0.987603 0.284041  
H 6.887035 -0.127405 -1.255801  
H 6.462065 2.724511 0.022801  
H 4.700315 2.669320 0.166640  
H 5.492061 2.102731 -1.320188  
H -4.598691 -1.520468 2.703703  
H -4.769824 -2.590072 1.294342  
H -3.191075 -2.385553 2.063683  
H -5.722472 -0.106297 1.132034

**Conformer 16:**

C -1.620438 -1.375132 0.421271  
C -1.851181 -0.359304 -0.540748  
C -0.714584 0.084567 -1.302375  
C 0.599488 -0.422508 -1.118844  
C 0.774699 -1.386203 -0.132686  
C -0.311102 -1.885436 0.643650  
C 1.695363 0.010284 -2.075801

|   |           |           |           |
|---|-----------|-----------|-----------|
| C | 3.048608  | 0.482140  | -1.492160 |
| O | 1.983466  | -1.962408 | 0.120572  |
| C | 2.878427  | 1.665964  | -0.511409 |
| C | 2.640732  | 1.273818  | 0.934089  |
| C | 2.805057  | 0.003521  | 1.347349  |
| C | 3.161382  | -1.131412 | 0.427930  |
| C | 2.243473  | 2.364028  | 1.919955  |
| H | 3.633341  | 0.840891  | -2.347986 |
| C | -0.104902 | -2.892216 | 1.655896  |
| C | 3.262571  | 3.520177  | 1.963259  |
| C | 0.822225  | 2.898496  | 1.645188  |
| C | -3.167404 | 0.248111  | -0.811871 |
| O | -3.270281 | 1.105033  | -1.718920 |
| O | -2.629366 | -1.863884 | 1.141620  |
| O | -0.876022 | 1.010101  | -2.244226 |
| O | -1.024808 | -3.367568 | 2.353695  |
| C | -4.414621 | -0.134404 | -0.039708 |
| C | -5.664463 | 0.702696  | -0.362105 |
| C | -6.917646 | -0.011908 | 0.168791  |
| C | -5.564483 | 2.125202  | 0.212046  |
| C | 3.878949  | -0.649044 | -0.847254 |
| C | 4.193420  | -1.801458 | -1.799301 |
| O | 5.173053  | -0.150216 | -0.453753 |
| H | 1.883643  | -0.809855 | -2.779555 |
| H | 1.297988  | 0.828304  | -2.678225 |
| H | 3.771596  | 2.303861  | -0.553189 |
| H | 2.057361  | 2.305477  | -0.857447 |
| H | 2.640034  | -0.249299 | 2.393284  |
| H | 3.813491  | -1.847152 | 0.936402  |
| H | 2.230263  | 1.898761  | 2.914167  |
| H | 0.921819  | -3.249135 | 1.806701  |
| H | 2.994848  | 4.227958  | 2.754947  |
| H | 4.275427  | 3.156137  | 2.168109  |
| H | 3.284529  | 4.077125  | 1.020167  |
| H | 0.533935  | 3.613940  | 2.422971  |
| H | 0.086629  | 2.088280  | 1.639945  |
| H | 0.761568  | 3.417869  | 0.682722  |
| H | -2.235594 | -2.557122 | 1.764078  |
| H | -1.865571 | 1.242582  | -2.245471 |
| H | -4.598429 | -1.198466 | -0.241174 |
| H | -4.193386 | -0.103412 | 1.033397  |
| H | -5.748414 | 0.782760  | -1.452493 |
| H | -7.820980 | 0.563936  | -0.060685 |
| H | -7.032939 | -1.007075 | -0.275973 |
| H | -6.872156 | -0.136624 | 1.258207  |
| H | -6.457721 | 2.708314  | -0.038722 |
| H | -4.696093 | 2.657965  | -0.184780 |
| H | -5.484013 | 2.098046  | 1.306777  |
| H | 4.680627  | -1.415805 | -2.700278 |
| H | 4.885350  | -2.493107 | -1.309754 |
| H | 3.299260  | -2.356175 | -2.085993 |
| H | 5.063819  | 0.462672  | 0.286973  |

**Conformer 17:**

|   |           |           |           |
|---|-----------|-----------|-----------|
| C | -1.565135 | -1.227101 | 0.403655  |
| C | -1.842047 | -0.079007 | -0.381079 |
| C | -0.749654 | 0.468860  | -1.139308 |
| C | 0.554108  | -0.094868 | -1.156827 |
| C | 0.773715  | -1.207756 | -0.353840 |
| C | -0.260514 | -1.793757 | 0.432439  |
| C | 1.583964  | 0.462375  | -2.122656 |
| C | 2.996314  | 0.800207  | -1.588591 |
| O | 1.976422  | -1.846404 | -0.300792 |
| C | 2.947821  | 1.805034  | -0.415866 |
| C | 2.821755  | 1.190215  | 0.964990  |
| C | 2.977017  | -0.132739 | 1.154574  |
| C | 3.207478  | -1.106759 | 0.031035  |
| C | 2.548283  | 2.173672  | 2.096386  |
| H | 3.523275  | 1.282418  | -2.420994 |
| C | -0.003814 | -2.940246 | 1.269230  |
| C | 1.053003  | 2.565343  | 2.131935  |



|   |           |           |           |
|---|-----------|-----------|-----------|
| C | 3.006839  | 1.698241  | 3.483014  |
| C | -3.163359 | 0.569506  | -0.471659 |
| O | -3.288756 | 1.608106  | -1.159676 |
| O | -2.521449 | -1.782948 | 1.146806  |
| O | -0.947308 | 1.550512  | -1.888431 |
| O | -0.875549 | -3.487833 | 1.975987  |
| C | -4.384339 | 0.032840  | 0.248938  |
| C | -5.704436 | 0.751304  | -0.079783 |
| C | -6.203720 | 0.411869  | -1.493526 |
| C | -6.765495 | 0.392720  | 0.973108  |
| C | 3.833986  | -0.440179 | -1.208469 |
| C | 4.024708  | -1.429472 | -2.356624 |
| O | 5.174136  | -0.042719 | -0.855791 |
| H | 1.683554  | -0.236318 | -2.962420 |
| H | 1.169975  | 1.377112  | -2.549104 |
| H | 3.855849  | 2.425668  | -0.421902 |
| H | 2.124230  | 2.511694  | -0.576942 |
| H | 2.907646  | -0.558699 | 2.151544  |
| H | 3.871108  | -1.913238 | 0.355365  |
| H | 3.114594  | 3.086273  | 1.855829  |
| H | 1.017899  | -3.340724 | 1.271930  |
| H | 0.885002  | 3.352706  | 2.874599  |
| H | 0.698835  | 2.937634  | 1.166117  |
| H | 0.437716  | 1.701902  | 2.407311  |
| H | 2.874973  | 2.501409  | 4.215398  |
| H | 4.062847  | 1.409021  | 3.483959  |
| H | 2.419375  | 0.842116  | 3.832864  |
| H | -2.100507 | -2.568119 | 1.625799  |
| H | -1.920226 | 1.813073  | -1.754583 |
| H | -4.469113 | -1.042314 | 0.053105  |
| H | -4.169395 | 0.089666  | 1.324644  |
| H | -5.524386 | 1.832045  | -0.034533 |
| H | -7.136969 | 0.942552  | -1.713011 |
| H | -5.472558 | 0.693557  | -2.256031 |
| H | -6.404813 | -0.663423 | -1.587344 |
| H | -7.711534 | 0.903381  | 0.762173  |
| H | -6.446692 | 0.681341  | 1.981404  |
| H | -6.966520 | -0.686111 | 0.982805  |
| H | 4.448849  | -0.913799 | -3.223840 |
| H | 4.728893  | -2.207446 | -2.047324 |
| H | 3.089609  | -1.909163 | -2.648068 |
| H | 5.149651  | 0.444271  | -0.020024 |

# Conformer 21:

|   |           |           |           |
|---|-----------|-----------|-----------|
| C | -1.740765 | -0.791609 | 0.555173  |
| C | -1.882219 | 0.340098  | -0.289255 |
| C | -0.751305 | 0.681029  | -1.112474 |
| C | 0.462979  | -0.056527 | -1.123750 |
| C | 0.556815  | -1.134920 | -0.252868 |
| C | -0.523331 | -1.526825 | 0.591113  |
| C | 1.526822  | 0.292771  | -2.148521 |
| C | 2.987564  | 0.471283  | -1.670582 |
| O | 1.664547  | -1.925084 | -0.182767 |
| C | 3.110044  | 1.547338  | -0.568539 |
| C | 2.945146  | 1.045969  | 0.853511  |
| C | 2.928186  | -0.270713 | 1.129688  |
| C | 2.992826  | -1.337623 | 0.070800  |
| C | 2.840058  | 2.128441  | 1.920833  |
| H | 3.547835  | 0.822750  | -2.545595 |
| C | -0.399222 | -2.649353 | 1.488094  |
| C | 1.412594  | 2.721079  | 1.960631  |
| C | 3.271719  | 1.685513  | 3.326709  |
| C | -3.088496 | 1.181955  | -0.365592 |
| O | -3.092761 | 2.179673  | -1.126453 |
| O | -2.743060 | -1.180024 | 1.342488  |
| O | -0.825864 | 1.729497  | -1.925680 |
| O | -1.316353 | -3.034092 | 2.243625  |
| C | -4.355974 | 0.911046  | 0.411910  |
| C | -5.261713 | -0.178925 | -0.229601 |
| C | -6.429207 | -0.490609 | 0.718264  |
| C | -5.772251 | 0.237372  | -1.616921 |

|   |           |           |           |
|---|-----------|-----------|-----------|
| C | 3.664037  | -0.843572 | -1.224625 |
| C | 3.686553  | -1.922035 | -2.306225 |
| O | 5.055257  | -0.608192 | -0.928997 |
| H | 1.506586  | -0.466370 | -2.940127 |
| H | 1.224542  | 1.225132  | -2.627412 |
| H | 4.092447  | 2.037261  | -0.636573 |
| H | 2.383999  | 2.347365  | -0.759522 |
| H | 2.832869  | -0.617878 | 2.154666  |
| H | 3.552841  | -2.203440 | 0.435117  |
| H | 3.516313  | 2.938167  | 1.607045  |
| H | 0.558945  | -3.184113 | 1.493252  |
| H | 1.373535  | 3.569538  | 2.652199  |
| H | 1.083559  | 3.075964  | 0.979521  |
| H | 0.695192  | 1.968555  | 2.305584  |
| H | 3.270428  | 2.544657  | 4.005466  |
| H | 4.278997  | 1.256320  | 3.325513  |
| H | 2.585403  | 0.941380  | 3.745889  |
| H | -2.413199 | -1.984059 | 1.861635  |
| H | -1.750695 | 2.135232  | -1.779075 |
| H | -4.116237 | 0.613459  | 1.433920  |
| H | -4.902204 | 1.860051  | 0.432203  |
| H | -4.664861 | -1.092533 | -0.335398 |
| H | -7.076946 | -1.266272 | 0.294828  |
| H | -6.069343 | -0.844833 | 1.690108  |
| H | -7.045565 | 0.401137  | 0.888650  |
| H | -6.393303 | -0.555592 | -2.048372 |
| H | -4.954855 | 0.440185  | -2.315820 |
| H | -6.383566 | 1.145859  | -1.554156 |
| H | 4.147235  | -1.525150 | -3.216239 |
| H | 4.291688  | -2.765164 | -1.960217 |
| H | 2.687771  | -2.290694 | -2.542673 |
| H | 5.121307  | -0.068231 | -0.128778 |

**Conformer 23:**

|   |           |           |           |
|---|-----------|-----------|-----------|
| C | 1.543848  | 1.348605  | 0.428825  |
| C | 1.817172  | 0.377366  | -0.567384 |
| C | 0.703358  | -0.073717 | -1.357733 |
| C | -0.627868 | 0.385551  | -1.172282 |
| C | -0.844580 | 1.304803  | -0.152545 |
| C | 0.216490  | 1.808242  | 0.654833  |
| C | -1.698894 | -0.044928 | -2.157994 |
| C | -3.042138 | -0.580134 | -1.607044 |
| O | -2.073339 | 1.833304  | 0.107604  |
| C | -2.842697 | -1.786904 | -0.662904 |
| C | -2.640319 | -1.443482 | 0.800630  |
| C | -2.853943 | -0.196720 | 1.258957  |
| C | -3.229518 | 0.957144  | 0.369323  |
| C | -2.220642 | -2.604932 | 1.693227  |
| H | -3.606313 | -0.928387 | -2.480836 |
| C | -0.032534 | 2.769257  | 1.701273  |
| C | -0.706884 | -2.885138 | 1.550228  |
| C | -2.594188 | -2.442039 | 3.174108  |
| C | 3.154622  | -0.178527 | -0.844566 |
| O | 3.294065  | -0.998706 | -1.780329 |
| O | 2.528919  | 1.841654  | 1.178717  |
| O | 0.903885  | -0.959969 | -2.329594 |
| O | 0.864180  | 3.246701  | 2.427346  |
| C | 4.381023  | 0.214657  | -0.044928 |
| C | 5.659988  | -0.570807 | -0.382700 |
| C | 6.884541  | 0.163349  | 0.186915  |
| C | 5.599368  | -2.015227 | 0.139928  |
| C | -3.915536 | 0.499857  | -0.931935 |
| C | -4.255440 | 1.676435  | -1.844940 |
| O | -5.197778 | -0.053692 | -0.574232 |
| H | -1.905371 | 0.794613  | -2.833189 |
| H | -1.269534 | -0.827312 | -2.785309 |
| H | -3.711955 | -2.457451 | -0.730048 |
| H | -1.996397 | -2.389063 | -1.016373 |
| H | -2.728180 | 0.032182  | 2.313465  |
| H | -3.909326 | 1.636115  | 0.891674  |
| H | -2.749791 | -3.492603 | 1.314489  |

|   |           |           |           |
|---|-----------|-----------|-----------|
| H | -1.071653 | 3.087881  | 1.852936  |
| H | -0.433829 | -3.787384 | 2.107981  |
| H | -0.409968 | -3.035145 | 0.508016  |
| H | -0.123513 | -2.048786 | 1.950402  |
| H | -2.356870 | -3.359817 | 3.722037  |
| H | -3.662008 | -2.237152 | 3.302934  |
| H | -2.032423 | -1.628823 | 3.646933  |
| H | 2.106578  | 2.498146  | 1.821937  |
| H | 1.900476  | -1.160741 | -2.327763 |
| H | 4.533083  | 1.290540  | -0.206050 |
| H | 4.149765  | 0.137936  | 1.023745  |
| H | 5.757349  | -0.609429 | -1.474224 |
| H | 7.807892  | -0.375479 | -0.052584 |
| H | 6.972746  | 1.176791  | -0.221280 |
| H | 6.824218  | 0.247838  | 1.279470  |
| H | 6.512993  | -2.560910 | -0.121412 |
| H | 4.752148  | -2.560387 | -0.284848 |
| H | 5.507309  | -2.029459 | 1.233989  |
| H | -4.717344 | 1.309256  | -2.766733 |
| H | -4.976591 | 2.326006  | -1.340181 |
| H | -3.376536 | 2.270652  | -2.097587 |
| H | -5.077794 | -0.690240 | 0.144562  |

**Conformer 30:**

|   |           |           |           |
|---|-----------|-----------|-----------|
| C | -1.831268 | -0.661664 | 0.663040  |
| C | -1.943797 | 0.354301  | -0.321349 |
| C | -0.811817 | 0.544101  | -1.190761 |
| C | 0.376784  | -0.230253 | -1.112480 |
| C | 0.444365  | -1.186908 | -0.107417 |
| C | -0.638906 | -1.427869 | 0.787261  |
| C | 1.440462  | -0.058808 | -2.181288 |
| C | 2.911003  | 0.137573  | -1.741393 |
| O | 1.528982  | -1.994814 | 0.060510  |
| C | 3.079096  | 1.351550  | -0.799315 |
| C | 2.897834  | 1.056003  | 0.679107  |
| C | 2.834492  | -0.210506 | 1.129581  |
| C | 2.874418  | -1.414709 | 0.228812  |
| C | 2.821023  | 2.271724  | 1.595310  |
| H | 3.471977  | 0.347505  | -2.660246 |
| C | -0.542354 | -2.426588 | 1.823183  |
| C | 2.344039  | 1.970323  | 3.022874  |
| C | 4.165762  | 3.033947  | 1.634062  |
| C | -3.121458 | 1.221022  | -0.498951 |
| O | -3.101237 | 2.108902  | -1.385224 |
| O | -2.837317 | -0.908968 | 1.500919  |
| O | -0.860877 | 1.477104  | -2.135738 |
| O | -1.463652 | -2.677463 | 2.628320  |
| C | -4.387227 | 1.100780  | 0.318257  |
| C | -5.339050 | -0.029917 | -0.167024 |
| C | -6.503012 | -0.173876 | 0.824500  |
| C | -5.854448 | 0.220798  | -1.591840 |
| C | 3.552165  | -1.123479 | -1.122689 |
| C | 3.536704  | -2.339227 | -2.047219 |
| O | 4.951418  | -0.891652 | -0.864202 |
| H | 1.389147  | -0.918780 | -2.860377 |
| H | 1.162070  | 0.807953  | -2.782284 |
| H | 4.074010  | 1.790473  | -0.951044 |
| H | 2.373089  | 2.140165  | -1.091470 |
| H | 2.700530  | -0.413243 | 2.187957  |
| H | 3.413045  | -2.235600 | 0.710690  |
| H | 2.082520  | 2.947334  | 1.137202  |
| H | 0.397766  | -2.988261 | 1.892645  |
| H | 2.218356  | 2.905966  | 3.577175  |
| H | 1.383689  | 1.445391  | 3.028691  |
| H | 3.070616  | 1.361241  | 3.572935  |
| H | 4.073030  | 3.932982  | 2.252296  |
| H | 4.494234  | 3.351105  | 0.640124  |
| H | 4.952048  | 2.406448  | 2.070193  |
| H | -2.528813 | -1.649054 | 2.118874  |
| H | -1.769143 | 1.931086  | -2.037524 |
| H | -4.144512 | 0.930948  | 1.368396  |

|   |           |           |           |
|---|-----------|-----------|-----------|
| H | -4.899594 | 2.063546  | 0.218510  |
| H | -4.775697 | -0.970491 | -0.158672 |
| H | -7.182900 | -0.974201 | 0.511863  |
| H | -6.141659 | -0.411749 | 1.830626  |
| H | -7.086033 | 0.753904  | 0.883459  |
| H | -6.507903 | -0.598970 | -1.910618 |
| H | -5.040396 | 0.302257  | -2.318761 |
| H | -6.433730 | 1.150803  | -1.642090 |
| H | 4.007947  | -2.084851 | -3.001726 |
| H | 4.114616  | -3.147088 | -1.588760 |
| H | 2.525712  | -2.703347 | -2.233510 |
| H | 5.038590  | -0.248261 | -0.146790 |

**Conformer 31:**

|   |           |           |           |
|---|-----------|-----------|-----------|
| C | -1.778435 | -1.315336 | 0.228731  |
| C | -1.886787 | -0.424920 | -0.870989 |
| C | -0.663253 | -0.071358 | -1.542761 |
| C | 0.614118  | -0.560664 | -1.158230 |
| C | 0.663075  | -1.404898 | -0.055814 |
| C | -0.509988 | -1.802525 | 0.650158  |
| C | 1.814429  | -0.247754 | -2.033242 |
| C | 3.107760  | 0.276004  | -1.364571 |
| O | 1.825277  | -1.955677 | 0.394108  |
| C | 2.860558  | 1.567434  | -0.550261 |
| C | 2.460682  | 1.348120  | 0.895934  |
| C | 2.552333  | 0.133066  | 1.467519  |
| C | 2.980797  | -1.104293 | 0.728700  |
| C | 1.983948  | 2.549056  | 1.701380  |
| H | 3.787726  | 0.527273  | -2.187707 |
| C | -0.431160 | -2.678382 | 1.793319  |
| C | 3.017092  | 3.693282  | 1.722383  |
| C | 0.612014  | 3.060571  | 1.214348  |
| C | -3.154961 | 0.122469  | -1.382669 |
| O | -3.137065 | 0.879876  | -2.382772 |
| O | -2.863425 | -1.699916 | 0.899595  |
| O | -0.704762 | 0.740674  | -2.593648 |
| O | -1.428681 | -3.058981 | 2.441456  |
| C | -4.504880 | -0.158570 | -0.763217 |
| C | -4.815538 | 0.716278  | 0.484675  |
| C | -4.890152 | 2.210619  | 0.138041  |
| C | -6.122352 | 0.233494  | 1.131069  |
| C | 3.840097  | -0.780103 | -0.508210 |
| C | 4.229006  | -2.038201 | -1.282418 |
| O | 5.095475  | -0.250920 | -0.036796 |
| H | 2.059605  | -1.144066 | -2.616260 |
| H | 1.499720  | 0.499614  | -2.762883 |
| H | 3.767559  | 2.186715  | -0.566780 |
| H | 2.096478  | 2.171121  | -1.054808 |
| H | 2.271143  | 0.005173  | 2.511413  |
| H | 3.560049  | -1.761186 | 1.383711  |
| H | 1.854508  | 2.202710  | 2.735017  |
| H | 0.566582  | -3.020697 | 2.095521  |
| H | 2.681379  | 4.490723  | 2.393776  |
| H | 3.994173  | 3.346603  | 2.076624  |
| H | 3.151791  | 4.136456  | 0.729644  |
| H | 0.257697  | 3.864362  | 1.868788  |
| H | -0.135921 | 2.261770  | 1.222466  |
| H | 0.665582  | 3.464629  | 0.197677  |
| H | -2.548278 | -2.318211 | 1.636787  |
| H | -1.688860 | 0.970385  | -2.734466 |
| H | -5.242145 | 0.060259  | -1.542879 |
| H | -4.580294 | -1.210700 | -0.484196 |
| H | -4.008383 | 0.564512  | 1.211167  |
| H | -5.091438 | 2.801693  | 1.038560  |
| H | -3.960343 | 2.580297  | -0.305334 |
| H | -5.696119 | 2.407303  | -0.579356 |
| H | -6.358299 | 0.827261  | 2.021223  |
| H | -6.052023 | -0.816462 | 1.434350  |
| H | -6.964289 | 0.329977  | 0.434000  |
| H | 4.819365  | -1.764295 | -2.162358 |
| H | 4.848002  | -2.675748 | -0.644322 |

|   |          |           |           |
|---|----------|-----------|-----------|
| H | 3.358648 | -2.613119 | -1.600857 |
| H | 4.921425 | 0.444872  | 0.612679  |

**Conformer 32:**

|   |           |           |           |
|---|-----------|-----------|-----------|
| C | 1.632077  | 1.303975  | 0.655900  |
| C | 1.952867  | 0.320918  | -0.314804 |
| C | 0.889592  | -0.098523 | -1.188762 |
| C | -0.432256 | 0.417555  | -1.121150 |
| C | -0.697330 | 1.353290  | -0.128765 |
| C | 0.309725  | 1.818067  | 0.765680  |
| C | -1.433609 | 0.022744  | -2.191315 |
| C | -2.838167 | -0.457837 | -1.754463 |
| O | -1.923219 | 1.929347  | 0.023892  |
| C | -2.767406 | -1.669371 | -0.797101 |
| C | -2.659391 | -1.325748 | 0.678001  |
| C | -2.852705 | -0.066664 | 1.111865  |
| C | -3.126117 | 1.094248  | 0.194876  |
| C | -2.350401 | -2.491054 | 1.610744  |
| H | -3.339651 | -0.786796 | -2.672820 |
| C | 0.009077  | 2.790808  | 1.787308  |
| C | -1.945699 | -2.083519 | 3.034273  |
| C | -3.521721 | -3.499248 | 1.658900  |
| C | 3.291030  | -0.280046 | -0.486802 |
| O | 3.461552  | -1.138222 | -1.382279 |
| O | 2.563774  | 1.754487  | 1.495644  |
| O | 1.131946  | -1.005708 | -2.131096 |
| O | 0.856619  | 3.232148  | 2.591282  |
| C | 4.464778  | 0.109958  | 0.389087  |
| C | 5.818446  | -0.584156 | 0.126824  |
| C | 5.791483  | -2.097944 | 0.398614  |
| C | 6.415706  | -0.257116 | -1.252440 |
| C | -3.722755 | 0.657010  | -1.155476 |
| C | -3.943850 | 1.840002  | -2.096027 |
| O | -5.049322 | 0.153191  | -0.900509 |
| H | -1.550889 | 0.866426  | -2.882595 |
| H | -0.984109 | -0.778657 | -2.779194 |
| H | -3.653638 | -2.299851 | -0.947631 |
| H | -1.916198 | -2.304772 | -1.075358 |
| H | -2.769393 | 0.171548  | 2.168058  |
| H | -3.821380 | 1.796487  | 0.663614  |
| H | -1.493308 | -3.016508 | 1.162477  |
| H | -1.025089 | 3.153178  | 1.846045  |
| H | -1.640460 | -2.969010 | 3.601055  |
| H | -1.107140 | -1.380150 | 3.033094  |
| H | -2.779080 | -1.621718 | 3.576171  |
| H | -3.257892 | -4.355996 | 2.287786  |
| H | -3.780191 | -3.885578 | 0.668753  |
| H | -4.415725 | -3.030988 | 2.087468  |
| H | 2.112169  | 2.429228  | 2.099337  |
| H | 2.113328  | -1.254128 | -2.037540 |
| H | 4.582900  | 1.197888  | 0.312705  |
| H | 4.161975  | -0.045637 | 1.431889  |
| H | 6.490383  | -0.140128 | 0.875991  |
| H | 6.806241  | -2.509787 | 0.356307  |
| H | 5.389205  | -2.314397 | 1.395843  |
| H | 5.180465  | -2.625084 | -0.338386 |
| H | 7.440386  | -0.639455 | -1.323116 |
| H | 6.455575  | 0.826025  | -1.420156 |
| H | 5.829506  | -0.706143 | -2.058045 |
| H | -4.347518 | 1.485079  | -3.049413 |
| H | -4.675091 | 2.521335  | -1.651170 |
| H | -3.024765 | 2.396826  | -2.281994 |
| H | -5.011663 | -0.485287 | -0.174450 |

**Conformer 35:**

|   |           |           |           |
|---|-----------|-----------|-----------|
| C | -1.658402 | -1.286812 | 0.515878  |
| C | -1.900863 | -0.373466 | -0.541227 |
| C | -0.776405 | -0.020298 | -1.365744 |
| C | 0.537700  | -0.516012 | -1.154169 |
| C | 0.726217  | -1.370981 | -0.074791 |
| C | -0.347901 | -1.780720 | 0.767223  |

|   |           |           |           |
|---|-----------|-----------|-----------|
| C | 1.619259  | -0.195836 | -2.169838 |
| C | 2.982064  | 0.332668  | -1.662017 |
| O | 1.938629  | -1.920194 | 0.218724  |
| C | 2.828528  | 1.613770  | -0.810686 |
| C | 2.603624  | 1.383925  | 0.673325  |
| C | 2.767518  | 0.164405  | 1.218086  |
| C | 3.119812  | -1.060769 | 0.419337  |
| C | 2.214759  | 2.614290  | 1.484731  |
| H | 3.553932  | 0.595101  | -2.560434 |
| C | -0.128895 | -2.679700 | 1.873781  |
| C | 1.696050  | 2.313220  | 2.897753  |
| C | 3.374535  | 3.634777  | 1.549928  |
| C | -3.217441 | 0.215885  | -0.847558 |
| O | -3.332720 | 0.974435  | -1.836988 |
| O | -2.656852 | -1.691962 | 1.299921  |
| O | -0.949988 | 0.803853  | -2.395574 |
| O | -1.038690 | -3.074334 | 2.632576  |
| C | -4.450565 | -0.069614 | -0.013263 |
| C | -5.697959 | 0.747596  | -0.391296 |
| C | -6.946395 | 0.108353  | 0.237747  |
| C | -5.567658 | 2.219527  | 0.032512  |
| C | 3.821023  | -0.722464 | -0.909097 |
| C | 4.123307  | -1.972261 | -1.733473 |
| O | 5.120176  | -0.185529 | -0.588877 |
| H | 1.795027  | -1.089743 | -2.780933 |
| H | 1.214414  | 0.552270  | -2.852784 |
| H | 3.720772  | 2.240744  | -0.938695 |
| H | 1.999284  | 2.216088  | -1.204755 |
| H | 2.600003  | 0.007500  | 2.279492  |
| H | 3.778631  | -1.716744 | 0.995422  |
| H | 1.395376  | 3.095129  | 0.928815  |
| H | 0.898368  | -3.026999 | 2.042504  |
| H | 1.342032  | 3.236501  | 3.367576  |
| H | 0.862987  | 1.603509  | 2.882383  |
| H | 2.483763  | 1.902716  | 3.539947  |
| H | 3.056987  | 4.534684  | 2.087001  |
| H | 3.711861  | 3.946379  | 0.557169  |
| H | 4.232099  | 3.209725  | 2.084801  |
| H | -2.255580 | -2.320283 | 1.983472  |
| H | -1.937835 | 1.042877  | -2.403061 |
| H | -4.651021 | -1.145990 | -0.101673 |
| H | -4.204109 | 0.066863  | 1.046032  |
| H | -5.806808 | 0.717607  | -1.481993 |
| H | -6.876339 | 0.094270  | 1.332888  |
| H | -7.848129 | 0.670637  | -0.028690 |
| H | -7.083990 | -0.925096 | -0.100632 |
| H | -6.459586 | 2.786791  | -0.256375 |
| H | -4.702668 | 2.696947  | -0.435839 |
| H | -5.461595 | 2.302634  | 1.122242  |
| H | 4.599106  | -1.687881 | -2.677185 |
| H | 4.821106  | -2.607715 | -1.180216 |
| H | 3.225246  | -2.553129 | -1.946506 |
| H | 5.020759  | 0.507566  | 0.078911  |

**Conformer 36:**

|   |           |           |           |
|---|-----------|-----------|-----------|
| C | 1.827331  | -1.215453 | -0.435722 |
| C | 1.941164  | -0.562842 | 0.819098  |
| C | 0.722361  | -0.363842 | 1.559651  |
| C | -0.556709 | -0.769839 | 1.093186  |
| C | -0.612128 | -1.373745 | -0.157497 |
| C | 0.557364  | -1.615507 | -0.936453 |
| C | -1.745832 | -0.647300 | 2.029776  |
| C | -3.067591 | -0.041484 | 1.500610  |
| O | -1.775599 | -1.823636 | -0.705071 |
| C | -2.903488 | 1.400052  | 0.973646  |
| C | -2.450342 | 1.509939  | -0.467890 |
| C | -2.498084 | 0.446700  | -1.285479 |
| C | -2.933867 | -0.917644 | -0.842837 |
| C | -1.991083 | 2.890999  | -0.917578 |
| H | -3.731937 | -0.000191 | 2.375983  |
| C | 0.472271  | -2.242066 | -2.232559 |

|   |           |           |           |
|---|-----------|-----------|-----------|
| C | -1.300784 | 2.922403  | -2.288165 |
| C | -3.157991 | 3.904834  | -0.886911 |
| C | 3.209888  | -0.113110 | 1.416004  |
| O | 3.199661  | 0.417496  | 2.553068  |
| O | 2.908210  | -1.452870 | -1.177898 |
| O | 0.771115  | 0.212978  | 2.756073  |
| O | 1.466174  | -2.481560 | -2.950435 |
| C | 4.551634  | -0.229128 | 0.729294  |
| C | 4.813549  | 0.884672  | -0.324042 |
| C | 4.852973  | 2.282475  | 0.311102  |
| C | 6.120345  | 0.580486  | -1.071285 |
| C | -3.777194 | -0.912316 | 0.443533  |
| C | -4.096307 | -2.332826 | 0.919147  |
| O | -5.006641 | -0.271710 | 0.040512  |
| H | -1.958974 | -1.641239 | 2.444133  |
| H | -1.429130 | -0.040193 | 2.878972  |
| H | -3.865186 | 1.918559  | 1.065967  |
| H | -2.201189 | 1.945335  | 1.618293  |
| H | -2.180471 | 0.525411  | -2.320799 |
| H | -3.513991 | -1.409753 | -1.628249 |
| H | -1.254498 | 3.225787  | -0.170614 |
| H | -0.526967 | -2.518048 | -2.592005 |
| H | -0.918321 | 3.928534  | -2.488972 |
| H | -0.456706 | 2.226980  | -2.334769 |
| H | -1.996690 | 2.670315  | -3.096584 |
| H | -2.801657 | 4.900721  | -1.171482 |
| H | -3.609967 | 3.986839  | 0.105763  |
| H | -3.942300 | 3.609140  | -1.592919 |
| H | 2.588603  | -1.912032 | -2.021929 |
| H | 1.755007  | 0.416741  | 2.932048  |
| H | 5.301191  | -0.150715 | 1.523868  |
| H | 4.644301  | -1.202138 | 0.244261  |
| H | 3.996817  | 0.854937  | -1.054959 |
| H | 5.022139  | 3.045876  | -0.456632 |
| H | 3.920756  | 2.528603  | 0.829079  |
| H | 5.665268  | 2.358019  | 1.044204  |
| H | 6.321585  | 1.345194  | -1.829808 |
| H | 6.073702  | -0.390795 | -1.575116 |
| H | 6.973022  | 0.564205  | -0.380768 |
| H | -4.680943 | -2.298722 | 1.847442  |
| H | -4.689709 | -2.847657 | 0.156824  |
| H | -3.199234 | -2.925078 | 1.104866  |
| H | -5.672754 | -0.432980 | 0.722149  |

#### Conformer 38:

|   |           |           |           |
|---|-----------|-----------|-----------|
| C | 1.691650  | 1.272975  | 0.419528  |
| C | 1.842417  | 0.605197  | -0.823516 |
| C | 0.638737  | 0.339637  | -1.567614 |
| C | -0.659262 | 0.704447  | -1.119271 |
| C | -0.749235 | 1.327198  | 0.119539  |
| C | 0.402356  | 1.628993  | 0.904200  |
| C | -1.839880 | 0.514362  | -2.054405 |
| C | -3.116140 | -0.170556 | -1.510233 |
| O | -1.934672 | 1.743650  | 0.646298  |
| C | -2.821755 | -1.574397 | -0.935709 |
| C | -2.449687 | -1.612617 | 0.534221  |
| C | -2.597160 | -0.528905 | 1.317733  |
| C | -3.061290 | 0.806216  | 0.802003  |
| C | -1.942527 | -2.955318 | 1.045876  |
| H | -3.779970 | -0.295153 | -2.374456 |
| C | 0.281338  | 2.276017  | 2.187507  |
| C | -0.458601 | -3.160921 | 0.663891  |
| C | -2.140929 | -3.183351 | 2.551769  |
| C | 3.133951  | 0.203022  | -1.406159 |
| O | 3.152839  | -0.355426 | -2.529603 |
| O | 2.755859  | 1.565121  | 1.166095  |
| O | 0.719318  | -0.263495 | -2.748999 |
| O | 1.258412  | 2.564968  | 2.909933  |
| C | 4.466545  | 0.404421  | -0.721637 |
| C | 4.788948  | -0.675567 | 0.350160  |
| C | 4.913402  | -2.078295 | -0.262744 |

|   |           |           |           |
|---|-----------|-----------|-----------|
| C | 6.072498  | -0.283375 | 1.096713  |
| C | -3.895749 | 0.683764  | -0.486956 |
| C | -4.324921 | 2.047989  | -1.023756 |
| O | -5.134506 | 0.032605  | -0.140765 |
| H | -2.115101 | 1.492826  | -2.466984 |
| H | -1.491291 | -0.074630 | -2.903857 |
| H | -3.699588 | -2.222609 | -1.073499 |
| H | -2.027594 | -2.049204 | -1.525305 |
| H | -2.349224 | -0.574497 | 2.374459  |
| H | -3.670838 | 1.314565  | 1.554363  |
| H | -2.521509 | -3.726674 | 0.515596  |
| H | -0.730914 | 2.522190  | 2.532123  |
| H | -0.132691 | -4.170007 | 0.938149  |
| H | -0.285732 | -3.035219 | -0.409029 |
| H | 0.175968  | -2.442897 | 1.194619  |
| H | -1.851833 | -4.205911 | 2.815692  |
| H | -3.184481 | -3.038823 | 2.849955  |
| H | -1.519682 | -2.507225 | 3.149592  |
| H | 2.411728  | 2.025192  | 1.999662  |
| H | 1.712683  | -0.428005 | -2.915324 |
| H | 5.219945  | 0.353994  | -1.514830 |
| H | 4.505159  | 1.389081  | -0.253169 |
| H | 3.968822  | -0.682230 | 1.077897  |
| H | 5.122758  | -2.818539 | 0.517650  |
| H | 4.000324  | -2.386501 | -0.781466 |
| H | 5.732937  | -2.117327 | -0.990580 |
| H | 6.315706  | -1.023451 | 1.867267  |
| H | 5.966528  | 0.690829  | 1.585616  |
| H | 6.925337  | -0.227018 | 0.408560  |
| H | -4.892642 | 1.920030  | -1.950669 |
| H | -4.976888 | 2.533237  | -0.291474 |
| H | -3.474117 | 2.703431  | -1.213260 |
| H | -4.940032 | -0.764459 | 0.372194  |

**Conformer 40:**

|   |           |           |           |
|---|-----------|-----------|-----------|
| C | -1.702149 | -1.289326 | 0.362628  |
| C | -1.848213 | -0.559719 | -0.845609 |
| C | -0.641048 | -0.254036 | -1.568370 |
| C | 0.656080  | -0.634510 | -1.131012 |
| C | 0.741343  | -1.322112 | 0.073983  |
| C | -0.414441 | -1.665996 | 0.835105  |
| C | 1.835459  | -0.392470 | -2.056779 |
| C | 3.132165  | 0.226476  | -1.482956 |
| O | 1.923117  | -1.764477 | 0.586726  |
| C | 2.905631  | 1.613363  | -0.845845 |
| C | 2.474648  | 1.596393  | 0.604983  |
| C | 2.577099  | 0.480480  | 1.342805  |
| C | 3.048975  | -0.830666 | 0.789763  |
| C | 1.980783  | 2.927314  | 1.156441  |
| H | 3.791458  | 0.363965  | -2.352279 |
| C | -0.298256 | -2.373741 | 2.086241  |
| C | 0.523194  | 3.199544  | 0.719968  |
| C | 2.118327  | 3.077578  | 2.678559  |
| C | -3.137616 | -0.132723 | -1.414361 |
| O | -3.153372 | 0.478102  | -2.510377 |
| O | -2.769420 | -1.622767 | 1.087393  |
| O | -0.718206 | 0.403508  | -2.720967 |
| O | -1.278595 | -2.703703 | 2.786687  |
| C | -4.472625 | -0.367998 | -0.745220 |
| C | -4.798564 | 0.657021  | 0.378124  |
| C | -4.922055 | 2.088474  | -0.164518 |
| C | -6.083919 | 0.227582  | 1.100675  |
| C | 3.881866  | -0.692947 | -0.496762 |
| C | 4.253123  | -2.059773 | -1.079977 |
| O | 5.088035  | -0.036114 | -0.051683 |
| H | 2.088039  | -1.342250 | -2.545789 |
| H | 1.490644  | 0.263480  | -2.857323 |
| H | 3.839156  | 2.189803  | -0.894239 |
| H | 2.176419  | 2.172742  | -1.445348 |
| H | 2.298501  | 0.479402  | 2.392647  |
| H | 3.652561  | -1.363644 | 1.529359  |



|   |           |           |           |
|---|-----------|-----------|-----------|
| H | 2.607553  | 3.703533  | 0.691101  |
| H | 0.713115  | -2.629291 | 2.426260  |
| H | 0.214852  | 4.205076  | 1.026653  |
| H | 0.395264  | 3.128252  | -0.364424 |
| H | -0.156655 | 2.478586  | 1.187244  |
| H | 1.847401  | 4.094858  | 2.980458  |
| H | 3.143234  | 2.884789  | 3.011045  |
| H | 1.451551  | 2.392709  | 3.214610  |
| H | -2.427651 | -2.123226 | 1.898663  |
| H | -1.710840 | 0.573521  | -2.883487 |
| H | -5.223384 | -0.278005 | -1.537455 |
| H | -4.512628 | -1.374798 | -0.326573 |
| H | -3.980417 | 0.627882  | 1.107502  |
| H | -5.133929 | 2.788870  | 0.651179  |
| H | -4.007583 | 2.422480  | -0.664423 |
| H | -5.739571 | 2.163317  | -0.891893 |
| H | -6.329925 | 0.928508  | 1.906172  |
| H | -5.978482 | -0.769527 | 1.541174  |
| H | -6.934787 | 0.204682  | 0.408111  |
| H | 4.825792  | -1.933010 | -2.007692 |
| H | 4.874945  | -2.604914 | -0.362718 |
| H | 3.378642  | -2.672893 | -1.302130 |
| H | 5.755410  | -0.120554 | -0.745822 |

**Conformer 42:**

|   |           |           |           |
|---|-----------|-----------|-----------|
| C | 1.751633  | -1.268004 | -0.358021 |
| C | 1.893637  | -0.410567 | 0.767046  |
| C | 0.685124  | -0.066361 | 1.474068  |
| C | -0.599372 | -0.567777 | 1.129866  |
| C | -0.678322 | -1.393172 | 0.016065  |
| C | 0.472266  | -1.757422 | -0.743254 |
| C | -1.771480 | -0.281696 | 2.050987  |
| C | -3.092814 | 0.238898  | 1.436702  |
| O | -1.849587 | -1.949881 | -0.401715 |
| C | -2.887078 | 1.545656  | 0.635396  |
| C | -2.536565 | 1.353789  | -0.827368 |
| C | -2.636466 | 0.147196  | -1.415289 |
| C | -3.025552 | -1.106256 | -0.682019 |
| C | -2.100851 | 2.572595  | -1.629186 |
| H | -3.745922 | 0.469742  | 2.287117  |
| C | 0.355863  | -2.599058 | -1.908851 |
| C | -3.143777 | 3.707492  | -1.591417 |
| C | -0.715917 | 3.088367  | -1.185216 |
| C | 3.170245  | 0.120706  | 1.271007  |
| O | 3.162125  | 0.921983  | 2.237731  |
| O | 2.806370  | -1.612093 | -1.094491 |
| O | 0.748794  | 0.744232  | 2.524077  |
| O | 1.328617  | -2.945586 | -2.611542 |
| C | 4.541347  | -0.240238 | 0.735397  |
| C | 5.256200  | 0.969153  | 0.073064  |
| C | 6.715944  | 0.603898  | -0.231180 |
| C | 4.533684  | 1.453231  | -1.193478 |
| C | -3.844013 | -0.811276 | 0.589395  |
| C | -4.192381 | -2.085846 | 1.355910  |
| O | -5.120607 | -0.288165 | 0.171111  |
| H | -1.986925 | -1.190225 | 2.626804  |
| H | -1.439131 | 0.456992  | 2.781557  |
| H | -3.798925 | 2.155185  | 0.693989  |
| H | -2.111506 | 2.148908  | 1.122613  |
| H | -2.391441 | 0.039139  | -2.470473 |
| H | -3.620283 | -1.759417 | -1.326796 |
| H | -2.007470 | 2.245155  | -2.672812 |
| H | -0.649431 | -2.946732 | -2.177711 |
| H | -2.840777 | 4.518901  | -2.261618 |
| H | -4.130776 | 3.357874  | -1.913876 |
| H | -3.244088 | 4.132994  | -0.586942 |
| H | -0.394443 | 3.907803  | -1.837200 |
| H | 0.038522  | 2.297424  | -1.237623 |
| H | -0.733932 | 3.472515  | -0.159622 |
| H | 2.465077  | -2.211712 | -1.836550 |
| H | 1.732585  | 1.001408  | 2.623117  |

|   |           |           |           |
|---|-----------|-----------|-----------|
| H | 5.120270  | -0.531055 | 1.620567  |
| H | 4.509647  | -1.081484 | 0.047739  |
| H | 5.251177  | 1.785092  | 0.806929  |
| H | 7.248334  | 1.458410  | -0.663678 |
| H | 7.250827  | 0.299421  | 0.675452  |
| H | 6.773976  | -0.222854 | -0.950003 |
| H | 5.054933  | 2.314121  | -1.626738 |
| H | 3.504445  | 1.764310  | -0.982409 |
| H | 4.494490  | 0.663466  | -1.951922 |
| H | -4.752636 | -1.832725 | 2.261391  |
| H | -4.828256 | -2.718934 | 0.730081  |
| H | -3.305425 | -2.657064 | 1.632361  |
| H | -4.976763 | 0.419562  | -0.472856 |

**Conformer 43:**

|   |           |           |           |
|---|-----------|-----------|-----------|
| C | 1.641098  | -1.375268 | -0.420039 |
| C | 1.864324  | -0.348321 | 0.531413  |
| C | 0.721881  | 0.102920  | 1.280092  |
| C | -0.592027 | -0.404049 | 1.092281  |
| C | -0.758612 | -1.382370 | 0.118509  |
| C | 0.333799  | -1.889314 | -0.644328 |
| C | -1.686883 | 0.044779  | 2.045117  |
| C | -3.063153 | 0.470043  | 1.483101  |
| O | -1.963089 | -1.965798 | -0.138904 |
| C | -2.975408 | 1.658551  | 0.500531  |
| C | -2.670990 | 1.280039  | -0.932183 |
| C | -2.784194 | 0.008984  | -1.348767 |
| C | -3.143278 | -1.129669 | -0.443263 |
| C | -2.286140 | 2.385265  | -1.904523 |
| H | -3.643918 | 0.803474  | 2.352197  |
| C | 0.135021  | -2.905656 | -1.647822 |
| C | -3.356533 | 3.492609  | -1.979779 |
| C | -0.900457 | 2.983972  | -1.585854 |
| C | 3.178026  | 0.262898  | 0.804317  |
| O | 3.276049  | 1.127016  | 1.705169  |
| O | 2.655245  | -1.872192 | -1.127631 |
| O | 0.878338  | 1.035610  | 2.215689  |
| O | 1.059833  | -3.390184 | -2.333266 |
| C | 4.429313  | -0.123260 | 0.040228  |
| C | 5.674924  | 0.721823  | 0.358068  |
| C | 6.932472  | 0.007094  | -0.162243 |
| C | 5.570968  | 2.138249  | -0.230182 |
| C | -3.857359 | -0.686040 | 0.851149  |
| C | -4.102309 | -1.862370 | 1.800815  |
| O | -5.127309 | -0.113228 | 0.482484  |
| H | -1.843306 | -0.751056 | 2.784855  |
| H | -1.297221 | 0.892360  | 2.610374  |
| H | -3.934379 | 2.190530  | 0.507814  |
| H | -2.228530 | 2.373087  | 0.867467  |
| H | -2.582180 | -0.243973 | -2.388169 |
| H | -3.783606 | -1.847935 | -0.968351 |
| H | -2.220607 | 1.922025  | -2.897847 |
| H | -0.891062 | -3.261745 | -1.804439 |
| H | -3.099825 | 4.212356  | -2.764714 |
| H | -4.344035 | 3.078175  | -2.208223 |
| H | -3.430877 | 4.046960  | -1.037669 |
| H | -0.622531 | 3.717566  | -2.350707 |
| H | -0.128030 | 2.208874  | -1.562450 |
| H | -0.892306 | 3.499002  | -0.619036 |
| H | 2.265644  | -2.572579 | -1.744693 |
| H | 1.867540  | 1.268518  | 2.220754  |
| H | 4.616460  | -1.184417 | 0.253608  |
| H | 4.211665  | -0.104240 | -1.033846 |
| H | 5.755362  | 0.812851  | 1.447865  |
| H | 7.832921  | 0.588744  | 0.064063  |
| H | 7.050435  | -0.983248 | 0.292540  |
| H | 6.890539  | -0.128480 | -1.250511 |
| H | 6.461144  | 2.727415  | 0.017437  |
| H | 4.699262  | 2.671284  | 0.158887  |
| H | 5.493647  | 2.100136  | -1.324802 |
| H | -4.593573 | -1.506583 | 2.711848  |

|   |           |           |          |
|---|-----------|-----------|----------|
| H | -4.761526 | -2.598450 | 1.322556 |
| H | -3.182790 | -2.384127 | 2.069900 |
| H | -5.723752 | -0.821764 | 0.205132 |

**Conformer 45:**

|   |           |           |           |
|---|-----------|-----------|-----------|
| C | 1.681906  | 1.099110  | 0.626873  |
| C | 1.923997  | 0.098223  | -0.347796 |
| C | 0.817782  | -0.268795 | -1.190685 |
| C | -0.467847 | 0.329109  | -1.104443 |
| C | -0.653951 | 1.291137  | -0.118091 |
| C | 0.396801  | 1.695429  | 0.755992  |
| C | -1.504754 | -0.017317 | -2.158605 |
| C | -2.947665 | -0.361360 | -1.718111 |
| O | -1.835508 | 1.947971  | 0.053141  |
| C | -3.015997 | -1.574973 | -0.766797 |
| C | -2.805607 | -1.255599 | 0.699243  |
| C | -2.869724 | 0.009567  | 1.142408  |
| C | -3.088353 | 1.189948  | 0.244446  |
| C | -2.565715 | -2.450779 | 1.612747  |
| H | -3.469621 | -0.638110 | -2.645658 |
| C | 0.174161  | 2.683594  | 1.782709  |
| C | -2.105427 | -2.090726 | 3.032063  |
| C | -3.810601 | -3.365631 | 1.673795  |
| C | 3.222270  | -0.570302 | -0.550444 |
| O | 3.318881  | -1.470402 | -1.415621 |
| O | 2.652736  | 1.484229  | 1.454515  |
| O | 0.985902  | -1.201756 | -2.124532 |
| O | 1.061176  | 3.070909  | 2.572062  |
| C | 4.453613  | -0.219414 | 0.261632  |
| C | 5.749302  | -0.920638 | -0.181678 |
| C | 6.281282  | -0.354203 | -1.508038 |
| C | 6.808648  | -0.800105 | 0.925679  |
| C | -3.718515 | 0.829076  | -1.111567 |
| C | -3.811637 | 2.046799  | -2.035876 |
| O | -5.055062 | 0.408239  | -0.763876 |
| H | -1.548066 | 0.808852  | -2.880168 |
| H | -1.125378 | -0.873092 | -2.718710 |
| H | -3.999770 | -2.047588 | -0.871735 |
| H | -2.281906 | -2.327698 | -1.084051 |
| H | -2.726157 | 0.239288  | 2.193864  |
| H | -3.729104 | 1.930202  | 0.731351  |
| H | -1.759235 | -3.035923 | 1.143895  |
| H | -0.834585 | 3.108489  | 1.859900  |
| H | -1.863862 | -3.002976 | 3.587344  |
| H | -1.212537 | -1.457581 | 3.022152  |
| H | -2.889976 | -1.566871 | 3.590154  |
| H | -3.606712 | -4.240980 | 2.299851  |
| H | -4.107476 | -3.728319 | 0.685506  |
| H | -4.661579 | -2.827880 | 2.107042  |
| H | 2.255107  | 2.186796  | 2.064482  |
| H | 1.948062  | -1.517136 | -2.039190 |
| H | 4.582535  | 0.869015  | 0.260760  |
| H | 4.222470  | -0.457841 | 1.308698  |
| H | 5.526649  | -1.983721 | -0.332447 |
| H | 7.196192  | -0.874622 | -1.812963 |
| H | 5.550307  | -0.464706 | -2.313515 |
| H | 6.525404  | 0.711397  | -1.405842 |
| H | 7.737028  | -1.302934 | 0.633065  |
| H | 6.464660  | -1.251366 | 1.863565  |
| H | 7.051341  | 0.250420  | 1.130378  |
| H | -4.244395 | 1.756751  | -3.001947 |
| H | -4.460737 | 2.801245  | -1.580024 |
| H | -2.840438 | 2.506773  | -2.223431 |
| H | -5.587036 | 0.383701  | -1.570556 |

**Conformer 46:**

|   |           |           |           |
|---|-----------|-----------|-----------|
| C | 1.607541  | 1.401261  | 0.584403  |
| C | 1.908362  | 0.344831  | -0.312777 |
| C | 0.823668  | -0.149245 | -1.118736 |
| C | -0.500989 | 0.359527  | -1.052184 |
| C | -0.744817 | 1.373821  | -0.133302 |

|   |           |           |           |
|---|-----------|-----------|-----------|
| C | 0.284838  | 1.914611  | 0.690262  |
| C | -1.522122 | -0.132594 | -2.062866 |
| C | -2.930964 | -0.546700 | -1.574617 |
| O | -1.967560 | 1.958204  | 0.008487  |
| C | -2.898009 | -1.692364 | -0.539378 |
| C | -2.706527 | -1.249556 | 0.895037  |
| C | -2.861469 | 0.035950  | 1.248223  |
| C | -3.162983 | 1.132746  | 0.273241  |
| C | -2.388335 | -2.309551 | 1.939474  |
| H | -3.442255 | -0.926550 | -2.471049 |
| C | 0.005244  | 2.962598  | 1.640847  |
| C | -3.453458 | -3.423682 | 1.981921  |
| C | -0.978105 | -2.906437 | 1.752495  |
| C | 3.245734  | -0.259702 | -0.475222 |
| O | 3.399130  | -1.184046 | -1.305773 |
| O | 2.559254  | 1.924416  | 1.356934  |
| O | 1.048459  | -1.124463 | -1.995510 |
| O | 0.872627  | 3.474240  | 2.379684  |
| C | 4.439934  | 0.204127  | 0.334824  |
| C | 5.789991  | -0.504744 | 0.094238  |
| C | 5.777605  | -1.991529 | 0.488406  |
| C | 6.350063  | -0.288936 | -1.322050 |
| C | -3.779190 | 0.627359  | -1.043359 |
| C | -3.969930 | 1.763853  | -2.052375 |
| O | -5.078069 | 0.138671  | -0.645218 |
| H | -1.633848 | 0.635624  | -2.838963 |
| H | -1.088494 | -0.996205 | -2.568910 |
| H | -3.844643 | -2.244126 | -0.591280 |
| H | -2.115501 | -2.407901 | -0.819925 |
| H | -2.743410 | 0.333188  | 2.288640  |
| H | -3.849004 | 1.861902  | 0.712748  |
| H | -2.401870 | -1.804174 | 2.914028  |
| H | -1.030692 | 3.318588  | 1.704666  |
| H | -3.252364 | -4.106100 | 2.814938  |
| H | -4.458194 | -3.009635 | 2.116651  |
| H | -3.451437 | -4.019599 | 1.062369  |
| H | -0.753401 | -3.604083 | 2.566877  |
| H | -0.212088 | -2.124629 | 1.754297  |
| H | -0.892342 | -3.461733 | 0.812024  |
| H | 2.118830  | 2.642953  | 1.917384  |
| H | 2.033757  | -1.358891 | -1.909870 |
| H | 4.550273  | 1.282584  | 0.166806  |
| H | 4.165479  | 0.133392  | 1.394468  |
| H | 6.478785  | 0.000579  | 0.787189  |
| H | 6.792764  | -2.403005 | 0.451725  |
| H | 5.403478  | -2.127348 | 1.510485  |
| H | 5.149139  | -2.578136 | -0.186365 |
| H | 7.375141  | -0.671229 | -1.387699 |
| H | 6.378604  | 0.777088  | -1.578482 |
| H | 5.746479  | -0.804770 | -2.072950 |
| H | -4.388862 | 1.373201  | -2.988633 |
| H | -4.668504 | 2.500554  | -1.643007 |
| H | -3.036866 | 2.278129  | -2.286592 |
| H | -5.616174 | 0.020289  | -1.439439 |

**Conformer 47:**

|   |           |           |           |
|---|-----------|-----------|-----------|
| C | -1.571734 | -1.216847 | 0.449041  |
| C | -1.843530 | -0.096259 | -0.376068 |
| C | -0.745601 | 0.425934  | -1.144536 |
| C | 0.559717  | -0.133875 | -1.130475 |
| C | 0.773949  | -1.220356 | -0.289805 |
| C | -0.266913 | -1.780389 | 0.506747  |
| C | 1.591065  | 0.396446  | -2.110800 |
| C | 3.015628  | 0.723989  | -1.603211 |
| O | 1.975747  | -1.856481 | -0.203645 |
| C | 3.024356  | 1.781789  | -0.479965 |
| C | 2.834462  | 1.240021  | 0.920523  |
| C | 2.952143  | -0.071941 | 1.175662  |
| C | 3.203001  | -1.097309 | 0.111000  |
| C | 2.559418  | 2.284867  | 1.993833  |
| H | 3.535631  | 1.155764  | -2.470683 |

|   |           |           |           |
|---|-----------|-----------|-----------|
| C | -0.015062 | -2.895586 | 1.386055  |
| C | 1.079539  | 2.730313  | 1.963959  |
| C | 2.960385  | 1.860944  | 3.414359  |
| C | -3.163907 | 0.548346  | -0.497225 |
| O | -3.286872 | 1.559776  | -1.225261 |
| O | -2.533429 | -1.749327 | 1.202462  |
| O | -0.940478 | 1.478023  | -1.935753 |
| O | -0.892396 | -3.421678 | 2.102476  |
| C | -4.387655 | 0.040748  | 0.239812  |
| C | -5.704957 | 0.751650  | -0.115174 |
| C | -6.204974 | 0.363648  | -1.516119 |
| C | -6.767842 | 0.435024  | 0.949245  |
| C | 3.826293  | -0.515088 | -1.169817 |
| C | 3.969930  | -1.577985 | -2.263301 |
| O | 5.144111  | -0.102119 | -0.749044 |
| H | 1.671074  | -0.315183 | -2.942710 |
| H | 1.185113  | 1.309986  | -2.547452 |
| H | 3.986932  | 2.310458  | -0.489224 |
| H | 2.262456  | 2.542385  | -0.692355 |
| H | 2.848607  | -0.453840 | 2.187214  |
| H | 3.864979  | -1.883521 | 0.483879  |
| H | 3.166760  | 3.163986  | 1.728989  |
| H | 1.008069  | -3.291183 | 1.414072  |
| H | 0.917136  | 3.560766  | 2.659819  |
| H | 0.767141  | 3.062988  | 0.969424  |
| H | 0.425505  | 1.903834  | 2.263136  |
| H | 2.834535  | 2.701124  | 4.105504  |
| H | 4.005104  | 1.537145  | 3.457843  |
| H | 2.333835  | 1.041379  | 3.784090  |
| H | -2.114724 | -2.517025 | 1.711252  |
| H | -1.914312 | 1.743799  | -1.817447 |
| H | -4.475685 | -1.040252 | 0.081012  |
| H | -4.173784 | 0.133794  | 1.313170  |
| H | -5.520991 | 1.832674  | -0.108669 |
| H | -7.136080 | 0.889724  | -1.755171 |
| H | -5.472183 | 0.614969  | -2.287616 |
| H | -6.410191 | -0.713566 | -1.571353 |
| H | -7.712050 | 0.940998  | 0.719458  |
| H | -6.448478 | 0.758747  | 1.946639  |
| H | -6.972585 | -0.642075 | 0.997825  |
| H | 4.394349  | -1.131967 | -3.171947 |
| H | 4.646221  | -2.366492 | -1.918022 |
| H | 3.017918  | -2.041546 | -2.525606 |
| H | 5.679991  | 0.058061  | -1.537405 |

**Conformer 50:**

|   |           |           |           |
|---|-----------|-----------|-----------|
| C | -1.748129 | -0.780462 | 0.575942  |
| C | -1.883240 | 0.331787  | -0.294822 |
| C | -0.746022 | 0.653572  | -1.117148 |
| C | 0.470362  | -0.080107 | -1.099321 |
| C | 0.557328  | -1.140156 | -0.204616 |
| C | -0.530570 | -1.513400 | 0.638063  |
| C | 1.537186  | 0.252277  | -2.127647 |
| C | 3.006086  | 0.408495  | -1.667077 |
| O | 1.663725  | -1.928516 | -0.105049 |
| C | 3.188259  | 1.513311  | -0.605673 |
| C | 2.961975  | 1.078182  | 0.826212  |
| C | 2.907384  | -0.222118 | 1.152590  |
| C | 2.990123  | -1.327486 | 0.143101  |
| C | 2.858539  | 2.206380  | 1.843993  |
| H | 3.556314  | 0.718237  | -2.567418 |
| C | -0.412284 | -2.613185 | 1.563306  |
| C | 1.453353  | 2.849703  | 1.814268  |
| C | 3.232083  | 1.806995  | 3.279031  |
| C | -3.088735 | 1.170989  | -0.399481 |
| O | -3.090897 | 2.146995  | -1.188169 |
| O | -2.756843 | -1.152776 | 1.362913  |
| O | -0.817420 | 1.679797  | -1.958978 |
| O | -1.336436 | -2.983053 | 2.318109  |
| C | -4.358408 | 0.923083  | 0.382559  |
| C | -5.267553 | -0.177960 | -0.234474 |

|   |           |           |           |
|---|-----------|-----------|-----------|
| C | -6.436585 | -0.464153 | 0.719542  |
| C | -5.776176 | 0.208163  | -1.631194 |
| C | 3.652461  | -0.904996 | -1.180119 |
| C | 3.621995  | -2.034368 | -2.214445 |
| O | 5.024772  | -0.654577 | -0.808180 |
| H | 1.497988  | -0.506515 | -2.919861 |
| H | 1.246623  | 1.188457  | -2.606370 |
| H | 4.213577  | 1.902719  | -0.662131 |
| H | 2.532429  | 2.359252  | -0.846961 |
| H | 2.778309  | -0.531996 | 2.185607  |
| H | 3.549442  | -2.175459 | 0.547399  |
| H | 3.573946  | 2.977957  | 1.520354  |
| H | 0.547762  | -3.143558 | 1.592370  |
| H | 1.422656  | 3.728840  | 2.467251  |
| H | 1.166152  | 3.171681  | 0.808697  |
| H | 0.699393  | 2.137778  | 2.167880  |
| H | 3.239943  | 2.692030  | 3.924044  |
| H | 4.223069  | 1.344182  | 3.322967  |
| H | 2.507932  | 1.103121  | 3.704652  |
| H | -2.429782 | -1.944456 | 1.903039  |
| H | -1.743539 | 2.087263  | -1.829443 |
| H | -4.121189 | 0.648551  | 1.411530  |
| H | -4.901015 | 1.874416  | 0.379835  |
| H | -4.673702 | -1.095738 | -0.319086 |
| H | -7.086922 | -1.246961 | 0.313511  |
| H | -6.078282 | -0.797478 | 1.699317  |
| H | -7.049875 | 0.433394  | 0.869448  |
| H | -6.398938 | -0.592859 | -2.045040 |
| H | -4.957746 | 0.393358  | -2.333744 |
| H | -6.385275 | 1.119358  | -1.589336 |
| H | 4.078424  | -1.699465 | -3.154766 |
| H | 4.194601  | -2.888101 | -1.838168 |
| H | 2.609527  | -2.377297 | -2.431967 |
| H | 5.556373  | -0.610928 | -1.614306 |

**Conformer 51:**

|   |           |           |           |
|---|-----------|-----------|-----------|
| C | 1.673103  | -1.132315 | -0.656240 |
| C | 1.855926  | -0.631146 | 0.661425  |
| C | 0.667319  | -0.464469 | 1.460111  |
| C | -0.636858 | -0.812163 | 1.015081  |
| C | -0.755657 | -1.287230 | -0.284302 |
| C | 0.373939  | -1.455577 | -1.138167 |
| C | -1.788113 | -0.763381 | 2.003261  |
| C | -3.098817 | -0.055601 | 1.585072  |
| O | -1.948556 | -1.671083 | -0.818652 |
| C | -2.858806 | 1.413492  | 1.171099  |
| C | -2.538636 | 1.633663  | -0.295028 |
| C | -2.687374 | 0.645455  | -1.195841 |
| C | -3.101949 | -0.753081 | -0.826879 |
| C | -2.081717 | 3.040582  | -0.660706 |
| H | -3.734521 | -0.051767 | 2.478924  |
| C | 0.216755  | -1.930526 | -2.490964 |
| C | -0.592115 | 3.243207  | -0.299722 |
| C | -2.333241 | 3.435749  | -2.123432 |
| C | 3.154848  | -0.299650 | 1.268483  |
| O | 3.184086  | 0.197571  | 2.421183  |
| O | 2.707739  | -1.285405 | -1.480472 |
| O | 0.769374  | 0.017644  | 2.693484  |
| O | 1.169629  | -2.092891 | -3.282097 |
| C | 4.507127  | -0.533765 | 0.625412  |
| C | 5.250211  | 0.792947  | 0.308545  |
| C | 6.693884  | 0.488547  | -0.115679 |
| C | 4.526485  | 1.628071  | -0.758776 |
| C | -3.893429 | -0.805433 | 0.493580  |
| C | -4.271369 | -2.234340 | 0.879293  |
| O | -5.158520 | -0.152469 | 0.266408  |
| H | -2.025326 | -1.790400 | 2.307235  |
| H | -1.423747 | -0.267523 | 2.903949  |
| H | -3.746991 | 2.015991  | 1.411651  |
| H | -2.056625 | 1.838269  | 1.787316  |
| H | -2.477231 | 0.821414  | -2.247071 |

|   |           |           |           |
|---|-----------|-----------|-----------|
| H | -3.725120 | -1.186488 | -1.614174 |
| H | -2.662994 | 3.728235  | -0.027682 |
| H | -0.802531 | -2.158683 | -2.826782 |
| H | -0.301268 | 4.286689  | -0.461680 |
| H | -0.381765 | 2.997212  | 0.745306  |
| H | 0.043538  | 2.611865  | -0.929981 |
| H | -2.079086 | 4.490035  | -2.274210 |
| H | -3.381557 | 3.296255  | -2.406964 |
| H | -1.713656 | 2.852082  | -2.813299 |
| H | 2.338543  | -1.641284 | -2.354354 |
| H | 1.762489  | 0.207150  | 2.841347  |
| H | 5.088248  | -1.073280 | 1.383291  |
| H | 4.440572  | -1.150302 | -0.267410 |
| H | 5.280118  | 1.373166  | 1.239585  |
| H | 7.246681  | 1.415365  | -0.305715 |
| H | 7.230912  | -0.069316 | 0.659676  |
| H | 6.717016  | -0.107494 | -1.036433 |
| H | 5.068431  | 2.561468  | -0.947518 |
| H | 3.510195  | 1.895009  | -0.448139 |
| H | 4.453016  | 1.080997  | -1.705225 |
| H | -4.810632 | -2.231034 | 1.831686  |
| H | -4.935637 | -2.649026 | 0.115377  |
| H | -3.399156 | -2.883475 | 0.964720  |
| H | -5.001025 | 0.703715  | -0.156001 |

**Conformer 52:**

|   |           |           |           |
|---|-----------|-----------|-----------|
| C | 1.651148  | -1.201150 | -0.552340 |
| C | 1.876957  | -0.118211 | 0.334668  |
| C | 0.754921  | 0.324497  | 1.118304  |
| C | -0.531120 | -0.275479 | 1.057584  |
| C | -0.700203 | -1.321697 | 0.157602  |
| C | 0.366752  | -1.803761 | -0.655132 |
| C | -1.589234 | 0.166793  | 2.053144  |
| C | -3.020227 | 0.473689  | 1.550419  |
| O | -1.879587 | -1.990536 | 0.022594  |
| C | -3.059195 | 1.598324  | 0.492608  |
| C | -2.828517 | 1.141356  | -0.931527 |
| C | -2.894615 | -0.158355 | -1.259786 |
| C | -3.127074 | -1.253713 | -0.264585 |
| C | -2.573947 | 2.199595  | -1.994993 |
| H | -3.561588 | 0.835283  | 2.436662  |
| C | 0.161302  | -2.878136 | -1.595318 |
| C | -3.708597 | 3.241410  | -2.063983 |
| C | -1.206336 | 2.889979  | -1.813152 |
| C | 3.173727  | 0.562279  | 0.505117  |
| O | 3.256131  | 1.535276  | 1.289092  |
| O | 2.637619  | -1.660499 | -1.321671 |
| O | 0.907393  | 1.336037  | 1.969218  |
| O | 1.062969  | -3.336183 | -2.327994 |
| C | 4.420167  | 0.137344  | -0.246038 |
| C | 5.709065  | 0.873660  | 0.158176  |
| C | 6.211862  | 0.430035  | 1.541472  |
| C | 6.790399  | 0.650209  | -0.911345 |
| C | -3.783599 | -0.765737 | 1.038960  |
| C | -3.902245 | -1.892335 | 2.069800  |
| O | -5.110420 | -0.374194 | 0.625714  |
| H | -1.652415 | -0.590881 | 2.844923  |
| H | -1.218260 | 1.068409  | 2.542524  |
| H | -4.041852 | 2.084495  | 0.528404  |
| H | -2.329445 | 2.371266  | 0.762809  |
| H | -2.750054 | -0.467228 | -2.293433 |
| H | -3.759105 | -2.036548 | -0.692487 |
| H | -2.549120 | 1.675925  | -2.959618 |
| H | -0.847722 | -3.305002 | -1.656558 |
| H | -3.547063 | 3.919372  | -2.909147 |
| H | -4.683654 | 2.760708  | -2.195394 |
| H | -3.750588 | 3.853653  | -1.156189 |
| H | -1.023201 | 3.586241  | -2.639050 |
| H | -0.391189 | 2.159706  | -1.797906 |
| H | -1.161527 | 3.466157  | -0.882467 |
| H | 2.249915  | -2.413343 | -1.875346 |

|   |           |           |           |
|---|-----------|-----------|-----------|
| H | 1.872720  | 1.640402  | 1.876308  |
| H | 4.544954  | -0.946813 | -0.143211 |
| H | 4.211434  | 0.279342  | -1.315002 |
| H | 5.487436  | 1.946539  | 0.206433  |
| H | 7.122319  | 0.974514  | 1.816188  |
| H | 5.465089  | 0.615128  | 2.318244  |
| H | 6.454071  | -0.640891 | 1.542176  |
| H | 7.714538  | 1.175832  | -0.646736 |
| H | 6.467431  | 1.014384  | -1.893507 |
| H | 7.033125  | -0.415146 | -1.013940 |
| H | -4.352966 | -1.512746 | 2.995791  |
| H | -4.545857 | -2.683508 | 1.672120  |
| H | -2.937535 | -2.336329 | 2.319120  |
| H | -5.661070 | -0.281711 | 1.414730  |

**Conformer 53:**

|   |           |           |           |
|---|-----------|-----------|-----------|
| C | 1.655260  | 1.201781  | 0.553174  |
| C | 1.878332  | 0.114743  | -0.329207 |
| C | 0.754400  | -0.330537 | -1.108787 |
| C | -0.531433 | 0.271216  | -1.049914 |
| C | -0.696806 | 1.322250  | -0.155157 |
| C | 0.371723  | 1.806398  | 0.654846  |
| C | -1.589438 | -0.175314 | -2.044454 |
| C | -3.023738 | -0.476806 | -1.551874 |
| O | -1.874880 | 1.994283  | -0.020501 |
| C | -3.075724 | -1.597636 | -0.490490 |
| C | -2.838823 | -1.139800 | 0.931825  |
| C | -2.898389 | 0.161381  | 1.256568  |
| C | -3.124358 | 1.254175  | 0.256573  |
| C | -2.584668 | -2.195924 | 1.997174  |
| H | -3.567821 | -0.833963 | -2.435161 |
| C | 0.168850  | 2.884710  | 1.590549  |
| C | -3.718644 | -3.238397 | 2.066368  |
| C | -1.216732 | -2.885944 | 1.815691  |
| C | 3.174445  | -0.567408 | -0.499267 |
| O | 3.254329  | -1.544663 | -1.277990 |
| O | 2.643298  | 1.663173  | 1.319369  |
| O | 0.904586  | -1.346403 | -1.954506 |
| O | 1.071469  | 3.345111  | 2.320749  |
| C | 4.423113  | -0.138847 | 0.246179  |
| C | 5.710977  | -0.876124 | -0.159489 |
| C | 6.208671  | -0.437837 | -1.546341 |
| C | 6.795903  | -0.647784 | 0.905345  |
| C | -3.780738 | 0.765786  | -1.052061 |
| C | -3.887938 | 1.886181  | -2.090665 |
| O | -5.106048 | 0.296954  | -0.734715 |
| H | -1.645547 | 0.575840  | -2.842989 |
| H | -1.220044 | -1.081940 | -2.525420 |
| H | -4.064943 | -2.069638 | -0.527677 |
| H | -2.355232 | -2.379761 | -0.759174 |
| H | -2.747939 | 0.472907  | 2.288783  |
| H | -3.748931 | 2.044676  | 0.688557  |
| H | -2.559773 | -1.671207 | 2.961352  |
| H | -0.839627 | 3.313084  | 1.650945  |
| H | -3.556367 | -3.916291 | 2.911443  |
| H | -4.694273 | -2.758803 | 2.197786  |
| H | -3.760771 | -3.850002 | 1.158312  |
| H | -1.034020 | -3.582502 | 2.641432  |
| H | -0.401714 | -2.155531 | 1.801121  |
| H | -1.171674 | -3.461495 | 0.884710  |
| H | 2.257600  | 2.418783  | 1.870269  |
| H | 1.869471  | -1.651587 | -1.861864 |
| H | 4.547100  | 0.944957  | 0.138782  |
| H | 4.217942  | -0.276868 | 1.316377  |
| H | 5.489790  | -1.949307 | -0.202650 |
| H | 7.118470  | -0.982913 | -1.822038 |
| H | 5.459291  | -0.626542 | -2.319727 |
| H | 6.450255  | 0.633221  | -1.552281 |
| H | 7.719386  | -1.174008 | 0.639645  |
| H | 6.476539  | -1.008152 | 1.890093  |
| H | 7.038435  | 0.418111  | 1.002774  |



|   |           |          |           |
|---|-----------|----------|-----------|
| H | -4.341159 | 1.498326 | -3.008317 |
| H | -4.527982 | 2.691606 | -1.707600 |
| H | -2.921335 | 2.332231 | -2.329079 |
| H | -5.672610 | 1.057559 | -0.547165 |

**Conformer 56:**

|   |           |           |           |
|---|-----------|-----------|-----------|
| C | 1.827282  | -0.758858 | -0.626261 |
| C | 1.911158  | 0.343568  | 0.263336  |
| C | 0.753757  | 0.609765  | 1.077466  |
| C | -0.434879 | -0.167216 | 1.032598  |
| C | -0.471614 | -1.216358 | 0.121692  |
| C | 0.638831  | -1.535725 | -0.713647 |
| C | -1.524745 | 0.110088  | 2.053013  |
| C | -2.994312 | 0.216273  | 1.580301  |
| O | -1.546409 | -2.044341 | -0.002467 |
| C | -3.213445 | 1.335214  | 0.538510  |
| C | -2.951747 | 0.930530  | -0.896013 |
| C | -2.838038 | -0.361781 | -1.240118 |
| C | -2.891520 | -1.489481 | -0.255206 |
| C | -2.877201 | 2.025095  | -1.950578 |
| H | -3.563619 | 0.488097  | 2.481010  |
| C | 0.572123  | -2.624276 | -1.657172 |
| C | -4.154933 | 2.887560  | -1.985350 |
| C | -1.623668 | 2.909065  | -1.785650 |
| C | 3.083799  | 1.224373  | 0.396079  |
| O | 3.040876  | 2.186783  | 1.200108  |
| O | 2.857685  | -1.080958 | -1.407133 |
| O | 0.778465  | 1.622383  | 1.937984  |
| O | 1.517876  | -2.947389 | -2.406720 |
| C | 4.370908  | 1.035362  | -0.373818 |
| C | 5.311722  | -0.042142 | 0.237260  |
| C | 6.500840  | -0.272116 | -0.707095 |
| C | 5.790571  | 0.340167  | 1.645518  |
| C | -3.584081 | -1.113486 | 1.066822  |
| C | -3.520835 | -2.256614 | 2.084362  |
| O | -4.961052 | -0.910488 | 0.683252  |
| H | -1.464428 | -0.657168 | 2.835725  |
| H | -1.275225 | 1.050029  | 2.547264  |
| H | -4.253410 | 1.678454  | 0.600623  |
| H | -2.593426 | 2.200059  | 0.804305  |
| H | -2.673059 | -0.636160 | -2.280417 |
| H | -3.414742 | -2.349686 | -0.681463 |
| H | -2.794628 | 1.520138  | -2.921930 |
| H | -0.366935 | -3.189574 | -1.705861 |
| H | -4.112938 | 3.590161  | -2.824762 |
| H | -5.050439 | 2.268715  | -2.104438 |
| H | -4.268550 | 3.477927  | -1.069264 |
| H | -1.561273 | 3.631021  | -2.607394 |
| H | -0.709174 | 2.307705  | -1.792371 |
| H | -1.646963 | 3.478578  | -0.850086 |
| H | 2.566079  | -1.875841 | -1.962959 |
| H | 1.689751  | 2.066807  | 1.825847  |
| H | 4.156206  | 0.769269  | -1.409927 |
| H | 4.878650  | 2.005425  | -0.349184 |
| H | 4.750019  | -0.981578 | 0.301134  |
| H | 7.174180  | -1.037286 | -0.304960 |
| H | 6.165650  | -0.603232 | -1.695746 |
| H | 7.083300  | 0.648823  | -0.836692 |
| H | 6.436525  | -0.444710 | 2.054703  |
| H | 4.958231  | 0.485684  | 2.341030  |
| H | 6.367541  | 1.272742  | 1.624484  |
| H | -3.999843 | -1.954404 | 3.024504  |
| H | -4.055778 | -3.125918 | 1.688783  |
| H | -2.498189 | -2.563530 | 2.307871  |
| H | -5.502889 | -0.902506 | 1.483678  |

**Conformer 57:**

|   |           |           |           |
|---|-----------|-----------|-----------|
| C | -1.795887 | -1.311289 | 0.222855  |
| C | -1.900170 | -0.409235 | -0.867578 |
| C | -0.673790 | -0.048559 | -1.530336 |
| C | 0.603015  | -0.537884 | -1.144098 |

|   |           |           |           |
|---|-----------|-----------|-----------|
| C | 0.647874  | -1.396955 | -0.052231 |
| C | -0.528958 | -1.802461 | 0.643456  |
| C | 1.801208  | -0.209373 | -2.017615 |
| C | 3.115226  | 0.266721  | -1.353755 |
| O | 1.805975  | -1.955280 | 0.397840  |
| C | 2.940134  | 1.559944  | -0.527697 |
| C | 2.486159  | 1.347663  | 0.900116  |
| C | 2.533007  | 0.132038  | 1.466909  |
| C | 2.963540  | -1.105274 | 0.740159  |
| C | 2.026736  | 2.559725  | 1.697309  |
| H | 3.788538  | 0.499312  | -2.191502 |
| C | -0.454250 | -2.688076 | 1.779192  |
| C | 3.104731  | 3.660579  | 1.756962  |
| C | 0.691299  | 3.128164  | 1.174403  |
| C | -3.166193 | 0.142691  | -1.378605 |
| O | -3.145870 | 0.906366  | -2.374118 |
| O | -2.883399 | -1.704290 | 0.884894  |
| O | -0.712760 | 0.770518  | -2.576184 |
| O | -1.454532 | -3.077811 | 2.417987  |
| C | -4.517585 | -0.139252 | -0.762617 |
| C | -4.825372 | 0.724812  | 0.493412  |
| C | -4.893384 | 2.222711  | 0.161085  |
| C | -6.134595 | 0.241405  | 1.134427  |
| C | 3.816763  | -0.815711 | -0.507475 |
| C | 4.141571  | -2.097011 | -1.281431 |
| O | 5.042140  | -0.279726 | 0.036204  |
| H | 2.022479  | -1.086509 | -2.639487 |
| H | 1.490500  | 0.569750  | -2.715066 |
| H | 3.899262  | 2.091142  | -0.493878 |
| H | 2.243138  | 2.227646  | -1.048661 |
| H | 2.225122  | 0.001469  | 2.502734  |
| H | 3.537763  | -1.760489 | 1.400760  |
| H | 1.853507  | 2.212873  | 2.724458  |
| H | 0.542713  | -3.029253 | 2.084830  |
| H | 2.784647  | 4.465927  | 2.427035  |
| H | 4.056358  | 3.266855  | 2.129074  |
| H | 3.282524  | 4.105477  | 0.771499  |
| H | 0.351747  | 3.946196  | 1.819344  |
| H | -0.088897 | 2.360651  | 1.160507  |
| H | 0.788970  | 3.529574  | 0.159738  |
| H | -2.570243 | -2.330038 | 1.616966  |
| H | -1.696469 | 1.000379  | -2.718485 |
| H | -5.253627 | 0.089703  | -1.540552 |
| H | -4.596950 | -1.193693 | -0.493563 |
| H | -4.019290 | 0.562762  | 1.218804  |
| H | -5.092988 | 2.805978  | 1.067049  |
| H | -3.961476 | 2.592665  | -0.277577 |
| H | -5.697796 | 2.429651  | -0.555231 |
| H | -6.368510 | 0.827553  | 2.030164  |
| H | -6.068832 | -0.811730 | 1.427614  |
| H | -6.975759 | 0.348169  | 0.437868  |
| H | 4.731599  | -1.860041 | -2.176070 |
| H | 4.731363  | -2.766057 | -0.646729 |
| H | 3.246811  | -2.634830 | -1.597934 |
| H | 5.714885  | -0.291535 | -0.657784 |

**Conformer 58:**

|   |           |           |           |
|---|-----------|-----------|-----------|
| C | -1.553001 | -1.353228 | 0.418794  |
| C | -1.821626 | -0.366901 | -0.563577 |
| C | -0.703453 | 0.097520  | -1.340034 |
| C | 0.627813  | -0.360476 | -1.152556 |
| C | 0.839584  | -1.298029 | -0.147724 |
| C | -0.226540 | -1.814876 | 0.644656  |
| C | 1.697698  | 0.090400  | -2.131547 |
| C | 3.059999  | 0.582117  | -1.586874 |
| O | 2.065703  | -1.831685 | 0.112624  |
| C | 2.926592  | 1.790342  | -0.636568 |
| C | 2.662351  | 1.446632  | 0.813613  |
| C | 2.833214  | 0.196340  | 1.269335  |
| C | 3.220625  | -0.953935 | 0.389301  |
| C | 2.250373  | 2.615744  | 1.698376  |

|   |           |           |           |
|---|-----------|-----------|-----------|
| H | 3.618033  | 0.916535  | -2.473480 |
| C | 0.017781  | -2.789592 | 1.679307  |
| C | 0.754242  | 2.953140  | 1.505897  |
| C | 2.567913  | 2.430010  | 3.189392  |
| C | -3.157924 | 0.190588  | -0.840522 |
| O | -3.294411 | 1.022591  | -1.766505 |
| O | -2.541804 | -1.859656 | 1.154872  |
| O | -0.901033 | 0.995270  | -2.302225 |
| O | -0.882934 | -3.280948 | 2.391366  |
| C | -4.387694 | -0.214130 | -0.051652 |
| C | -5.665609 | 0.575061  | -0.384600 |
| C | -6.892272 | -0.167113 | 0.169917  |
| C | -5.608141 | 2.012528  | 0.157134  |
| C | 3.904202  | -0.524131 | -0.920709 |
| C | 4.188571  | -1.722842 | -1.830878 |
| O | 5.161772  | 0.032255  | -0.481136 |
| H | 1.879180  | -0.726584 | -2.841867 |
| H | 1.274385  | 0.902239  | -2.724626 |
| H | 3.856888  | 2.373500  | -0.661429 |
| H | 2.142381  | 2.460794  | -1.010239 |
| H | 2.675193  | -0.040691 | 2.317495  |
| H | 3.896500  | -1.631034 | 0.918566  |
| H | 2.825654  | 3.485362  | 1.345306  |
| H | 1.056894  | -3.105796 | 1.835293  |
| H | 0.494121  | 3.862467  | 2.058799  |
| H | 0.498787  | 3.117824  | 0.454693  |
| H | 0.127062  | 2.136752  | 1.880696  |
| H | 2.344440  | 3.351414  | 3.737560  |
| H | 3.622990  | 2.185804  | 3.348601  |
| H | 1.962507  | 1.633110  | 3.635933  |
| H | -2.121566 | -2.525319 | 1.790348  |
| H | -1.897906 | 1.194531  | -2.302363 |
| H | -4.538507 | -1.287809 | -0.227656 |
| H | -4.161069 | -0.151410 | 1.018941  |
| H | -5.758192 | 0.627993  | -1.475963 |
| H | -7.814926 | 0.374361  | -0.066426 |
| H | -6.978120 | -1.175168 | -0.251951 |
| H | -6.836603 | -0.265992 | 1.261510  |
| H | -6.520881 | 2.561186  | -0.101198 |
| H | -4.759208 | 2.563486  | -0.256554 |
| H | -5.520915 | 2.012539  | 1.251665  |
| H | 4.654778  | -1.386411 | -2.765854 |
| H | 4.879766  | -2.406349 | -1.327492 |
| H | 3.286370  | -2.281578 | -2.083523 |
| H | 5.745427  | 0.110627  | -1.247645 |

**Conformer 59:**

|   |           |           |           |
|---|-----------|-----------|-----------|
| C | -1.842554 | -0.660743 | 0.664266  |
| C | -1.948854 | 0.362381  | -0.313174 |
| C | -0.810008 | 0.559995  | -1.171904 |
| C | 0.381122  | -0.209856 | -1.088219 |
| C | 0.441156  | -1.176834 | -0.091624 |
| C | -0.650015 | -1.425704 | 0.791651  |
| C | 1.446325  | -0.022627 | -2.154164 |
| C | 2.926543  | 0.125847  | -1.728365 |
| O | 1.522592  | -1.987218 | 0.081103  |
| C | 3.168490  | 1.330417  | -0.794081 |
| C | 2.925456  | 1.061635  | 0.677072  |
| C | 2.820544  | -0.194771 | 1.137145  |
| C | 2.869348  | -1.405178 | 0.254236  |
| C | 2.854875  | 2.290014  | 1.574984  |
| H | 3.473547  | 0.316649  | -2.663109 |
| C | -0.559172 | -2.429914 | 1.822624  |
| C | 2.360381  | 2.014139  | 3.001637  |
| C | 4.211625  | 3.030253  | 1.616705  |
| C | -3.126445 | 1.227828  | -0.493962 |
| O | -3.103575 | 2.119205  | -1.376835 |
| O | -2.855012 | -0.916771 | 1.491822  |
| O | -0.856094 | 1.496663  | -2.113836 |
| O | -1.487422 | -2.689930 | 2.617158  |
| C | -4.395903 | 1.103497  | 0.317286  |

|   |           |           |           |
|---|-----------|-----------|-----------|
| C | -5.346887 | -0.022915 | -0.179102 |
| C | -6.514148 | -0.173414 | 0.807564  |
| C | -5.857678 | 0.238256  | -1.603718 |
| C | 3.531857  | -1.151456 | -1.110598 |
| C | 3.449568  | -2.381785 | -2.019124 |
| O | 4.916180  | -0.913950 | -0.776763 |
| H | 1.369800  | -0.856296 | -2.864219 |
| H | 1.182723  | 0.869835  | -2.723404 |
| H | 4.207626  | 1.660699  | -0.909786 |
| H | 2.543810  | 2.173550  | -1.118074 |
| H | 2.654094  | -0.389417 | 2.192299  |
| H | 3.406331  | -2.220124 | 0.747275  |
| H | 2.130888  | 2.971779  | 1.102055  |
| H | 0.383020  | -2.986979 | 1.898900  |
| H | 2.247904  | 2.957975  | 3.545123  |
| H | 1.390172  | 1.507276  | 3.005351  |
| H | 3.071124  | 1.396774  | 3.563006  |
| H | 4.131322  | 3.933018  | 2.231760  |
| H | 4.547430  | 3.337079  | 0.621964  |
| H | 4.985829  | 2.388808  | 2.052842  |
| H | -2.549240 | -1.660885 | 2.106753  |
| H | -1.766007 | 1.947569  | -2.019623 |
| H | -4.157721 | 0.926790  | 1.367294  |
| H | -4.906877 | 2.067446  | 0.221572  |
| H | -4.784128 | -0.963875 | -0.175675 |
| H | -7.193690 | -0.970897 | 0.486888  |
| H | -6.156078 | -0.418965 | 1.813012  |
| H | -7.096656 | 0.754377  | 0.871597  |
| H | -6.510061 | -0.579185 | -1.930710 |
| H | -5.041158 | 0.325364  | -2.327196 |
| H | -6.436868 | 1.168599  | -1.648936 |
| H | 3.912100  | -2.166208 | -2.990874 |
| H | 3.990928  | -3.213217 | -1.556582 |
| H | 2.422825  | -2.704914 | -2.196318 |
| H | 5.439918  | -0.971013 | -1.587191 |

**Conformer 60:**

|   |           |           |           |
|---|-----------|-----------|-----------|
| C | 1.610858  | -1.403695 | -0.583133 |
| C | 1.908998  | -0.343468 | 0.310119  |
| C | 0.822282  | 0.153224  | 1.111977  |
| C | -0.502365 | -0.356791 | 1.045748  |
| C | -0.742628 | -1.375523 | 0.131092  |
| C | 0.288872  | -1.918672 | -0.689132 |
| C | -1.524061 | 0.139352  | 2.054686  |
| C | -2.935437 | 0.550051  | 1.574941  |
| O | -1.964684 | -1.961907 | -0.011801 |
| C | -2.913151 | 1.693752  | 0.537106  |
| C | -2.713456 | 1.250581  | -0.895573 |
| C | -2.862838 | -0.036473 | -1.246658 |
| C | -3.160652 | -1.131588 | -0.268211 |
| C | -2.392832 | 2.309018  | -1.940512 |
| H | -3.450675 | 0.925398  | 2.467930  |
| C | 0.011998  | -2.970544 | -1.635806 |
| C | -3.456405 | 3.424522  | -1.984600 |
| C | -0.982293 | 2.904411  | -1.750549 |
| C | 3.245786  | 0.262491  | 0.472775  |
| O | 3.396816  | 1.190719  | 1.299313  |
| O | 2.564430  | -1.929081 | -1.352082 |
| O | 1.044873  | 1.132325  | 1.984532  |
| O | 0.880417  | -3.484597 | -2.371797 |
| C | 4.442178  | -0.204515 | -0.332245 |
| C | 5.791296  | 0.506183  | -0.091526 |
| C | 5.779134  | 1.991162  | -0.492509 |
| C | 6.348035  | 0.297150  | 1.327101  |
| C | -3.778238 | -0.626269 | 1.052867  |
| C | -3.960447 | -1.758180 | 2.068325  |
| O | -5.068643 | -0.060065 | 0.750915  |
| H | -1.630036 | -0.623813 | 2.836610  |
| H | -1.091579 | 1.007275  | 2.554047  |
| H | -3.867050 | 2.232327  | 0.588963  |
| H | -2.139189 | 2.418295  | 0.818245  |

|   |           |           |           |
|---|-----------|-----------|-----------|
| H | -2.737517 | -0.336127 | -2.285724 |
| H | -3.839619 | -1.867955 | -0.713681 |
| H | -2.404705 | 1.803285  | -2.915024 |
| H | -1.023653 | -3.327573 | -1.699708 |
| H | -3.252268 | 4.107347  | -2.816537 |
| H | -4.461592 | 3.012368  | -2.121867 |
| H | -3.456203 | 4.019045  | -1.064316 |
| H | -0.755620 | 3.602410  | -2.564073 |
| H | -0.216983 | 2.121932  | -1.751458 |
| H | -0.898045 | 3.458770  | -0.809475 |
| H | 2.125927  | -2.650080 | -1.910195 |
| H | 2.030301  | 1.367411  | 1.899980  |
| H | 4.552649  | -1.282129 | -0.158893 |
| H | 4.170427  | -0.138747 | -1.392871 |
| H | 6.482053  | -0.001934 | -0.780467 |
| H | 6.794009  | 2.403265  | -0.455271 |
| H | 5.407375  | 2.122157  | -1.516080 |
| H | 5.148817  | 2.580552  | 0.178090  |
| H | 7.372772  | 0.680208  | 1.393409  |
| H | 6.376416  | -0.767659 | 1.588543  |
| H | 5.742445  | 0.816202  | 2.074151  |
| H | -4.382478 | -1.359140 | 2.995983  |
| H | -4.656714 | -2.508325 | 1.671387  |
| H | -3.026775 | -2.275858 | 2.292712  |
| H | -5.685964 | -0.775139 | 0.545247  |

**Conformer 61:**

|   |           |           |           |
|---|-----------|-----------|-----------|
| C | 1.673233  | -1.292598 | -0.502683 |
| C | 1.907469  | -0.358057 | 0.537165  |
| C | 0.775793  | 0.013123  | 1.344001  |
| C | -0.538605 | -0.482031 | 1.130485  |
| C | -0.717630 | -1.361981 | 0.069061  |
| C | 0.364369  | -1.789707 | -0.754695 |
| C | -1.619760 | -0.135640 | 2.140079  |
| C | -3.005495 | 0.338686  | 1.644919  |
| O | -1.925757 | -1.918764 | -0.227431 |
| C | -2.936218 | 1.617944  | 0.783833  |
| C | -2.636116 | 1.389729  | -0.683162 |
| C | -2.750858 | 0.166292  | -1.223555 |
| C | -3.108823 | -1.055329 | -0.431233 |
| C | -2.246740 | 2.625055  | -1.484330 |
| H | -3.573617 | 0.581015  | 2.551758  |
| C | 0.153489  | -2.708131 | -1.846213 |
| C | -1.707987 | 2.334209  | -2.891772 |
| C | -3.416406 | 3.633263  | -1.559507 |
| C | 3.222028  | 0.235130  | 0.843066  |
| O | 3.331566  | 1.010654  | 1.820046  |
| O | 2.678065  | -1.715907 | -1.269099 |
| O | 0.943660  | 0.854455  | 2.360791  |
| O | 1.069218  | -3.121708 | -2.588009 |
| C | 4.460894  | -0.065383 | 0.022299  |
| C | 5.705195  | 0.759940  | 0.392920  |
| C | 6.958123  | 0.110375  | -0.216331 |
| C | 5.576277  | 2.223608  | -0.058943 |
| C | -3.806973 | -0.748748 | 0.909622  |
| C | -4.038793 | -2.016138 | 1.737317  |
| O | -5.082095 | -0.144230 | 0.616690  |
| H | -1.762492 | -1.002830 | 2.797937  |
| H | -1.223659 | 0.652428  | 2.781805  |
| H | -3.898484 | 2.137775  | 0.857714  |
| H | -2.186648 | 2.300102  | 1.206826  |
| H | -2.541836 | 0.000106  | -2.276185 |
| H | -3.755680 | -1.715840 | -1.020369 |
| H | -1.438571 | 3.112587  | -0.917124 |
| H | -0.873655 | -3.053166 | -2.019938 |
| H | -1.363414 | 3.263318  | -3.357480 |
| H | -0.864030 | 1.637432  | -2.868593 |
| H | -2.482956 | 1.911407  | -3.541587 |
| H | -3.104738 | 4.534974  | -2.097563 |
| H | -3.762009 | 3.941698  | -0.568783 |
| H | -4.267408 | 3.195476  | -2.093675 |

|   |           |           |           |
|---|-----------|-----------|-----------|
| H | 2.281499  | -2.357116 | -1.943249 |
| H | 1.931777  | 1.091767  | 2.371609  |
| H | 4.661677  | -1.139654 | 0.132996  |
| H | 4.221516  | 0.050575  | -1.040970 |
| H | 5.807191  | 0.750289  | 1.484644  |
| H | 7.857747  | 0.678309  | 0.045338  |
| H | 7.094399  | -0.916578 | 0.141880  |
| H | 6.894979  | 0.076016  | -1.311453 |
| H | 6.465924  | 2.797063  | 0.224836  |
| H | 4.707960  | 2.708725  | 0.395086  |
| H | 5.476714  | 2.286369  | -1.150634 |
| H | -4.520177 | -1.756067 | 2.685241  |
| H | -4.701916 | -2.702076 | 1.194283  |
| H | -3.115053 | -2.559350 | 1.941492  |
| H | -5.681090 | -0.822421 | 0.276184  |

**Conformer 64:**

|   |           |           |           |
|---|-----------|-----------|-----------|
| C | -1.705640 | -1.292547 | 0.349041  |
| C | -1.849118 | -0.546063 | -0.848942 |
| C | -0.640410 | -0.230567 | -1.565174 |
| C | 0.656399  | -0.617965 | -1.131643 |
| C | 0.738330  | -1.323040 | 0.063232  |
| C | -0.418901 | -1.676473 | 0.818298  |
| C | 1.836102  | -0.363985 | -2.054631 |
| C | 3.137601  | 0.242413  | -1.481585 |
| O | 1.918824  | -1.773379 | 0.573011  |
| C | 2.922491  | 1.622681  | -0.826302 |
| C | 2.484264  | 1.590746  | 0.621600  |
| C | 2.580424  | 0.465199  | 1.346074  |
| C | 3.047710  | -0.840525 | 0.775779  |
| C | 1.990323  | 2.915521  | 1.187119  |
| H | 3.800311  | 0.384511  | -2.344381 |
| C | -0.305166 | -2.401392 | 2.059432  |
| C | 0.535024  | 3.194720  | 0.747188  |
| C | 2.120775  | 3.047744  | 2.711512  |
| C | -3.137495 | -0.111326 | -1.414308 |
| O | -3.151077 | 0.515297  | -2.501356 |
| O | -2.774335 | -1.635302 | 1.067477  |
| O | -0.715566 | 0.443408  | -2.708003 |
| O | -1.286254 | -2.740736 | 2.754463  |
| C | -4.473971 | -0.357019 | -0.751862 |
| C | -4.803828 | 0.652107  | 0.384644  |
| C | -4.927540 | 2.090707  | -0.138715 |
| C | -6.090503 | 0.211409  | 1.097998  |
| C | 3.882699  | -0.692436 | -0.513451 |
| C | 4.245091  | -2.051827 | -1.118734 |
| O | 5.097637  | 0.005712  | -0.176749 |
| H | 2.082791  | -1.306373 | -2.560713 |
| H | 1.491883  | 0.306138  | -2.843451 |
| H | 3.863681  | 2.186713  | -0.864671 |
| H | 2.201919  | 2.197414  | -1.421739 |
| H | 2.295247  | 0.451098  | 2.394240  |
| H | 3.642944  | -1.386954 | 1.516561  |
| H | 2.620190  | 3.695985  | 0.733498  |
| H | 0.705698  | -2.662123 | 2.397214  |
| H | 0.226782  | 4.197078  | 1.064129  |
| H | 0.412362  | 3.136203  | -0.338500 |
| H | -0.148003 | 2.469326  | 1.202829  |
| H | 1.848497  | 4.061360  | 3.024243  |
| H | 3.144306  | 2.851603  | 3.046579  |
| H | 1.451684  | 2.356614  | 3.236574  |
| H | -2.434430 | -2.147129 | 1.872087  |
| H | -1.707962 | 0.615990  | -2.870224 |
| H | -5.222772 | -0.256753 | -1.544712 |
| H | -4.514140 | -1.369587 | -0.347353 |
| H | -3.987448 | 0.613893  | 1.115593  |
| H | -5.142246 | 2.779709  | 0.685901  |
| H | -4.012190 | 2.432482  | -0.631712 |
| H | -5.743287 | 2.174596  | -0.867077 |
| H | -6.339337 | 0.900981  | 1.912380  |
| H | -5.985058 | -0.791533 | 1.525056  |

|   |           |           |           |
|---|-----------|-----------|-----------|
| H | -6.939594 | 0.197068  | 0.403036  |
| H | 4.819527  | -1.906057 | -2.038874 |
| H | 4.866194  | -2.621196 | -0.415093 |
| H | 3.367630  | -2.662249 | -1.336813 |
| H | 5.673020  | -0.587300 | 0.325226  |

**Conformer 69:**

|   |           |           |           |
|---|-----------|-----------|-----------|
| C | -1.669509 | -1.290691 | 0.506299  |
| C | -1.906641 | -0.363172 | -0.539413 |
| C | -0.776959 | 0.003136  | -1.351044 |
| C | 0.537604  | -0.489472 | -1.135806 |
| C | 0.720397  | -1.361451 | -0.068195 |
| C | -0.359784 | -1.784878 | 0.759585  |
| C | 1.618465  | -0.149464 | -2.147113 |
| C | 3.000374  | 0.332438  | -1.644764 |
| O | 1.929689  | -1.914708 | 0.228412  |
| C | 2.918419  | 1.615472  | -0.790552 |
| C | 2.627080  | 1.391450  | 0.679298  |
| C | 2.747956  | 0.171297  | 1.225037  |
| C | 3.110786  | -1.053078 | 0.439876  |
| C | 2.240085  | 2.630155  | 1.476903  |
| H | 3.564992  | 0.576923  | -2.556251 |
| C | -0.145822 | -2.696103 | 1.857056  |
| C | 1.699653  | 2.343334  | 2.884618  |
| C | 3.412894  | 3.634801  | 1.551955  |
| C | -3.222209 | 0.227304  | -0.846477 |
| O | -3.334293 | 0.995766  | -1.828763 |
| O | -2.672798 | -1.709842 | 1.276976  |
| O | -0.947012 | 0.837039  | -2.374102 |
| O | -1.060170 | -3.105619 | 2.602569  |
| C | -4.459197 | -0.067280 | -0.020633 |
| C | -5.703683 | 0.757020  | -0.393130 |
| C | -6.955688 | 0.112563  | 0.223406  |
| C | -5.572097 | 2.223333  | 0.049303  |
| C | 3.807676  | -0.748671 | -0.897221 |
| C | 4.049076  | -2.021632 | -1.713912 |
| O | 5.084315  | -0.204784 | -0.498853 |
| H | 1.767839  | -1.022723 | -2.795324 |
| H | 1.221189  | 0.630976  | -2.797564 |
| H | 3.872488  | 2.150224  | -0.868253 |
| H | 2.158802  | 2.286267  | -1.213817 |
| H | 2.546187  | 0.010358  | 2.279726  |
| H | 3.765236  | -1.705384 | 1.024491  |
| H | 1.433647  | 3.119171  | 0.908479  |
| H | 0.881998  | -3.038607 | 2.031510  |
| H | 1.355453  | 3.273944  | 3.347633  |
| H | 0.855180  | 1.647184  | 2.862068  |
| H | 2.473552  | 1.921390  | 3.536107  |
| H | 3.104292  | 4.537431  | 2.090274  |
| H | 3.758745  | 3.943077  | 0.561099  |
| H | 4.262674  | 3.193925  | 2.085359  |
| H | -2.274579 | -2.346191 | 1.954870  |
| H | -1.934976 | 1.073797  | -2.384788 |
| H | -4.661354 | -1.141982 | -0.124020 |
| H | -4.216955 | 0.055189  | 1.041273  |
| H | -5.808550 | 0.740703  | -1.484514 |
| H | -7.855427 | 0.679722  | -0.039546 |
| H | -7.093818 | -0.916497 | -0.127970 |
| H | -6.889771 | 0.085045  | 1.318556  |
| H | -6.461905 | 2.795909  | -0.235729 |
| H | -4.704407 | 2.704653  | -0.409940 |
| H | -5.469643 | 2.292761  | 1.140317  |
| H | 4.527747  | -1.773118 | -2.669849 |
| H | 4.714731  | -2.690069 | -1.158560 |
| H | 3.127231  | -2.564557 | -1.926900 |
| H | 5.668310  | -0.200798 | -1.269101 |

## 2. References

- (1) Liu, H.; He, X. Z.; Feng, M. Y.; Yuan-Zeng; Rauwolf, T. J.; Shao, L. D.; Ni, W.; Yan, H.; Porco, J. A.; Hao, X. J.; Qin, X. J.; Liu, H. Y. Acylphloroglucinols with Acetylcholinesterase Inhibitory Effects from the Fruits of *Eucalyptus robusta*. *Bioorg Chem* **2020**, *103*. <https://doi.org/10.1016/j.bioorg.2020.104127>.
- (2) Daus, M.; Wunnoo, S.; Voravuthikunchai, S. P.; Saithong, S.; Poldorn, P.; Jungsuttiwong, S.; Chomlamay, N.; Yangok, K.; Watanapokasin, R.; Chakthong, S. Phloroglucinol–Meroterpenoids from the Leaves of *Eucalyptus camaldulensis* Dehnh. *Phytochemistry* **2022**, *200*. <https://doi.org/10.1016/j.phytochem.2022.113179>.
- (3) Baxter, J. R.; Holland, D. C.; Gavranich, B.; Nicolle, D.; Hayton, J. B.; Avery, V. M.; Carroll, A. R. NMR Fingerprints of Formyl Phloroglucinol Meroterpenoids and Their Application to the Investigation of *Eucalyptus gittinsii* subsp. *gittinsii*. *J Nat Prod* **2023**, *86* (5), 1317–1334. <https://doi.org/10.1021/acs.jnatprod.3c00139>.
- (4) Grimblat, N.; Zanardi, M. M.; Sarotti, A. M. Beyond DP4: An Improved Probability for the Stereochemical Assignment of Isomeric Compounds Using Quantum Chemical Calculations of NMR Shifts. *Journal of Organic Chemistry* **2015**, *80* (24), 12526–12534. <https://doi.org/10.1021/acs.joc.5b02396>.
